# Supplementary material for: Origins of the selectivity of late transition metals of Group 9 and Group 10 for oxidative addition of C–H vs. C–Cl bonds
Source: Royal Society of Chemistry journal article supplement (doi:10.1039/d6sc00090h), 2026-04-08
Supplement: d6sc00090h1.pdf [file d6sc00090h1.pdf]

## Supporting Information for

### Origins of the Selectivity of Late Transition Metals of Group 9 and Group 10 for Oxidative Addition of C–H vs C–Cl Bonds

Yehao Qiu,<sup>†,1</sup> Alistair J. Sterling,<sup>†,1,2</sup> Kevin Ikeda,<sup>1</sup> Alexander Zech,<sup>1</sup> Matthias Loipersberger,<sup>1</sup> Diptarka Hait,<sup>1</sup> Martin Head-Gordon<sup>\*,1</sup>, and John F. Hartwig<sup>\*\*1</sup>

<sup>1</sup>Department of Chemistry, University of California, Berkeley, California, 94720, United States

<sup>2</sup>Present address: Department of Chemistry and Biochemistry, The University of Texas at Dallas, Richardson, Texas, 75080, United States

<sup>†</sup>These authors contributed equally to this work.

\*mhg@cchem.berkeley.edu

\*\*jhartwig@berkeley.edu

#### Table of Contents

|                                                                                                             |    |
|-------------------------------------------------------------------------------------------------------------|----|
| 1. Computational Methods .....                                                                              | 2  |
| 2. Distortion/Interaction Model and Energy Decomposition Analysis .....                                     | 3  |
| 3. Oxidative Addition of <i>ortho</i> - versus <i>para</i> -C–H bond in PhCl to (L1)Ir and (L1)Rh Complexes | 4  |
| 4. Oxidative Addition of Aryl C–H and C–Cl Bonds to (tBuL1)Ir and (tBuL1)Rh Complexes.....                  | 6  |
| 5. Energies of Optimized Structures .....                                                                   | 8  |
| 6. References .....                                                                                         | 10 |
| 7. Atomic Coordinates of Optimized Structures .....                                                         | 12 |

## 1. Computational Methods

All calculations were performed with the Q-Chem (Version 5.4.1) program.<sup>[1]</sup> Geometry optimizations were conducted with the PBE0 functional<sup>[2]</sup> and the basis sets def2-SVP for H atoms, def2-SVPD for O, Cl, and P atoms, and def2-TZVP (with matching Karlsruhe effective core potential, def2-ECP) for metal centers (**BS1**),<sup>[3]</sup> with Grimme's D3 dispersion correction with Becke-Johnson damping (D3BJ)<sup>[4]</sup> in the gas phase. The nature of each stationary point was evaluated by accompanying frequency calculations (all positive eigenvalues for ground states and precisely one negative eigenvalue for transition states). Further single-point energy calculations were performed on the optimized structures with the def2-TZVPD basis set (with def2-ECP for metal centers) for all atoms (**BS2**) using the SMD solvation model with chlorobenzene as the solvent. In all cases, Gibbs free energies for **BS2** were estimated by adding the thermal corrections obtained from frequency calculations using **BS1** to the electronic energies computed at **BS2**.

Energy decomposition analysis was performed using the second-generation absolutely localized molecular orbital energy decomposition analysis (ALMO-EDA).<sup>[5]</sup> Natural Bond Orbital (NBO) and Natural Population Analysis (NPA) were conducted with the NBO 5.0 program.<sup>[6]</sup> AIM calculations were conducted with the Multiwfn (Version 3.8) program.<sup>[7]</sup>

Literature suggests that the PBE0 functional performs well for Pd-mediated bond activation reactions and for calculating barriers to a broad set of transition-metal-mediated insertion and bond activation reactions.<sup>[8-11]</sup> Nevertheless, computed energy differences on the order of 1–3 kcal/mol lie near the expected uncertainty of DFT methods for these systems and should be interpreted qualitatively in the context of experimental observations and other computational data.

## 2. Distortion/Interaction Model and Energy Decomposition Analysis

The Activation Strain Model (ASM)<sup>[12-14]</sup> or the Distortion/Interaction Model<sup>[15-16]</sup> decomposes the potential energy surface  $\Delta E(\zeta)$  along the reaction coordinate  $\zeta$  of a given chemical reaction into two terms: the reaction strain or distortion energy,  $\Delta E_{\text{strain}}(\zeta)$ , and the interaction energy,  $\Delta E_{\text{int}}(\zeta)$ ; <sup>[17]</sup> that is,

$$\Delta E(\zeta) = \Delta E_{\text{strain}}(\zeta) + \Delta E_{\text{int}}(\zeta) \quad (\text{S1})$$

The distortion energy,  $\Delta E_{\text{strain}}(\zeta)$ , refers to the energy required to distort the geometries of the reactants from their lowest-energy ground states to the reactive conformations. By definition, the distortion energy is destabilizing, *i.e.*,  $\Delta E_{\text{strain}}(\zeta) > 0$ . The interaction energy,  $\Delta E_{\text{int}}(\zeta)$ , refers to the change in energy caused by interactions between the distorted reactive fragments and is stabilizing, *i.e.*,  $\Delta E_{\text{int}}(\zeta) < 0$ . Therefore, the sum of  $\Delta E_{\text{strain}}(\zeta)$  and  $\Delta E_{\text{int}}(\zeta)$  determines the energy profile of a chemical reaction along the reaction coordinate. At the transition state, the potential energy surface reaches a first-order saddle point; that is, for  $\zeta = \zeta(\text{TS})$ ,

$$\frac{\partial \Delta E(\zeta)}{\partial \zeta} = \frac{\partial \Delta E_{\text{strain}}(\zeta)}{\partial \zeta} + \frac{\partial \Delta E_{\text{int}}(\zeta)}{\partial \zeta} = 0 \quad (\text{S2})$$

Rearrangement of eq S2 gives the following equation:

$$\frac{\partial \Delta E_{\text{strain}}(\zeta)}{\partial \zeta} = - \frac{\partial \Delta E_{\text{int}}(\zeta)}{\partial \zeta} \quad (\text{S3})$$

This equation shows that the rate by which  $\Delta E_{\text{strain}}(\zeta)$  increases is equal to the rate by which  $\Delta E_{\text{int}}(\zeta)$  decreases at the transition state.

According to Energy Decomposition Analysis based on Absolutely Localized Molecular Orbitals (ALMO EDA),<sup>[18-20]</sup> the interaction energy,  $\Delta E_{\text{int}}$ , can be further decomposed into three terms: the frozen density term ( $\Delta E_{\text{FRZ}}$ ), the polarization term, ( $\Delta E_{\text{POL}}$ ), and the charge transfer term, ( $\Delta E_{\text{CT}}$ ). The frozen density term ( $\Delta E_{\text{FRZ}}$ ) is defined as the change in energy caused by bringing infinitely separated, distorted reactive fragments into the reactive complex without any relaxation of the molecular orbitals (MOs) on those fragments and describes primarily the Pauli repulsion, permanent electrostatic interaction and dispersion of the reactants. The polarization term ( $\Delta E_{\text{POL}}$ ) refers to the stabilization energy attributable to relaxation of localized MOs on each reactive fragment in the field produced by all other fragments and quantifies the polarization of electron density that is induced by the approaching reactive fragments. Lastly, the charge transfer term ( $\Delta E_{\text{CT}}$ ) describes the stabilization caused by charge transfer from occupied orbitals of one reactive fragment to virtual orbitals of another fragment. ALMO EDA allows the interaction energy ( $\Delta E_{\text{int}}$ ) to be interpreted in chemically meaningful terms, such as electrostatic interactions and orbital interactions,<sup>[20]</sup> and has been used for the analysis of many chemical systems.<sup>[18-25]</sup>

### 3. Oxidative Addition of *ortho*- versus *para*-C–H bond in PhCl to (L1)Ir and (L1)Rh Complexes

Consistent with published experimental<sup>[26-27]</sup> and computational<sup>[28-29]</sup> studies, our calculations suggest that oxidative addition of the *ortho*-C–H bond in PhCl to (L1)Ir and (L1)Rh complexes is more favorable than that of the *para*-C–H bond (see Figures S1 and S2) because during the reaction with the *ortho*-C–H bond, the proximal chlorine atom partially coordinates to the metal center and stabilizes the transition state and the product whereas such stabilization is absent in the reaction with the *para*-C–H bond due to the long distance between Cl and the metal center. Although the reaction with the *para*-C–H bond is less energetically favorable than that with the *ortho*-C–H bond, we still chose the former as the model system so that our analysis can focus on the interactions between the metal complex and the C–H bond, without interfering interactions between Cl and the metal center.

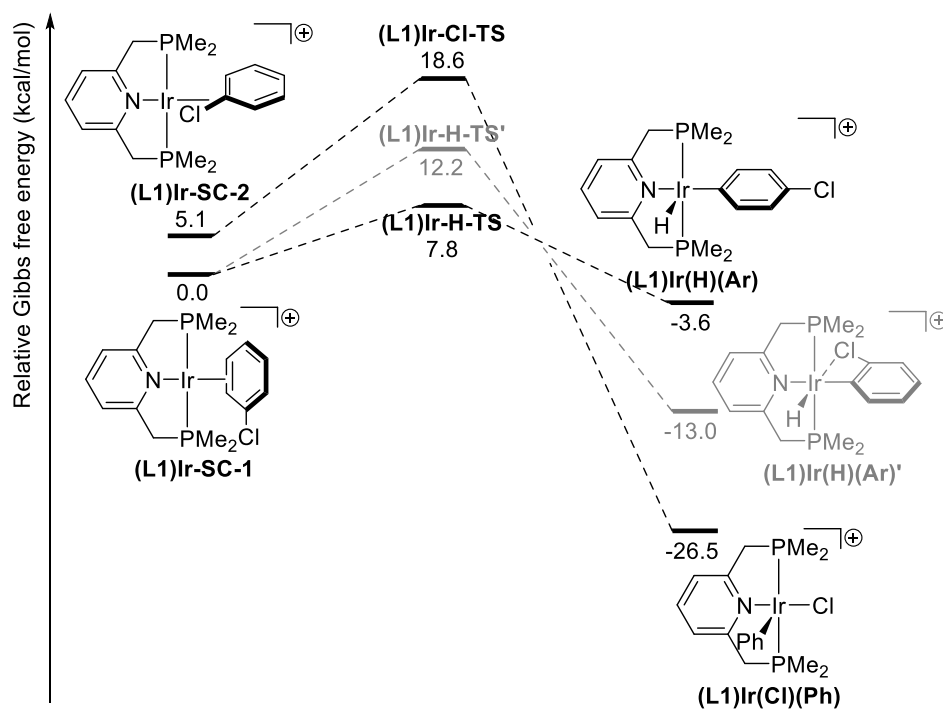

**Figure S1.** Free-energy diagram of the oxidative addition of the *ortho*- and *para*-C–H bonds as well as the C–Cl bond in PhCl to (L1)Ir(I) complexes.

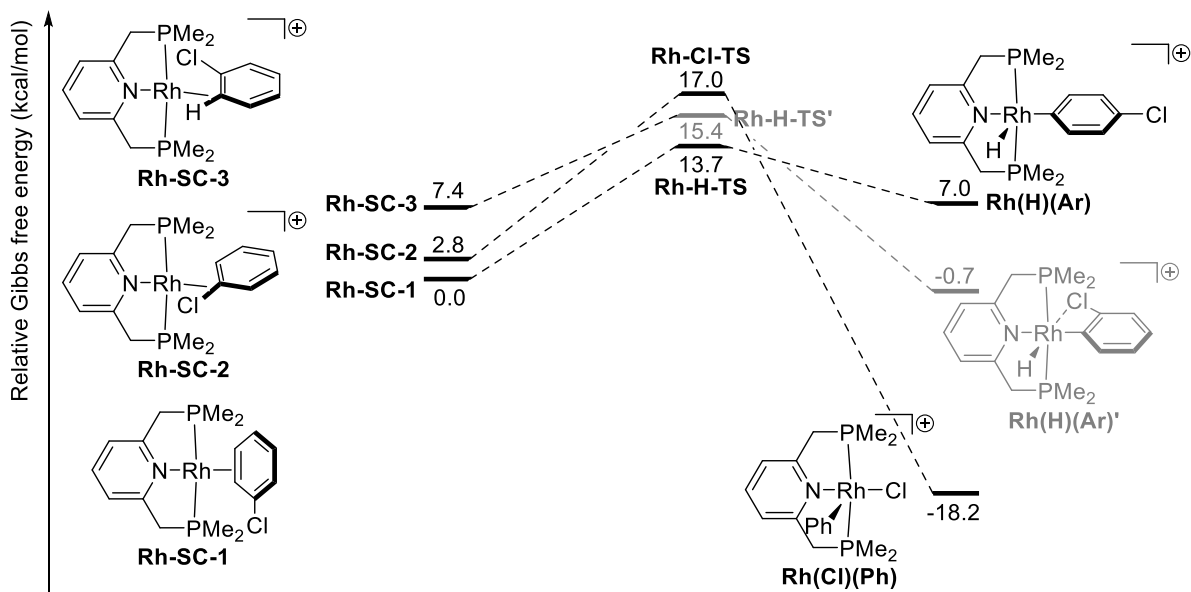

**Figure S2.** Free-energy diagram of the oxidative addition of the *ortho*- and *para*-C–H bonds as well as the C–Cl bond in PhCl to (L1)Rh(I) complexes.

#### 4. Oxidative Addition of Aryl C–H and C–Cl Bonds to (tBuL1)Ir and (tBuL1)Rh Complexes

To investigate the steric effect of the ligand on the selectivity of oxidative addition, we calculated Ir and Rh complexes containing the ligand, 2,6-bis((di-*tert*-butylphosphino)methyl)pyridine (**tBuL1**), which is more sterically demanding than the ligand **L1** containing methyl groups on phosphorus. The results are shown in Figures S3 and S4. For (**L1**)Rh and (**L1**)Ir complexes, the  $\pi$ -complex between the C(2)–C(3) bond of the chlorobenzene and the metal center (**Ir-SC-1** or **Rh-SC-1**) is the lowest-energy structure prior to the transition state. For (**tBuL1**)Rh and (**tBuL1**)Ir complexes, however, the  $\sigma$ -complex between the C–Cl bond and the metal center (**Ir-SC-2** or **Rh-SC-2**) was found to be the lowest-energy structure prior to the transition state. We propose that steric interactions between PhCl and the *tert*-butyl substituents in (**tBuL1**)**Ir-SC-1** and (**tBuL1**)**Rh-SC-1** significantly destabilize these structures, whereas such interactions are negligible in (**tBuL1**)**Ir-SC-2** and (**tBuL1**)**Rh-SC-2** because the phenyl ring is positioned far away from the *tert*-butyl groups.

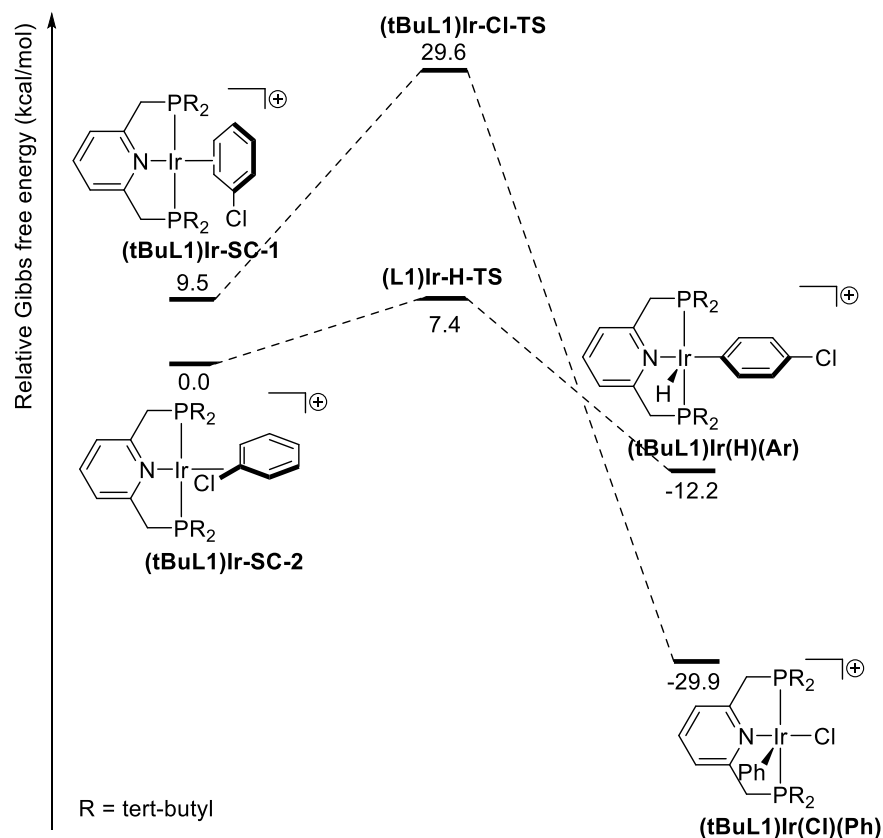

**Figure S3.** Free-energy diagram of the oxidative addition of the *ortho*-C–H bond and the C–Cl bond in PhCl to (**tBuL1**)Ir(I) complexes.

Oxidative addition of an aryl C–H bond to (**tBuL1**)M<sup>+</sup> (M = Ir or Rh) is thermodynamically more favorable than that to the corresponding (**L1**)M<sup>+</sup> complex, whereas the  $\Delta G$  value for oxidative addition of an aryl C–Cl bond to (**L1**)M<sup>+</sup> is similar to that for oxidative addition to

(**tBuL1**)M<sup>+</sup>. The barrier to oxidative addition of an aryl C–Cl bond to (**tBuL1**)M<sup>+</sup> is significantly higher (by over 10 kcal/mol) than that to the corresponding (**L1**)M<sup>+</sup> complex, whereas the barrier to oxidative addition of an aryl C–H bond to (**L1**)M<sup>+</sup> is similar to that for addition to (**tBuL1**)M<sup>+</sup>. These computed data suggest that Group 9 metal complexes containing the bulky **tBuL1** ligand are more selective for the oxidative addition of aryl C–H bonds over aryl C–Cl bonds than those containing the **L1** ligand, and that products from C–H activation are the only products that will be formed when PhCl reacts with (**L1**)M<sup>+</sup> or (**tBuL1**)M<sup>+</sup>. These conclusions are consistent with reported experimental results.<sup>[26, 30]</sup>

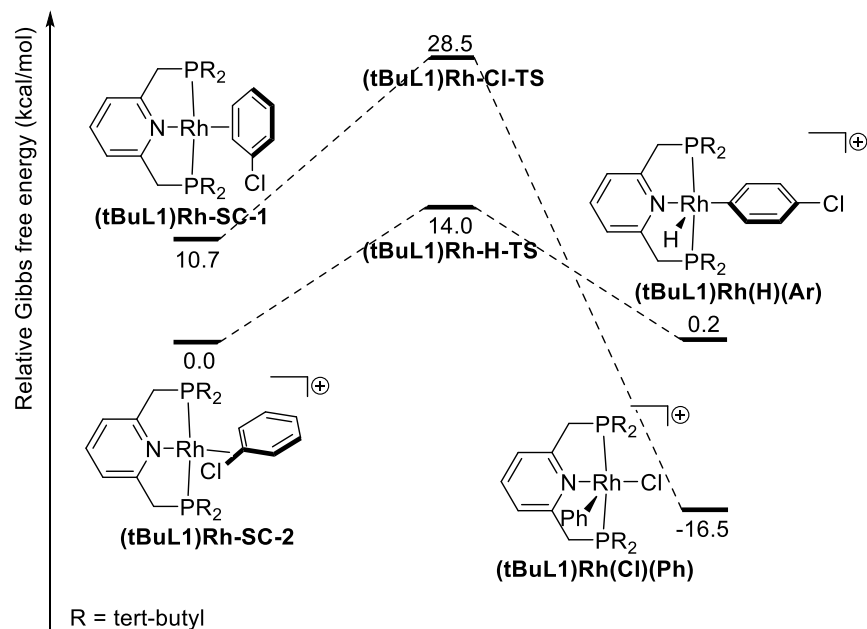

**Figure S4.** Free-energy diagram of the oxidative addition of the *ortho*-C–H bond and the C–Cl bond in PhCl to (**tBuL1**)Rh(I) complexes.

## 5. Energies of Optimized Structures

Table S1. Energies of Optimized Structures.

| Structure         | E(BS1) (Hartree) | Thermal Correction        | Thermal Correction                                     | E(BS2) (Hartree) |
|-------------------|------------------|---------------------------|--------------------------------------------------------|------------------|
|                   |                  | to Enthalpy<br>(kcal/mol) | to Entropy (cal<br>mol <sup>-1</sup> K <sup>-1</sup> ) |                  |
| PhCl              | -691.129164      | 61.607                    | 76.062                                                 | -691.525282      |
| (L1)Ir-SC-1       | -1962.181526     | 251.223                   | 165.752                                                | -1963.391189     |
| (L1)Ir-SC-2       | -1962.170445     | 251.463                   | 172.489                                                | -1963.380206     |
| (L1)Ir-H-TS       | -1962.157335     | 248.287                   | 171.445                                                | -1963.371382     |
| (L1)Ir-H-TS'      | -1962.158370     | 248.478                   | 166.716                                                | -1963.366919     |
| (L1)Ir-Cl-TS      | -1962.146672     | 250.201                   | 167.072                                                | -1963.359270     |
| (L1)Ir(H)(Ar)     | -1962.175185     | 249.188                   | 172.899                                                | -1963.390307     |
| (L1)Ir(H)(Ar)'    | -1962.201173     | 249.517                   | 166.486                                                | -1963.408819     |
| (L1)Ir(Cl)(Ph)    | -1962.222598     | 251.358                   | 169.023                                                | -1963.432110     |
| (tBuL1)Ir-SC-1    | -2433.042523     | 472.378                   | 216.834                                                | -2434.733940     |
| (tBuL1)Ir-SC-2    | -2433.051535     | 471.282                   | 222.380                                                | -2434.744512     |
| (tBuL1)Ir-H-TS    | -2433.034647     | 468.982                   | 218.060                                                | -2434.729622     |
| (tBuL1)Ir-Cl-TS   | -2433.011701     | 472.080                   | 213.343                                                | -2434.704118     |
| (tBuL1)Ir(H)(Ar)  | -2433.067677     | 469.771                   | 219.489                                                | -2434.763988     |
| (tBuL1)Ir(Cl)(Ph) | -2433.104305     | 472.306                   | 217.965                                                | -2434.792742     |
| (L3)Ir-SC-1       | -2153.151397     | 278.606                   | 180.774                                                | -2154.518228     |
| (L3)Ir-H-TS       | -2153.117016     | 277.339                   | 181.896                                                | -2154.488068     |
| (L3)Ir-Cl-TS      | -2153.109490     | 277.727                   | 183.898                                                | -2154.483123     |
| (L3)Ir(H)(Ar)     | -2153.149517     | 276.823                   | 188.817                                                | -2154.517776     |
| (L3)Ir(Cl)(Ph)    | -2153.201794     | 278.987                   | 184.741                                                | -2154.564878     |
| Rh-SC-1           | -1968.379119     | 251.145                   | 166.474                                                | -1969.587231     |
| Rh-SC-2           | -1968.373452     | 251.398                   | 171.036                                                | -1969.581072     |
| Rh-SC-3           | -1968.366137     | 250.749                   | 169.508                                                | -1969.573384     |
| Rh-H-TS           | -1968.345644     | 248.103                   | 170.792                                                | -1969.558572     |
| Rh-H-TS'          | -1968.351146     | 248.173                   | 167.493                                                | -1969.557481     |
| Rh-Cl-TS          | -1968.346519     | 250.075                   | 167.555                                                | -1969.557957     |
| Rh(H)(Ar)         | -1968.355429     | 248.863                   | 172.087                                                | -1969.569809     |
| Rh(H)(Ar)'        | -1968.378926     | 249.191                   | 166.770                                                | -1969.585106     |
| Rh(Cl)(Ph)        | -1968.405346     | 251.238                   | 168.352                                                | -1969.615421     |
| (tBuL1)Rh-SC-1    | -2439.241827     | 472.339                   | 216.871                                                | -2440.933043     |
| (tBuL1)Rh-SC-2    | -2439.254160     | 471.414                   | 221.053                                                | -2440.945183     |
| (tBuL1)Rh-H-TS    | -2439.226933     | 469.189                   | 216.613                                                | -2440.920996     |
| (tBuL1)Rh-Cl-TS   | -2439.213208     | 471.750                   | 214.167                                                | -2440.904360     |
| (tBuL1)Rh(H)(Ar)  | -2439.246840     | 469.173                   | 220.295                                                | -2440.942206     |
| (tBuL1)Rh(Cl)(Ph) | -2439.287183     | 472.770                   | 215.302                                                | -2440.976254     |
| Pd-SC             | -1864.760693     | 379.232                   | 185.012                                                | -1866.018376     |
| Pd-H-TS           | -1864.712937     | 376.132                   | 187.779                                                | -1865.974077     |
| Pd-Cl-TS          | -1864.739286     | 378.877                   | 180.220                                                | -1865.998335     |
| Pd(H)(Ar)         | -1864.713222     | 376.862                   | 189.243                                                | -1865.975306     |

|                   |              |         |         |              |
|-------------------|--------------|---------|---------|--------------|
| <b>Pd(Cl)(Ph)</b> | -1864.776740 | 380.118 | 182.106 | -1866.043072 |
| <b>Pt-SC</b>      | -1856.208349 | 379.190 | 188.052 | -1857.468860 |
| <b>Pt-H-TS</b>    | -1856.178406 | 376.548 | 186.891 | -1857.439838 |
| <b>Pt-Cl-TS</b>   | -1856.185409 | 379.160 | 181.569 | -1857.448425 |
| <b>Pt(H)(Ar)</b>  | -1856.187422 | 377.478 | 190.508 | -1857.450664 |
| <b>Pt(Cl)(Ph)</b> | -1856.245618 | 380.247 | 182.265 | -1857.511305 |

---

## 6. References

- [1] E. Epifanovsky, A. T. B. Gilbert, X. Feng, J. Lee, Y. Mao, N. Mardirossian, P. Pokhilko, A. F. White, M. P. Coons, A. L. Dempwolff, Z. Gan, D. Hait, P. R. Horn, L. D. Jacobson, I. Kaliman, J. Kussmann, A. W. Lange, K. U. Lao, D. S. Levine, J. Liu, S. C. McKenzie, A. F. Morrison, K. D. Nanda, F. Plasser, D. R. Rehn, M. L. Vidal, Z.-Q. You, Y. Zhu, B. Alam, B. J. Albrecht, A. Aldossary, E. Alguire, J. H. Andersen, V. Athavale, D. Barton, K. Begam, A. Behn, N. Bellonzi, Y. A. Bernard, E. J. Berquist, H. G. A. Burton, A. Carreras, K. Carter-Fenk, R. Chakraborty, A. D. Chien, K. D. Closser, V. Cofer-Shabica, S. Dasgupta, M. d. Wergifosse, J. Deng, M. Diedenhofen, H. Do, S. Ehlert, P.-T. Fang, S. Fatehi, Q. Feng, T. Friedhoff, J. Gayvert, Q. Ge, G. Gidofalvi, M. Goldey, J. Gomes, C. E. González-Espinoza, S. Gulania, A. O. Gunina, M. W. D. Hanson-Heine, P. H. P. Harbach, A. Hauser, M. F. Herbst, M. H. Vera, M. Hodecker, Z. C. Holden, S. Houck, X. Huang, K. Hui, B. C. Huynh, M. Ivanov, Á. Jász, H. Ji, H. Jiang, B. Kaduk, S. Kähler, K. Khistyayev, J. Kim, G. Kis, P. Klunzinger, Z. Koczor-Benda, J. H. Koh, D. Kosenkov, L. Kouliias, T. Kowalczyk, C. M. Krauter, K. Kue, A. Kunitsa, T. Kus, I. Ladjánszki, A. Landau, K. V. Lawler, D. Lefrancois, S. Lehtola, et al., *J. Chem. Phys.* 2021, **155**, 084801.
- [2] M. Ernzerhof, G. E. Scuseria, *J. Chem. Phys.* 1999, **110**, 5029-5036.
- [3] F. Weigend, R. Ahlrichs, *Phys. Chem. Chem. Phys.* 2005, **7**, 3297-3305.
- [4] S. Grimme, S. Ehrlich, L. Goerigk, *J. Comput. Chem.* 2011, **32**, 1456-1465.
- [5] P. R. Horn, Y. Mao, M. Head-Gordon, *Phys. Chem. Chem. Phys.* 2016, **18**, 23067-23079.
- [6] E. D. B. Glendening, J. K.; Reed, A. E.; Carpenter, J. E.; Bohmann, J. A.; Morales, C. M.; Weinhold F., Theoretical Chemistry Institute, University of Wisconsin, Madison, 2001.
- [7] T. Lu, F. Chen, *J. Comput. Chem.* 2012, **33**, 580-592.
- [8] K. H. Hopmann, *Organometallics* 2016, **35**, 3795-3807.
- [9] M. M. Quintal, A. Karton, M. A. Iron, A. D. Boese, J. M. L. Martin, *J. Phys. Chem. A* 2006, **110**, 709-716.
- [10] M. Steinmetz, S. Grimme, *ChemistryOpen* 2013, **2**, 115-124.
- [11] T. Weymuth, E. P. A. Couzijn, P. Chen, M. Reiher, *Journal of Chemical Theory and Computation* 2014, **10**, 3092-3103.
- [12] L. P. Wolters, F. M. Bickelhaupt, *WIREs Comput. Mol. Sci.* 2015, **5**, 324-343.
- [13] I. Fernández, F. M. Bickelhaupt, *Chem. Soc. Rev.* 2014, **43**, 4953-4967.
- [14] F. M. Bickelhaupt, *J. Comput. Chem.* 1999, **20**, 114-128.
- [15] D. H. Ess, K. N. Houk, *J. Am. Chem. Soc.* 2007, **129**, 10646-10647.
- [16] D. H. Ess, K. N. Houk, *J. Am. Chem. Soc.* 2008, **130**, 10187-10198.
- [17] F. M. Bickelhaupt, K. N. Houk, *Angew. Chem. Int. Ed.* 2017, **56**, 10070-10086.
- [18] R. Z. Khaliullin, E. A. Cobar, R. C. Lochan, A. T. Bell, M. Head-Gordon, *J. Phys. Chem. A* 2007, **111**, 8753-8765.
- [19] Y. Mao, M. Loipersberger, P. R. Horn, A. Das, O. Demerdash, D. S. Levine, S. P. Veccham, T. Head-Gordon, M. Head-Gordon, *Annu. Rev. Phys. Chem.* 2021, **72**, 641-666.
- [20] M. v. Hopffgarten, G. Frenking, *WIREs Comput. Mol. Sci.* 2012, **2**, 43-62.
- [21] N. I. Saper, A. Ohgi, D. W. Small, K. Semba, Y. Nakao, J. F. Hartwig, *Nat. Chem.* 2020, **12**, 276-283.
- [22] Y. Mao, M. Loipersberger, K. J. Kron, J. S. Derrick, C. J. Chang, S. M. Sharada, M. Head-Gordon, *Chem. Sci.* 2021, **12**, 1398-1414.
- [23] R. Z. Khaliullin, A. T. Bell, M. Head-Gordon, *Chemistry – A European Journal* 2009, **15**, 851-855.
- [24] J. Thirman, E. Engelage, S. M. Huber, M. Head-Gordon, *Phys. Chem. Chem. Phys.* 2018, **20**, 905-915.
- [25] P. R. Horn, E. J. Sundstrom, T. A. Baker, M. Head-Gordon, *J. Chem. Phys.* 2013, **138**, 134119.
- [26] E. Ben-Ari, M. Gandelman, H. Rozenberg, L. J. W. Shimon, D. Milstein, *J. Am. Chem. Soc.* 2003, **125**, 4714-4715.
- [27] L. Fan, S. Parkin, O. V. Ozerov, *J. Am. Chem. Soc.* 2005, **127**, 16772-16773.
- [28] H. Wu, M. B. Hall, *Can. J. Chem.* 2009, **87**, 1460-1469.

- [29] H. Wu, M. B. Hall, *Dalton Trans.* 2009, 5933-5942.
- [30] E. Ben-Ari, R. Cohen, M. Gandelman, L. J. W. Shimon, J. M. L. Martin, D. Milstein, *Organometallics* 2006, **25**, 3190-3210.

## 7. Atomic Coordinates of Optimized Structures

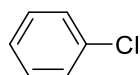

12

### PhCl

|    |               |               |               |
|----|---------------|---------------|---------------|
| H  | -2.1061947027 | -2.1572311959 | 0.0025503860  |
| C  | -1.5656771096 | -1.2078321649 | 0.0015922233  |
| C  | -0.1722221293 | -1.2150088364 | -0.0020815730 |
| H  | 0.3874967102  | -2.1515391852 | -0.0039374734 |
| C  | 0.5093504087  | 0.0001702929  | -0.0032438303 |
| Cl | 2.2480910851  | 0.0022044978  | -0.0079395517 |
| C  | -0.1747642572 | 1.2140271194  | -0.0010278469 |
| H  | 0.3828897468  | 2.1517832857  | -0.0022376803 |
| C  | -1.5681473663 | 1.2039547160  | 0.0025319143  |
| H  | -2.1107184647 | 2.1521801908  | 0.0043845697  |
| C  | -2.2665996069 | -0.0027020663 | 0.0038499480  |
| H  | -3.3586529638 | -0.0037927604 | 0.0065420621  |

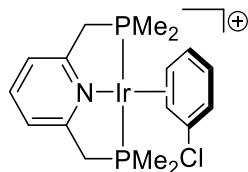

### (L1)Ir-SC-1

46

### (L1)Ir-SC-1

|    |          |          |          |
|----|----------|----------|----------|
| Ir | -0.00971 | -0.20592 | 0.30374  |
| P  | 0.69112  | 2.00314  | 0.19707  |
| P  | -1.27833 | -2.09856 | 0.23783  |
| N  | -1.87737 | 0.71131  | 0.10427  |
| C  | -0.84082 | 2.77882  | 0.87328  |
| C  | -2.03497 | 2.03051  | 0.39093  |
| C  | -3.27416 | 2.65325  | 0.26191  |
| C  | -4.37921 | 1.91614  | -0.14277 |
| C  | -4.21262 | 0.56713  | -0.42772 |
| C  | -2.95251 | -0.00985 | -0.31200 |
| C  | -2.73969 | -1.44748 | -0.67247 |
| C  | 1.97390  | 2.94386  | 1.08855  |
| H  | 1.73265  | 4.01595  | 1.03095  |
| H  | 2.01436  | 2.62697  | 2.13834  |
| H  | 2.95489  | 2.77972  | 0.62851  |
| C  | 0.79344  | 2.64824  | -1.50601 |
| H  | -0.07571 | 2.29442  | -2.07776 |
| H  | 0.82803  | 3.74758  | -1.51985 |
| H  | 1.69716  | 2.24342  | -1.98393 |
| C  | -1.95262 | -2.75279 | 1.80284  |
| H  | -2.41367 | -1.93392 | 2.37176  |
| H  | -2.69799 | -3.54013 | 1.61603  |
| H  | -1.13413 | -3.17036 | 2.40639  |
| C  | -0.78977 | -3.59641 | -0.67926 |

|    |          |          |          |
|----|----------|----------|----------|
| H  | -1.61900 | -4.31749 | -0.72554 |
| H  | 0.06039  | -4.07545 | -0.17200 |
| H  | -0.48342 | -3.32714 | -1.69950 |
| H  | -0.76994 | 2.67960  | 1.97029  |
| H  | -0.92143 | 3.85100  | 0.64141  |
| H  | -3.36525 | 3.71399  | 0.49821  |
| H  | -5.36055 | 2.38616  | -0.23581 |
| H  | -5.05227 | -0.04758 | -0.75562 |
| H  | -3.65361 | -2.04047 | -0.51802 |
| H  | -2.48196 | -1.51478 | -1.74374 |
| H  | 4.30811  | 0.77382  | 1.97753  |
| C  | 3.59482  | 0.22469  | 1.35893  |
| C  | 3.71464  | 0.29907  | -0.05654 |
| H  | 4.50767  | 0.89157  | -0.51640 |
| C  | 2.83799  | -0.39594 | -0.84595 |
| Cl | 2.97710  | -0.34647 | -2.57011 |
| C  | 1.80803  | -1.23176 | -0.28963 |
| H  | 1.48422  | -2.06202 | -0.92116 |
| C  | 1.70472  | -1.29249 | 1.13729  |
| H  | 1.26539  | -2.17428 | 1.61219  |
| C  | 2.61480  | -0.53155 | 1.94356  |
| H  | 2.55676  | -0.61835 | 3.03047  |

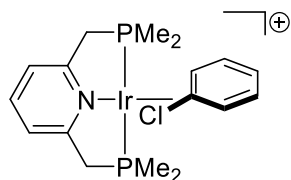

**(L1)Ir-SC-2**

46

**(L1)Ir-SC-2**

|    |          |          |          |
|----|----------|----------|----------|
| Ir | 0.05050  | 0.65815  | -0.60486 |
| P  | 0.05242  | 2.90417  | -0.97108 |
| P  | 0.54469  | -1.52288 | -0.11657 |
| N  | 1.96245  | 0.98420  | -0.02433 |
| C  | 1.86696  | 3.13060  | -1.20236 |
| C  | 2.60728  | 2.14291  | -0.35452 |
| C  | 3.91510  | 2.38482  | 0.04727  |
| C  | 4.60793  | 1.42444  | 0.77271  |
| C  | 3.95652  | 0.24100  | 1.09144  |
| C  | 2.63695  | 0.04577  | 0.70021  |
| C  | 1.90183  | -1.19995 | 1.08807  |
| C  | -0.71343 | 3.67205  | -2.43499 |
| H  | -0.42903 | 4.73046  | -2.52998 |
| H  | -0.41020 | 3.12489  | -3.33796 |
| H  | -1.80690 | 3.60645  | -2.33935 |
| C  | -0.40775 | 4.01844  | 0.39884  |
| H  | 0.11658  | 3.70602  | 1.31217  |
| H  | -0.15777 | 5.06445  | 0.16627  |
| H  | -1.48928 | 3.93763  | 0.57805  |
| C  | 1.30265  | -2.53028 | -1.43638 |

|    |          |          |          |
|----|----------|----------|----------|
| H  | 2.10167  | -1.95343 | -1.92139 |
| H  | 1.71136  | -3.47111 | -1.03849 |
| H  | 0.53923  | -2.75854 | -2.19348 |
| C  | -0.54851 | -2.70102 | 0.74331  |
| H  | 0.00588  | -3.60481 | 1.03678  |
| H  | -1.37130 | -2.98672 | 0.07297  |
| H  | -0.98439 | -2.22510 | 1.63149  |
| H  | 2.05244  | 2.89617  | -2.26511 |
| H  | 2.21698  | 4.15804  | -1.02449 |
| H  | 4.38596  | 3.32735  | -0.23408 |
| H  | 5.64028  | 1.59485  | 1.08288  |
| H  | 4.45772  | -0.54261 | 1.66107  |
| H  | 2.59048  | -2.04788 | 1.21903  |
| H  | 1.39621  | -1.03284 | 2.05502  |
| H  | -3.98466 | -1.82303 | -1.72083 |
| C  | -3.92757 | -1.58586 | -0.65704 |
| C  | -3.10379 | -0.56543 | -0.20127 |
| Cl | -2.15275 | 0.32447  | -1.39438 |
| C  | -2.99577 | -0.22150 | 1.14032  |
| H  | -2.32280 | 0.58288  | 1.44346  |
| C  | -3.75089 | -0.94378 | 2.06257  |
| H  | -3.68779 | -0.69166 | 3.12339  |
| C  | -4.58514 | -1.97853 | 1.63745  |
| H  | -5.17306 | -2.53884 | 2.36712  |
| C  | -4.67409 | -2.29630 | 0.28305  |
| H  | -5.32915 | -3.10369 | -0.05124 |

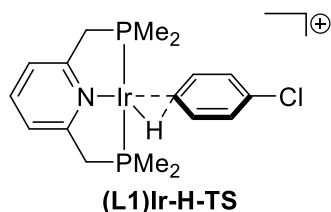

46

**(L1)Ir-H-TS**

|    |               |               |               |
|----|---------------|---------------|---------------|
| Ir | 0.2894193524  | -0.0688930085 | -0.3099103199 |
| P  | 0.1107903806  | 2.2180999014  | -0.4161578292 |
| P  | 1.1160415190  | -2.2140097556 | -0.2720662551 |
| N  | 2.2604494616  | 0.3743675626  | 0.2969101364  |
| C  | 1.9003729121  | 2.6630173347  | -0.4926919268 |
| C  | 2.7450988270  | 1.6405982512  | 0.1986669460  |
| C  | 4.0095959235  | 1.9678948853  | 0.6790321040  |
| C  | 4.8100973978  | 0.9789672594  | 1.2370729532  |
| C  | 4.3199973002  | -0.3188303270 | 1.3088428163  |
| C  | 3.0371551203  | -0.5972609712 | 0.8461839077  |
| C  | 2.4657106222  | -1.9770273460 | 0.9635445233  |
| C  | -0.5888846609 | 3.1631826463  | -1.8106630727 |
| H  | -0.2244340954 | 4.2009123585  | -1.7757878999 |
| H  | -0.2958874201 | 2.7016333386  | -2.7631786963 |
| H  | -1.6842396737 | 3.1822869702  | -1.7422169828 |
| C  | -0.5445440170 | 3.0691889672  | 1.0565365163  |

|    |               |               |               |
|----|---------------|---------------|---------------|
| H  | -0.0267184333 | 2.7044556086  | 1.9543872637  |
| H  | -0.4294497411 | 4.1604439704  | 0.9786142999  |
| H  | -1.6110085869 | 2.8177251963  | 1.1524377024  |
| C  | 1.9705436899  | -2.6968366305 | -1.8099504883 |
| H  | 2.6160160750  | -1.8728183133 | -2.1427701880 |
| H  | 2.5729090415  | -3.6054535985 | -1.6616766305 |
| H  | 1.2213815199  | -2.8811509948 | -2.5927436685 |
| C  | 0.3016707358  | -3.7563779739 | 0.2592127237  |
| H  | 1.0081019817  | -4.5976120635 | 0.2024346851  |
| H  | -0.5535403258 | -3.9638569678 | -0.3994361526 |
| H  | -0.0627037450 | -3.6636424756 | 1.2912538379  |
| H  | 2.1612109952  | 2.6590749768  | -1.5658941482 |
| H  | 2.1060232768  | 3.6759990479  | -0.1156498224 |
| H  | 4.3638251890  | 2.9960962060  | 0.5944050021  |
| H  | 5.8088153765  | 1.2170081415  | 1.6092268431  |
| H  | 4.9196552257  | -1.1228963952 | 1.7375144565  |
| H  | 3.2563802391  | -2.7399200285 | 0.8987667946  |
| H  | 1.9892943145  | -2.0860335888 | 1.9534954455  |
| C  | -4.4829480273 | -0.4935635779 | 0.5488587469  |
| C  | -3.5581403991 | -1.4044156378 | 1.0593715442  |
| H  | -3.8801805929 | -2.1566917412 | 1.7813834099  |
| C  | -2.2346383798 | -1.3524111674 | 0.6369168590  |
| C  | -1.7816347190 | -0.3592543873 | -0.2540261643 |
| C  | -2.7556808481 | 0.5061384626  | -0.7898734690 |
| H  | -2.4726563199 | 1.2285501222  | -1.5561407826 |
| C  | -4.0873184673 | 0.4555459631  | -0.3909842453 |
| H  | -4.8222519713 | 1.1424928414  | -0.8137583817 |
| H  | -0.8618989218 | -0.5419575943 | -1.3421813275 |
| Cl | -6.1303549055 | -0.5616768090 | 1.0649924278  |
| H  | -1.5362048485 | -2.0797376635 | 1.0478190968  |

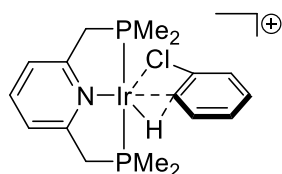

**(L1)Ir-H-TS'**

46

**(L1)Ir-H-TS'**

|    |               |               |               |
|----|---------------|---------------|---------------|
| Ir | 0.0731194393  | 0.1583378132  | 0.1132008161  |
| P  | -0.2250197147 | -2.1156774593 | -0.1858212144 |
| P  | 0.9362681706  | 2.2544564152  | 0.3396088371  |
| N  | 2.0896693600  | -0.3643786107 | -0.1004417659 |
| C  | 1.4443686240  | -2.6840235817 | 0.3556021072  |
| C  | 2.4818649643  | -1.6616346311 | 0.0094203026  |
| C  | 3.8142032788  | -2.0266490423 | -0.1626396237 |
| C  | 4.7678059584  | -1.0495120621 | -0.4173276183 |
| C  | 4.3618777942  | 0.2759715545  | -0.5125811025 |
| C  | 3.0153265411  | 0.5962124592  | -0.3685816638 |
| C  | 2.5419931916  | 2.0091053868  | -0.5370043459 |
| C  | -1.3771070245 | -3.2363565458 | 0.6601236720  |

|    |               |               |               |
|----|---------------|---------------|---------------|
| H  | -1.1420103519 | -4.2785796521 | 0.3976460514  |
| H  | -1.3123317775 | -3.0940630997 | 1.7456141337  |
| H  | -2.4029978224 | -3.0052360039 | 0.3435162745  |
| C  | -0.3506322141 | -2.6091026629 | -1.9381953563 |
| H  | 0.4427759260  | -2.1189899822 | -2.5192533743 |
| H  | -0.2766129300 | -3.7002414455 | -2.0572825184 |
| H  | -1.3199388996 | -2.2643205075 | -2.3264222788 |
| C  | 1.3891798252  | 2.7938763300  | 2.0208114690  |
| H  | 1.9592378588  | 1.9963636069  | 2.5165718202  |
| H  | 1.9856223293  | 3.7179294275  | 1.9949199301  |
| H  | 0.4721362716  | 2.9692983823  | 2.6006414672  |
| C  | 0.2021613982  | 3.7367864837  | -0.4200945496 |
| H  | 0.8594357221  | 4.6101198221  | -0.2971828709 |
| H  | -0.7627159279 | 3.9431875684  | 0.0648125072  |
| H  | 0.0205234695  | 3.5625193488  | -1.4891204873 |
| H  | 1.3845203258  | -2.7708088733 | 1.4547928124  |
| H  | 1.7157878259  | -3.6757956317 | -0.0359524075 |
| H  | 4.0954732947  | -3.0770804999 | -0.0770367925 |
| H  | 5.8190130288  | -1.3183917431 | -0.5407847898 |
| H  | 5.0813676858  | 1.0702352954  | -0.7158591006 |
| H  | 3.3186567592  | 2.7274260200  | -0.2341967567 |
| H  | 2.3332570650  | 2.1897129403  | -1.6059714485 |
| H  | -5.5560528085 | 0.6834516405  | -1.8327777570 |
| C  | -4.5621196913 | 0.6428628387  | -1.3826731851 |
| C  | -3.4669078709 | 1.2149183215  | -2.0309581349 |
| H  | -3.5959804963 | 1.7062179244  | -2.9977872226 |
| C  | -2.2058529208 | 1.1702748945  | -1.4455568645 |
| H  | -1.3587522727 | 1.6211788633  | -1.9666683661 |
| C  | -1.9831644055 | 0.5089934285  | -0.2210733687 |
| C  | -3.1202833183 | -0.0034149388 | 0.4306253533  |
| Cl | -2.9670909450 | -0.6638935100 | 2.0359931185  |
| C  | -4.3920391490 | 0.0444442524  | -0.1392907995 |
| H  | -5.2402329773 | -0.3710189854 | 0.4070468344  |
| H  | -1.1833130582 | 0.7791010236  | 0.9115164795  |

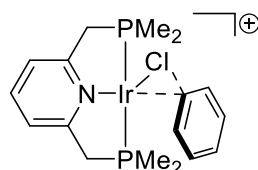

**(L1)Ir-Cl-TS**

46

**(L1)Ir-Cl-TS**

|    |               |               |               |
|----|---------------|---------------|---------------|
| Ir | -0.1286887046 | -0.0351098356 | -0.4871899343 |
| P  | 0.4174162963  | -2.2723668774 | -0.6262554990 |
| P  | 0.1414731467  | 2.2459504355  | -0.4337544435 |
| N  | 1.6776455094  | -0.0043136968 | 0.4591629858  |
| C  | 1.3094541914  | -2.3575694562 | 0.9874049176  |
| C  | 2.1364294332  | -1.1174369046 | 1.1001149509  |
| C  | 3.3403132991  | -1.1027407281 | 1.7969812945  |
| C  | 4.0989829148  | 0.0597993409  | 1.8444585832  |

|    |               |               |               |
|----|---------------|---------------|---------------|
| C  | 3.6506258525  | 1.1754900451  | 1.1462365154  |
| C  | 2.4537425876  | 1.1176605406  | 0.4423833057  |
| C  | 1.9844510435  | 2.2545013363  | -0.4070767394 |
| C  | -0.6220437308 | -3.7712493329 | -0.6813965113 |
| H  | 0.0090557339  | -4.6578135904 | -0.8384178895 |
| H  | -1.1774654424 | -3.8973848995 | 0.2568054452  |
| H  | -1.3381177543 | -3.6921357945 | -1.5119147211 |
| C  | 1.6907772833  | -2.6140517397 | -1.8883627232 |
| H  | 2.4512074756  | -1.8218976890 | -1.8637644949 |
| H  | 2.1661686303  | -3.5926475167 | -1.7242971843 |
| H  | 1.2179224503  | -2.6016819547 | -2.8806587182 |
| C  | -0.2605681458 | 3.2610779617  | 1.0319715021  |
| H  | 0.0602502038  | 2.7297203073  | 1.9389124741  |
| H  | 0.2515424274  | 4.2330818967  | 0.9733194890  |
| H  | -1.3417982910 | 3.4305789051  | 1.1013760912  |
| C  | -0.3323947026 | 3.2906206230  | -1.8458551063 |
| H  | 0.0928183204  | 4.3009822575  | -1.7558391098 |
| H  | -1.4285419544 | 3.3669849976  | -1.8831416939 |
| H  | 0.0102771629  | 2.8213009063  | -2.7777933131 |
| H  | 0.5160595188  | -2.3592267059 | 1.7560340383  |
| H  | 1.9240915150  | -3.2596024696 | 1.1241293092  |
| H  | 3.6698095196  | -2.0107811992 | 2.3036554206  |
| H  | 5.0381812894  | 0.0906434450  | 2.4001737330  |
| H  | 4.2350276125  | 2.0962170172  | 1.1225930791  |
| H  | 2.4162495590  | 3.2118083143  | -0.0812190518 |
| H  | 2.3079670526  | 2.0745085703  | -1.4470291679 |
| H  | -3.2393200458 | -2.1701765341 | 2.7606438009  |
| C  | -3.0856390848 | -1.2386044144 | 2.2108751099  |
| C  | -2.5380064139 | -1.2907808242 | 0.9317817025  |
| H  | -2.3170437982 | -2.2434296807 | 0.4583839598  |
| C  | -2.2969611392 | -0.0909939839 | 0.2435610998  |
| Cl | -2.1907986361 | -0.1648363791 | -1.6612679531 |
| C  | -2.7980040620 | 1.1212209299  | 0.7480152048  |
| H  | -2.7661905052 | 2.0190099522  | 0.1301981786  |
| C  | -3.3475510237 | 1.1500584718  | 2.0231846940  |
| H  | -3.7094852037 | 2.0990234647  | 2.4260976208  |
| C  | -3.4704395577 | -0.0220536706 | 2.7731292295  |
| H  | -3.9127698740 | 0.0075722919  | 3.7703799828  |

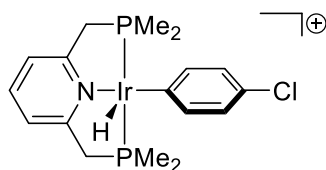

**(L1)Ir(H)(Ar)**

46

**(L1)Ir(H)(Ar)**

|    |              |               |               |
|----|--------------|---------------|---------------|
| H  | 0.4625790293 | -0.0545889842 | 1.5470520180  |
| Ir | 0.3494001501 | 0.0082719182  | 0.0183443522  |
| P  | 0.4453661570 | 2.2961190223  | 0.1778721883  |
| P  | 0.8350329766 | -2.2366069985 | -0.0567472495 |

|    |               |               |               |
|----|---------------|---------------|---------------|
| N  | 2.4912948590  | 0.2123526093  | -0.1363719395 |
| C  | 2.1051675934  | 2.5854708309  | -0.5976589605 |
| C  | 3.0402837758  | 1.4263881845  | -0.3779597955 |
| C  | 4.4207182322  | 1.5797570399  | -0.4686715233 |
| C  | 5.2397922012  | 0.4637387558  | -0.3369633789 |
| C  | 4.6634087021  | -0.7764051693 | -0.0891715956 |
| C  | 3.2794641981  | -0.8739433487 | 0.0298955834  |
| C  | 2.6241174686  | -2.1728226627 | 0.4170931017  |
| C  | -0.7163204181 | 3.3476406691  | -0.7402685136 |
| H  | -0.4299468243 | 4.4082904535  | -0.6943370495 |
| H  | -0.7649105565 | 3.0192320668  | -1.7875487921 |
| H  | -1.7142963057 | 3.2147215056  | -0.2979346879 |
| C  | 0.5390300967  | 3.0293526497  | 1.8404203548  |
| H  | 1.3247927029  | 2.5251140026  | 2.4194198190  |
| H  | 0.7526854167  | 4.1067891411  | 1.7867079956  |
| H  | -0.4223238583 | 2.8784117352  | 2.3514799408  |
| C  | 0.7954955127  | -3.1023271653 | -1.6620486029 |
| H  | 1.3428514274  | -2.5209890683 | -2.4172281529 |
| H  | 1.2470406548  | -4.1018137630 | -1.5758477449 |
| H  | -0.2483288665 | -3.2109348711 | -1.9891540812 |
| C  | 0.0514298098  | -3.3888690726 | 1.1057416965  |
| H  | 0.5102378319  | -4.3870862900 | 1.0608714248  |
| H  | -1.0137335498 | -3.4617729025 | 0.8429104826  |
| H  | 0.1244716631  | -2.9874265129 | 2.1253365418  |
| H  | 1.9106941279  | 2.6807698322  | -1.6810644868 |
| H  | 2.5632672101  | 3.5335046551  | -0.2782939622 |
| H  | 4.8431750604  | 2.5670653273  | -0.6597464345 |
| H  | 6.3239329457  | 0.5608939933  | -0.4222972821 |
| H  | 5.2795487892  | -1.6683937790 | 0.0333018544  |
| H  | 3.1909021195  | -3.0357966435 | 0.0364424800  |
| H  | 2.6384381969  | -2.2483199858 | 1.5190485085  |
| H  | -4.5119913076 | 0.8367250645  | 1.7183223527  |
| C  | -3.8877439511 | 0.3747920144  | 0.9511382879  |
| C  | -2.4991626914 | 0.4386644382  | 1.0262321691  |
| H  | -2.0564783911 | 0.9624296329  | 1.8786729436  |
| C  | -1.6665309112 | -0.1563862685 | 0.0587157259  |
| C  | -2.3154438842 | -0.8336479006 | -0.9920062309 |
| H  | -1.7281376740 | -1.3326672016 | -1.7713795027 |
| C  | -3.7048639091 | -0.8884166286 | -1.1014140912 |
| H  | -4.1825568157 | -1.4071526703 | -1.9345806357 |
| C  | -4.4873415910 | -0.2839578576 | -0.1221647063 |
| Cl | -6.2155527959 | -0.3564515283 | -0.2341368956 |

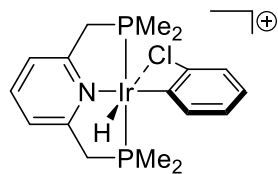

**(L1)Ir(H)(Ar)<sup>+</sup>**

46

**(L1)Ir(H)(Ar)<sup>+</sup>**

|    |               |               |               |
|----|---------------|---------------|---------------|
| H  | -0.2677536641 | -0.0525582217 | 1.8489713440  |
| Ir | -0.0286199203 | -0.0372176884 | 0.3150948296  |
| P  | -0.2026042854 | -2.3294646291 | 0.2860529895  |
| P  | -0.4719234338 | 2.2084594725  | 0.4032737097  |
| N  | -2.1210859401 | -0.1588080935 | -0.0872650357 |
| C  | -1.6941054438 | -2.4611520091 | -0.8011251014 |
| C  | -2.6342232538 | -1.3118892961 | -0.5697268347 |
| C  | -3.9892900066 | -1.4158123564 | -0.8778417139 |
| C  | -4.8124808358 | -0.3082953357 | -0.7150939089 |
| C  | -4.2674548284 | 0.8750543601  | -0.2289512078 |
| C  | -2.9138516595 | 0.9216985299  | 0.0961778458  |
| C  | -2.2955870857 | 2.1424797492  | 0.7128613800  |
| C  | 1.0560508955  | -3.3882300497 | -0.4819630855 |
| H  | 0.7039308210  | -4.4248615265 | -0.5829850807 |
| H  | 1.3188801852  | -2.9835131000 | -1.4687356623 |
| H  | 1.9562465573  | -3.3675060734 | 0.1484778026  |
| C  | -0.6578720830 | -3.1671368065 | 1.8348302881  |
| H  | -1.5233131800 | -2.6583224863 | 2.2812164111  |
| H  | -0.9023392752 | -4.2244430006 | 1.6564480490  |
| H  | 0.1839139493  | -3.1017881322 | 2.5382213278  |
| C  | -0.2672327192 | 3.1958986820  | -1.1116734195 |
| H  | -0.7862939239 | 2.7020696117  | -1.9446369336 |
| H  | -0.6640884961 | 4.2130896735  | -0.9793043969 |
| H  | 0.8027334718  | 3.2509449218  | -1.3578287150 |
| C  | 0.2113656031  | 3.2366436005  | 1.7335265462  |
| H  | -0.2275878177 | 4.2447970036  | 1.7334186557  |
| H  | 1.2980993751  | 3.3115534715  | 1.5857253650  |
| H  | 0.0284088243  | 2.7487252666  | 2.7002720034  |
| H  | -1.3074806147 | -2.4005198652 | -1.8342082244 |
| H  | -2.2153645660 | -3.4261954568 | -0.7111442157 |
| H  | -4.3864422265 | -2.3584662141 | -1.2576908349 |
| H  | -5.8743788264 | -0.3676728538 | -0.9636816337 |
| H  | -4.8898940279 | 1.7590292669  | -0.0831413284 |
| H  | -2.8176568105 | 3.0580968438  | 0.3980751877  |
| H  | -2.4068318881 | 2.0692381958  | 1.8093380928  |
| H  | 5.0815468791  | 0.2392230531  | 1.8350927195  |
| C  | 4.3295831951  | 0.1847277581  | 1.0442805895  |
| C  | 2.9743124227  | 0.1394179239  | 1.3862342194  |
| H  | 2.6810891797  | 0.1564415986  | 2.4391840853  |
| C  | 1.9917972181  | 0.0671773677  | 0.3908889427  |
| C  | 2.4731526394  | 0.0483385608  | -0.9167802783 |
| Cl | 1.1230104578  | -0.0437913193 | -2.0953983070 |
| C  | 3.7955006639  | 0.0901664163  | -1.3151888894 |
| H  | 4.0823320168  | 0.0710650205  | -2.3680540108 |
| C  | 4.7413517818  | 0.1603519010  | -0.2895159086 |
| H  | 5.8034337815  | 0.1963405827  | -0.5394104734 |

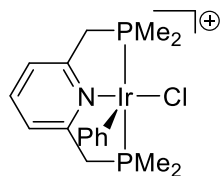

**(L1)Ir(CI)(Ph)**

46

**(L1)Ir(CI)(Ph)**

|    |               |               |               |
|----|---------------|---------------|---------------|
| Ir | 0.3768427002  | 0.2013618634  | 0.3009567185  |
| P  | -0.8654413731 | 2.0902487239  | 0.7776118296  |
| P  | 1.2796285537  | -1.9022716169 | 0.0057228422  |
| N  | -1.2301054460 | -0.8216764583 | 1.0582469298  |
| C  | -2.0541705808 | 1.3212271524  | 1.9648579505  |
| C  | -2.2000911963 | -0.1552914627 | 1.7401358779  |
| C  | -3.2993470772 | -0.8376182570 | 2.2554267559  |
| C  | -3.3944629494 | -2.2151590617 | 2.1058765670  |
| C  | -2.3834265367 | -2.8849995647 | 1.4293290616  |
| C  | -1.3163547046 | -2.1696196000 | 0.8950077090  |
| C  | -0.2895995660 | -2.8617215944 | 0.0485737863  |
| C  | -0.0919451802 | 3.4606765235  | 1.6797422095  |
| H  | -0.8412761717 | 4.1887433676  | 2.0228185400  |
| H  | 0.4702834327  | 3.0665518245  | 2.5371341548  |
| H  | 0.6226453491  | 3.9541699006  | 1.0062327375  |
| C  | -1.8559411819 | 2.8644869607  | -0.5319488058 |
| H  | -2.4594352248 | 2.1040798836  | -1.0444044545 |
| H  | -2.5050256664 | 3.6459009603  | -0.1114529307 |
| H  | -1.1728695553 | 3.3097805120  | -1.2690798576 |
| C  | 2.3120674798  | -2.5402891640 | 1.3588187478  |
| H  | 1.7794400112  | -2.4309403938 | 2.3141043583  |
| H  | 2.5614899080  | -3.5995951977 | 1.1992506366  |
| H  | 3.2372426923  | -1.9480913647 | 1.4047525123  |
| C  | 2.1254323943  | -2.3510635200 | -1.5301501238 |
| H  | 2.3275128499  | -3.4309538649 | -1.5717530419 |
| H  | 3.0745500554  | -1.7978233916 | -1.5709910581 |
| H  | 1.5060145627  | -2.0474451200 | -2.3849750061 |
| H  | -4.0737346689 | -0.2785582540 | 2.7824730284  |
| H  | -4.2496778813 | -2.7613826071 | 2.5094011214  |
| H  | -2.4265690950 | -3.9653313518 | 1.2833678526  |
| H  | -0.1594142747 | -3.9096151581 | 0.3546792801  |
| H  | -0.6565472520 | -2.8665048412 | -0.9936815721 |
| H  | 0.5109412149  | 0.8539359224  | -4.7163450899 |
| C  | -0.1308906482 | 0.4933491659  | -3.9086392304 |
| C  | -1.4079911176 | 0.0110942099  | -4.1883885177 |
| H  | -1.7776817418 | -0.0141305928 | -5.2154165178 |
| C  | -2.2070552206 | -0.4315457339 | -3.1395275774 |
| H  | -3.2142814972 | -0.8066300494 | -3.3379785779 |
| C  | -1.7399518697 | -0.3980993650 | -1.8219853831 |
| H  | -2.4146247714 | -0.7395356691 | -1.0359656058 |
| C  | -0.4524234246 | 0.0766010693  | -1.5360980064 |
| C  | 0.3464969727  | 0.5279581962  | -2.5991296407 |
| H  | 1.3467280007  | 0.9144926020  | -2.4032156565 |

|    |               |              |              |
|----|---------------|--------------|--------------|
| H  | -3.0383960831 | 1.8130182086 | 1.9646077808 |
| H  | -1.6262979969 | 1.4780979358 | 2.9707686072 |
| Cl | 2.3921821180  | 1.3218310932 | 0.0405506085 |

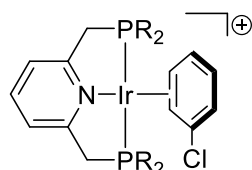

**(tBuL1)Ir-SC-1**

R = tBu

82

**(tBuL1)Ir-SC-1**

|    |               |               |               |
|----|---------------|---------------|---------------|
| Ir | -0.1186240283 | -0.1977797654 | -0.0202883607 |
| P  | 2.0907655705  | 0.6612189782  | 0.1710248995  |
| P  | -2.4512081468 | -0.2672196056 | -0.0781983369 |
| N  | -0.5327487563 | 1.8117433703  | -0.4950840708 |
| C  | 1.5702885657  | 2.4034802428  | 0.5380678102  |
| C  | 0.3480037675  | 2.7953357264  | -0.1992528063 |
| C  | 0.0976544813  | 4.1281650128  | -0.5202684596 |
| C  | -1.0949791789 | 4.4737900627  | -1.1382359388 |
| C  | -2.0139340984 | 3.4671891640  | -1.4103505868 |
| C  | -1.7119488829 | 2.1503433052  | -1.0809911009 |
| C  | -2.6737100454 | 1.0510880567  | -1.3521030770 |
| C  | 3.2115278110  | 0.4041963976  | 1.6911661717  |
| C  | 3.1098104889  | 0.8687310899  | -1.4174607735 |
| C  | -3.1753152946 | 0.4504605716  | 1.5323067917  |
| C  | -3.5606316537 | -1.6483857428 | -0.7743088001 |
| H  | 1.3278577283  | 2.4028961519  | 1.6136316834  |
| H  | 2.3753504355  | 3.1341815657  | 0.3906247532  |
| H  | 0.8418688735  | 4.8837200126  | -0.2655908921 |
| H  | -1.3115782367 | 5.5125795891  | -1.3956151344 |
| H  | -2.9703936290 | 3.6897263793  | -1.8849363155 |
| H  | -3.7006862252 | 1.4278439218  | -1.4484447664 |
| H  | -2.3979822082 | 0.5701828611  | -2.3029735925 |
| H  | 3.0040659197  | -3.8396517829 | 1.3498495253  |
| C  | 2.1802056062  | -3.3578639671 | 0.8189177533  |
| C  | 2.2038919035  | -3.3310322293 | -0.6031293465 |
| H  | 3.0404991398  | -3.7662401910 | -1.1520351292 |
| C  | 1.1365910945  | -2.8087635427 | -1.2774027084 |
| Cl | 1.0600357694  | -2.8747276297 | -3.0068921251 |
| C  | -0.0100488132 | -2.2780997552 | -0.6008521544 |
| H  | -0.9387627266 | -2.3882692903 | -1.1545110072 |
| C  | 0.0003547359  | -2.2668414978 | 0.8306112697  |
| H  | -0.9422743066 | -2.2979893960 | 1.3817134637  |
| C  | 1.1235834308  | -2.8360762665 | 1.5148222282  |
| H  | 1.0842902921  | -2.9386725092 | 2.6013085768  |
| C  | -4.4070099232 | 1.3262958193  | 1.2995805709  |
| H  | -4.7501838853 | 1.7182026815  | 2.2704533637  |
| H  | -4.1753232786 | 2.1979000742  | 0.6700099984  |
| H  | -5.2483984031 | 0.7869521552  | 0.8503184249  |

|   |               |               |               |
|---|---------------|---------------|---------------|
| C | -2.0933190479 | 1.3165679277  | 2.1928940835  |
| H | -1.8820036414 | 2.2283472072  | 1.6188745752  |
| H | -2.4534622687 | 1.6285007906  | 3.1859977500  |
| H | -1.1486070896 | 0.7628683870  | 2.3154454607  |
| C | -3.5029069337 | -0.6935963567 | 2.4945202255  |
| H | -4.3435898663 | -1.3114877165 | 2.1549171188  |
| H | -2.6334318460 | -1.3463495783 | 2.6665837496  |
| H | -3.7858153587 | -0.2674286455 | 3.4697497728  |
| C | -5.0442360214 | -1.2793959788 | -0.6934949952 |
| H | -5.4212025373 | -1.2651321250 | 0.3369105256  |
| H | -5.2657054843 | -0.3092782470 | -1.1611238450 |
| H | -5.6231239567 | -2.0415980867 | -1.2387284792 |
| C | -3.2120112956 | -1.8378801474 | -2.2602012904 |
| H | -3.6661713311 | -2.7783065137 | -2.6085260648 |
| H | -3.6267172428 | -1.0337056793 | -2.8837369025 |
| H | -2.1339946742 | -1.9006421554 | -2.4678809281 |
| C | -3.3391772021 | -2.9717492177 | -0.0301738032 |
| H | -4.0466013870 | -3.7164279663 | -0.4275720312 |
| H | -2.3312211292 | -3.3794127563 | -0.1715564343 |
| H | -3.5260134029 | -2.8910401955 | 1.0471024802  |
| C | 2.2808857333  | 0.0525042272  | 2.8551548527  |
| H | 1.5255890363  | 0.8330644945  | 3.0376608454  |
| H | 1.7498233078  | -0.8883939656 | 2.6848321965  |
| H | 2.8773562560  | -0.0454620318 | 3.7762024821  |
| C | 3.9967106442  | 1.6626349854  | 2.0854886302  |
| H | 4.6406252958  | 2.0448963337  | 1.2853206804  |
| H | 3.3516471369  | 2.4789920213  | 2.4363152086  |
| H | 4.6525536635  | 1.3972745508  | 2.9297469534  |
| C | 4.2118393328  | -0.7253836281 | 1.4528469368  |
| H | 3.7276849901  | -1.6352575373 | 1.0824960336  |
| H | 4.9945533274  | -0.4293074534 | 0.7415930039  |
| H | 4.7096464513  | -0.9727607555 | 2.4036835059  |
| C | 3.6235111617  | -0.4826490909 | -1.9152227233 |
| H | 2.8036602618  | -1.1322538666 | -2.2383610849 |
| H | 4.2599974681  | -0.3078133350 | -2.7972445050 |
| H | 4.2291301249  | -1.0180157316 | -1.1741518290 |
| C | 2.1452736692  | 1.4231298450  | -2.4727318296 |
| H | 1.2413814648  | 0.8003613826  | -2.5572962143 |
| H | 1.8408755190  | 2.4592123223  | -2.2649123694 |
| H | 2.6516881135  | 1.4234111951  | -3.4507880442 |
| C | 4.2932833106  | 1.8231965102  | -1.2611856682 |
| H | 4.7293811915  | 2.0035790380  | -2.2565851042 |
| H | 4.0112131851  | 2.8047184166  | -0.8542295975 |
| H | 5.0899872555  | 1.4007729048  | -0.6347109139 |

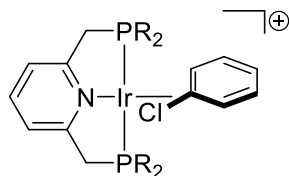

**(tBuL1)Ir-SC-2**

R = tBu

82

**(tBuL1)Ir-SC-2**

|    |               |               |               |
|----|---------------|---------------|---------------|
| Ir | -0.0232229702 | -0.1736654247 | 0.0828599307  |
| P  | -2.2133171826 | 0.5723871495  | 0.1108324103  |
| P  | 1.9242243583  | -1.4308966303 | 0.0923006597  |
| N  | -0.8301209809 | -1.8864798620 | -0.6453623275 |
| C  | -3.0179746993 | -1.0894403000 | 0.1138718240  |
| C  | -2.1730676809 | -2.1049336700 | -0.5782671270 |
| C  | -2.7492652765 | -3.2663726730 | -1.0842833799 |
| C  | -1.9493704794 | -4.2549143649 | -1.6404073572 |
| C  | -0.5770711867 | -4.0479000991 | -1.6709616059 |
| C  | -0.0403912184 | -2.8623688347 | -1.1785218855 |
| C  | 1.4283845064  | -2.6150968504 | -1.2375253395 |
| C  | -2.8924472135 | 1.3457351672  | 1.6967397046  |
| C  | -2.8663523064 | 1.4080253171  | -1.4486894851 |
| C  | 2.0669300239  | -2.4823563032 | 1.6648904133  |
| C  | 3.6085004842  | -0.7993359917 | -0.4979651503 |
| H  | -3.0808524646 | -1.3767964203 | 1.1764953088  |
| H  | -4.0448898942 | -1.0927277697 | -0.2781579785 |
| H  | -3.8309296659 | -3.3901775618 | -1.0163576143 |
| H  | -2.3866884335 | -5.1744420658 | -2.0341103361 |
| H  | 0.0964379328  | -4.7981428657 | -2.0872619335 |
| H  | 1.9899184137  | -3.5592432901 | -1.2475753228 |
| H  | 1.6501243578  | -2.0916120765 | -2.1796594214 |
| H  | 1.9288501356  | 4.3816910962  | 1.5112046709  |
| C  | 1.9294562025  | 4.1747426545  | 0.4395136674  |
| C  | 1.4424665620  | 2.9716698228  | -0.0555408273 |
| Cl | 0.8359708708  | 1.7839521839  | 1.1016849952  |
| C  | 1.4253030527  | 2.6611195335  | -1.4076469329 |
| H  | 1.0185089636  | 1.6931888935  | -1.7163010448 |
| C  | 1.9235549553  | 3.6033710363  | -2.3057036931 |
| H  | 1.9203184730  | 3.3817980624  | -3.3752470131 |
| C  | 2.4201340721  | 4.8212281949  | -1.8423620768 |
| H  | 2.8086790037  | 5.5562959919  | -2.5499826672 |
| C  | 2.4213257886  | 5.1041560004  | -0.4761341181 |
| H  | 2.8099544847  | 6.0581014143  | -0.1134423987 |
| C  | 3.4499905072  | -0.3810395192 | -1.9653263825 |
| H  | 4.3092404272  | 0.2446434512  | -2.2523633854 |
| H  | 3.4388241774  | -1.2437723766 | -2.6465481809 |
| H  | 2.5392779946  | 0.2113655199  | -2.1339107253 |
| C  | 4.7149071650  | -1.8493480817 | -0.4059257563 |
| H  | 5.6195174794  | -1.4546430359 | -0.8955640562 |
| H  | 4.9860035055  | -2.0806287826 | 0.6327167326  |
| H  | 4.4508849330  | -2.7867749047 | -0.9178960777 |

|   |               |               |               |
|---|---------------|---------------|---------------|
| C | 2.7581834281  | -1.6461061114 | 2.7436891334  |
| H | 3.8268323155  | -1.4975895718 | 2.5381612975  |
| H | 2.2826420273  | -0.6591133177 | 2.8571596443  |
| H | 2.6806942224  | -2.1667910379 | 3.7111846613  |
| C | 2.7878576381  | -3.8151437285 | 1.4690733181  |
| H | 3.8351235806  | -3.7048545549 | 1.1674060298  |
| H | 2.7787558918  | -4.3650518041 | 2.4237900565  |
| H | 2.2783742047  | -4.4529767361 | 0.7320971656  |
| C | 0.6335754827  | -2.7763566737 | 2.1259570288  |
| H | 0.6716198447  | -3.3016709701 | 3.0934891044  |
| H | 0.0535935733  | -1.8475611643 | 2.2403630675  |
| H | 0.0956760056  | -3.4261125933 | 1.4199732108  |
| C | -2.1261269853 | 0.6933638117  | 2.8538055333  |
| H | -1.0504500165 | 0.9076069191  | 2.8130343991  |
| H | -2.5178826146 | 1.0812995928  | 3.8075032933  |
| H | -2.2439528585 | -0.4005352794 | 2.8725322376  |
| C | -2.6328572405 | 2.8540631759  | 1.7070864696  |
| H | -1.5835300674 | 3.0996874095  | 1.4889828297  |
| H | -3.2717195783 | 3.3870053474  | 0.9899222086  |
| H | -2.8671567209 | 3.2504637361  | 2.7076655021  |
| C | -4.3876448499 | 1.0813925263  | 1.8948300248  |
| H | -4.7042632879 | 1.5429250267  | 2.8437148177  |
| H | -5.0067711043 | 1.5125419427  | 1.0999831401  |
| H | -4.6202158963 | 0.0096178045  | 1.9693852117  |
| C | -2.1325291771 | 2.7342892086  | -1.6562660412 |
| H | -1.0440783880 | 2.5978709505  | -1.6570518985 |
| H | -2.4197337314 | 3.1563263731  | -2.6323853567 |
| H | -2.3793131149 | 3.4792759990  | -0.8901282329 |
| C | -4.3746790913 | 1.6440400359  | -1.4474952440 |
| H | -4.6724030884 | 2.4187225661  | -0.7282139280 |
| H | -4.6826213487 | 1.9952212750  | -2.4453203869 |
| H | -4.949907167  | 0.7307704016  | -1.2347186946 |
| C | -2.4947158541 | 0.4628297716  | -2.5978153039 |
| H | -1.4179467622 | 0.2322052955  | -2.5938517830 |
| H | -3.0504145791 | -0.4858228512 | -2.5604683000 |
| H | -2.7412075426 | 0.9477251982  | -3.5554503739 |
| C | 3.9999332642  | 0.4389332891  | 0.3142029722  |
| H | 4.9884932642  | 0.7871528617  | -0.0243061232 |
| H | 3.2926013958  | 1.2617777946  | 0.1605468030  |
| H | 4.0703029355  | 0.2428090428  | 1.3909786783  |

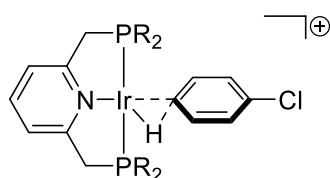

**(tBuL1)Ir-H-TS**

R = tBu

82

**(tBuL1)Ir-H-TS**

|    |              |              |               |
|----|--------------|--------------|---------------|
| Ir | 0.2497410792 | 0.0631522163 | -0.0584150591 |
|----|--------------|--------------|---------------|

|    |               |               |               |
|----|---------------|---------------|---------------|
| P  | -1.1997413183 | 1.8998517227  | -0.1869240138 |
| P  | 2.1696584590  | -1.2388239975 | -0.0305876890 |
| N  | 1.5893245715  | 1.4987351120  | 0.6880417378  |
| C  | 0.0921751520  | 3.2240413707  | -0.1632795301 |
| C  | 1.3086391397  | 2.8210973000  | 0.5966944744  |
| C  | 2.1602489269  | 3.7827983923  | 1.1356702845  |
| C  | 3.3411964757  | 3.3880310714  | 1.7490465478  |
| C  | 3.6437573702  | 2.0330416439  | 1.8035798891  |
| C  | 2.7515286131  | 1.1060655401  | 1.2731196108  |
| C  | 3.0440099528  | -0.3570472541 | 1.3398306194  |
| C  | -2.1136719726 | 2.3106348902  | -1.7931232769 |
| C  | -2.2380520883 | 2.2450807219  | 1.3492285929  |
| C  | 3.2264381494  | -0.9239661686 | -1.5761329274 |
| C  | 2.1953387263  | -3.0563065557 | 0.4854636858  |
| H  | -0.2871373285 | 4.1971632613  | 0.1779856451  |
| H  | 1.8948102421  | 4.8373428662  | 1.0509064480  |
| H  | 4.0239927704  | 4.1282774946  | 2.1713886198  |
| H  | 4.5666716794  | 1.6805130300  | 2.2656276143  |
| H  | 4.1260765395  | -0.5429385187 | 1.3819491696  |
| H  | 2.6093160246  | -0.7567070073 | 2.2687385074  |
| C  | -3.6859523026 | -2.8739308570 | 0.1269739012  |
| C  | -2.7620310004 | -2.7294173522 | 1.1638211797  |
| H  | -2.9499959039 | -3.2041321979 | 2.1283774533  |
| C  | -1.6094108948 | -1.9812849354 | 0.9591247820  |
| C  | -1.3650993963 | -1.3155729788 | -0.2595974048 |
| C  | -2.2978820590 | -1.5151477281 | -1.2899642410 |
| H  | -2.1244219873 | -1.0744160412 | -2.2733394653 |
| C  | -3.4501194463 | -2.2789205318 | -1.1072722254 |
| H  | -4.1605183349 | -2.4156518600 | -1.9242067526 |
| H  | -0.2432718163 | -1.1112253829 | -1.0490762485 |
| Cl | -5.1180426071 | -3.8099878207 | 0.3772104823  |
| H  | -0.9104623490 | -1.8727781956 | 1.7889688098  |
| C  | 2.9671607552  | 0.5182672806  | -2.0287839404 |
| H  | 3.4863940021  | 0.6855104590  | -2.9856147721 |
| H  | 1.8911736095  | 0.7065794115  | -2.1645867368 |
| H  | 3.3564100115  | 1.2552875584  | -1.3120003614 |
| C  | 2.7597514784  | -1.8649129662 | -2.6887437001 |
| H  | 3.0012469768  | -2.9155328693 | -2.4815456556 |
| H  | 1.6760006565  | -1.7814564677 | -2.8636625647 |
| H  | 3.2681222785  | -1.5912722222 | -3.6265472846 |
| C  | 4.7274124434  | -1.0829340581 | -1.3297345212 |
| H  | 5.0149657409  | -2.0932705372 | -1.0196581259 |
| H  | 5.2626823655  | -0.8632858954 | -2.2671406173 |
| H  | 5.0979460864  | -0.3695222217 | -0.5790617079 |
| C  | 3.5698813185  | -3.7127515746 | 0.3550910815  |
| H  | 3.5170399001  | -4.7250070922 | 0.7861601192  |
| H  | 3.8873725586  | -3.8238065881 | -0.6900286969 |
| H  | 4.3506531349  | -3.1661922976 | 0.9047153902  |
| C  | 1.7684796326  | -3.1214296971 | 1.9568697055  |
| H  | 1.5098482591  | -4.1620245557 | 2.2059773983  |
| H  | 2.5761328004  | -2.8176354416 | 2.6380357827  |
| H  | 0.8845587035  | -2.5037182822 | 2.1653111950  |

|   |               |               |               |
|---|---------------|---------------|---------------|
| C | 1.1691861799  | -3.8185785891 | -0.3610428704 |
| H | 1.1751520755  | -4.8766819922 | -0.0556048514 |
| H | 0.1508634871  | -3.4376350506 | -0.2129579801 |
| H | 1.3956700891  | -3.7871938753 | -1.4339106300 |
| H | 0.3923466343  | 3.3526806778  | -1.2165933286 |
| C | -1.2641618929 | 1.7244737295  | -2.9258250267 |
| H | -1.1781310345 | 0.6327612952  | -2.8595637138 |
| H | -1.7251313714 | 1.9786367010  | -3.8933924952 |
| H | -0.2408669033 | 2.1304783227  | -2.9317308097 |
| C | -3.5085125860 | 1.6825006170  | -1.7999476903 |
| H | -3.4973321207 | 0.6219716513  | -1.5203166070 |
| H | -4.1948532610 | 2.2089225505  | -1.1229462663 |
| H | -3.9304602143 | 1.7603039586  | -2.8143627232 |
| C | -2.2502094192 | 3.8205720533  | -2.0201435519 |
| H | -2.8251619784 | 3.9805111722  | -2.9459143107 |
| H | -2.7888576083 | 4.3282019984  | -1.2109301993 |
| H | -1.2815348663 | 4.3197303922  | -2.1591410382 |
| C | -3.2697226677 | 1.1293107714  | 1.5370920944  |
| H | -2.7985852074 | 0.1398273717  | 1.5891301190  |
| H | -3.8038633458 | 1.2986274385  | 2.4854133040  |
| H | -4.0202836629 | 1.1056934662  | 0.7381416847  |
| C | -2.9379527053 | 3.6021451966  | 1.3242401885  |
| H | -3.7284184713 | 3.6464940461  | 0.5634929923  |
| H | -3.4177072353 | 3.7745535626  | 2.3007367795  |
| H | -2.2433607279 | 4.4381956407  | 1.1540470555  |
| C | -1.2531032286 | 2.1974973408  | 2.5238701415  |
| H | -0.6863039434 | 1.2531869797  | 2.5357573535  |
| H | -0.5366140393 | 3.0321463305  | 2.5089964461  |
| H | -1.8165874328 | 2.2682042567  | 3.4673062739  |

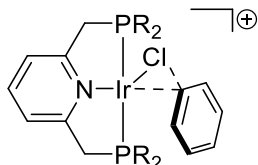

**(tBuL1)Ir-Cl-TS**

R = tBu

82

**(tBuL1)Ir-Cl-TS**

|    |               |               |               |
|----|---------------|---------------|---------------|
| Ir | 0.0660105518  | 0.1169787279  | 0.1939100569  |
| P  | 2.4070004688  | -0.1261481114 | 0.0405402287  |
| P  | -2.1809494373 | -0.5409172639 | 0.3539411925  |
| N  | 0.1703944592  | -1.5505431716 | -0.9969336440 |
| C  | 2.3975419707  | -0.8457325892 | -1.6662986126 |
| C  | 1.2573516695  | -1.7934998948 | -1.7782606717 |
| C  | 1.3244771848  | -2.9097761245 | -2.6072798896 |
| C  | 0.2795740883  | -3.8239811775 | -2.6247714122 |
| C  | -0.7807539237 | -3.6260385930 | -1.7485951105 |
| C  | -0.7978168990 | -2.5058821178 | -0.9253693918 |
| C  | -1.8131924730 | -2.3375632925 | 0.1441843783  |
| C  | 3.8015651925  | 1.1772501637  | -0.0729409264 |

|    |               |               |               |
|----|---------------|---------------|---------------|
| C  | 2.9304340170  | -1.5191339493 | 1.2354438244  |
| C  | -3.4017164275 | -0.2389611666 | -1.0940431167 |
| C  | -3.0377622727 | -0.5124030539 | 2.0386002095  |
| H  | 2.2240917683  | 0.0156763055  | -2.3295417035 |
| H  | 3.3402869109  | -1.3212432003 | -1.9710905006 |
| H  | 2.2079379612  | -3.0506282217 | -3.2312686403 |
| H  | 0.3087796410  | -4.6955694134 | -3.2814855608 |
| H  | -1.5909685089 | -4.3521961671 | -1.6706218595 |
| H  | -2.6914946087 | -2.9711844089 | -0.0188369255 |
| H  | -1.3439396348 | -2.6537824089 | 1.0888297974  |
| H  | 0.8950377322  | 4.2108263222  | -2.6117688760 |
| C  | 0.1407882657  | 3.8092229961  | -1.9306930281 |
| C  | 0.5465201686  | 2.9743254061  | -0.8926840757 |
| H  | 1.5956517657  | 2.7674501490  | -0.7288596100 |
| C  | -0.4122928047 | 2.4079683331  | -0.0475390986 |
| Cl | 0.1070053100  | 1.9164594370  | 1.7372374908  |
| C  | -1.7445912470 | 2.8384353338  | -0.1230120068 |
| H  | -2.4571653132 | 2.5109746291  | 0.6297444621  |
| C  | -2.1307481687 | 3.6907702512  | -1.1497170863 |
| H  | -3.1755222974 | 4.0041076858  | -1.2151451795 |
| C  | -1.1997015905 | 4.1609754426  | -2.0779708580 |
| H  | -1.5104153067 | 4.8331444439  | -2.8795967800 |
| C  | -4.4410676461 | 0.8403013210  | -0.7841681795 |
| H  | -3.9947420679 | 1.7936239622  | -0.4874355839 |
| H  | -5.0263853903 | 1.0295023929  | -1.6978319170 |
| H  | -5.1499897679 | 0.5261602973  | -0.0064301644 |
| C  | -4.1612488350 | -1.5146688957 | -1.4773418235 |
| H  | -4.7274217119 | -1.9506300502 | -0.6424845170 |
| H  | -4.8891489992 | -1.2577013173 | -2.2628225317 |
| H  | -3.5017897770 | -2.2847528679 | -1.9006799145 |
| C  | -2.5501037200 | 0.1907722521  | -2.2948505017 |
| H  | -1.9910602446 | 1.1139159372  | -2.1008000435 |
| H  | -1.8299309254 | -0.5875645845 | -2.5842652918 |
| H  | -3.2131624255 | 0.3633272108  | -3.1577711126 |
| C  | -3.3933633495 | 0.9210048169  | 2.4431886226  |
| H  | -2.4956812377 | 1.5486173616  | 2.5273428731  |
| H  | -4.1029329335 | 1.3985971436  | 1.7563629590  |
| H  | -3.8692366989 | 0.8989027595  | 3.4361180556  |
| C  | -4.2893389625 | -1.3904236054 | 2.0553223632  |
| H  | -4.7062092436 | -1.4013851187 | 3.0748616580  |
| H  | -5.0747019438 | -1.0151921633 | 1.3866264125  |
| H  | -4.0727549425 | -2.4338918949 | 1.7843552626  |
| C  | -2.0256952960 | -1.0464546884 | 3.0602649632  |
| H  | -1.0648587434 | -0.5157823741 | 2.9945806878  |
| H  | -2.4322475649 | -0.8978346419 | 4.0727104864  |
| H  | -1.8366462839 | -2.1234910884 | 2.9480540428  |
| C  | 1.7454606656  | -2.4664665864 | 1.4647575288  |
| H  | 2.0196870717  | -3.1698942434 | 2.2662993914  |
| H  | 0.8432684906  | -1.9158268846 | 1.7721948271  |
| H  | 1.5083281144  | -3.0636987696 | 0.5737579294  |
| C  | 3.2492764859  | -0.8678195949 | 2.5855206235  |
| H  | 4.1465371616  | -0.2377132371 | 2.5639930712  |

|   |              |               |               |
|---|--------------|---------------|---------------|
| H | 2.4047218552 | -0.2565059409 | 2.9409272072  |
| H | 3.4236465238 | -1.6575023683 | 3.3330225969  |
| C | 4.0933893510 | -2.3703975174 | 0.7227916194  |
| H | 5.0313713126 | -1.8198947074 | 0.6106217769  |
| H | 4.2765302446 | -3.1842472874 | 1.4423699136  |
| H | 3.8513625775 | -2.8456821614 | -0.2398341243 |
| C | 3.5727280615 | 2.2408684174  | 1.0080988371  |
| H | 4.3753060956 | 2.9924220475  | 0.9464166442  |
| H | 2.6147216542 | 2.7629878235  | 0.9042315891  |
| H | 3.5986752143 | 1.8130359008  | 2.0188749644  |
| C | 5.2086746480 | 0.5988206171  | 0.1018879934  |
| H | 5.9307564602 | 1.4140232696  | -0.0638633482 |
| H | 5.3964893202 | 0.2050192930  | 1.1077084158  |
| H | 5.4335670891 | -0.1845984633 | -0.6350940577 |
| C | 3.7859322408 | 1.8111022211  | -1.4738310999 |
| H | 4.2588444501 | 1.1500954718  | -2.2137747901 |
| H | 2.7894390628 | 2.0667165562  | -1.8526397877 |
| H | 4.3762630760 | 2.7400054244  | -1.4454071314 |

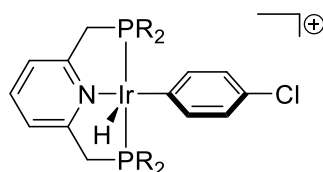

**(tBuL1)Ir(H)(Ar)**

R = tBu

82

**(tBuL1)Ir(H)(Ar)**

|    |               |               |               |
|----|---------------|---------------|---------------|
| H  | 0.0985007061  | 0.2947131644  | 1.6168733188  |
| Ir | 0.1838266846  | 0.1269010174  | 0.0991830293  |
| P  | -0.8291088183 | 2.2099678575  | -0.1420686238 |
| P  | 1.7027139357  | -1.6056354828 | 0.3267233574  |
| N  | 1.9762531951  | 1.3154825121  | -0.0110263940 |
| C  | 0.5956228622  | 3.1246358031  | -0.9053055960 |
| C  | 1.9264175449  | 2.5834412585  | -0.4741202365 |
| C  | 3.0852652121  | 3.3499423333  | -0.5888111427 |
| C  | 4.3099105355  | 2.7919494514  | -0.2433017530 |
| C  | 4.3476317181  | 1.4852146626  | 0.2316077705  |
| C  | 3.1592755944  | 0.7697896859  | 0.3558973447  |
| C  | 3.1331354444  | -0.6037672454 | 0.9526787134  |
| C  | -2.1908849177 | 2.3873604666  | -1.4263544218 |
| C  | -1.1802894318 | 3.1276844840  | 1.4663380065  |
| C  | 2.2462242572  | -2.1996709364 | -1.3859179353 |
| C  | 1.5023135953  | -2.9813061566 | 1.5918637292  |
| H  | 0.4983659156  | 2.9707628387  | -1.9931098825 |
| H  | 0.5418408427  | 4.2111765215  | -0.7434831629 |
| H  | 3.0200348367  | 4.3728169194  | -0.9628102063 |
| H  | 5.2297033079  | 3.3728148239  | -0.3391430695 |
| H  | 5.2903825547  | 1.0211325362  | 0.5249911129  |
| H  | 4.1047041604  | -1.1037251615 | 0.8472106376  |
| H  | 2.9472335232  | -0.4922157263 | 2.0330970871  |

|    |               |               |               |
|----|---------------|---------------|---------------|
| H  | -4.0868267574 | -2.1198307695 | 2.1129123038  |
| C  | -3.4583304134 | -2.0128253346 | 1.2267718045  |
| C  | -2.3309440854 | -1.1924445299 | 1.2488817779  |
| H  | -2.1059743557 | -0.6729816440 | 2.1825040867  |
| C  | -1.4914845123 | -1.0293221885 | 0.1314469283  |
| C  | -1.8571006146 | -1.7559526945 | -1.0190224715 |
| H  | -1.2456841338 | -1.6944373728 | -1.9258951634 |
| C  | -2.9814755034 | -2.5786483603 | -1.0692721613 |
| H  | -3.2349720507 | -3.1256971647 | -1.9792346618 |
| C  | -3.7825419580 | -2.7043981171 | 0.0623234627  |
| Cl | -5.1822061429 | -3.7288731896 | 0.0217977959  |
| C  | 3.7456054857  | -2.4820705173 | -1.4750487286 |
| H  | 4.0731213622  | -3.2509957100 | -0.7619499653 |
| H  | 3.9822097651  | -2.8511667140 | -2.4857452800 |
| H  | 4.3496169247  | -1.5772859591 | -1.3144498133 |
| C  | 1.4583584859  | -3.4434773435 | -1.7983934101 |
| H  | 1.7628234709  | -4.3291200430 | -1.2259263085 |
| H  | 0.3735236625  | -3.3117537504 | -1.6822351603 |
| H  | 1.6606255719  | -3.6556817093 | -2.8601486469 |
| C  | 1.8943703542  | -1.0499730713 | -2.3424170510 |
| H  | 2.0847511220  | -1.3631630290 | -3.3813409306 |
| H  | 0.8224391222  | -0.7793108105 | -2.2882472342 |
| H  | 2.4923932478  | -0.1476184996 | -2.1554161642 |
| C  | 1.2438105826  | -2.3011620232 | 2.9415583789  |
| H  | 0.3801393489  | -1.6222234227 | 2.8915469727  |
| H  | 1.0124402232  | -3.0783431129 | 3.6858121930  |
| H  | 2.1126132199  | -1.7448107918 | 3.3212140389  |
| C  | 0.2725192389  | -3.8338341252 | 1.2591053352  |
| H  | 0.1131869045  | -4.5445671574 | 2.0850015002  |
| H  | -0.6349390863 | -3.2235014002 | 1.1611457597  |
| H  | 0.3946385798  | -4.4228790269 | 0.3441038948  |
| C  | 2.7558875795  | -3.8522792230 | 1.6714957241  |
| H  | 2.6298677948  | -4.5942355370 | 2.4755813598  |
| H  | 2.9303823145  | -4.4102404693 | 0.7412076486  |
| H  | 3.6608678292  | -3.2712414570 | 1.9037604409  |
| C  | -1.7908452336 | 1.4552991648  | -2.5762739573 |
| H  | -1.7503915612 | 0.4091684483  | -2.2476875070 |
| H  | -2.5487073095 | 1.5223767694  | -3.3722522955 |
| H  | -0.8253700088 | 1.7271223390  | -3.0312176377 |
| C  | -2.3413584181 | 3.8074719622  | -1.9746219259 |
| H  | -3.1007019437 | 3.7946557364  | -2.7724266371 |
| H  | -2.6763466761 | 4.5274048757  | -1.2201212956 |
| H  | -1.4117207038 | 4.1856600844  | -2.4245218291 |
| C  | -3.5093415476 | 1.8939318831  | -0.8242454011 |
| H  | -3.4126232178 | 0.8855628071  | -0.3948748393 |
| H  | -3.8905010734 | 2.5729879173  | -0.0489635082 |
| H  | -4.2703755950 | 1.8475581395  | -1.6187799495 |
| C  | -2.0623677135 | 2.2479764231  | 2.3548102436  |
| H  | -1.5393164304 | 1.3253169779  | 2.6397331812  |
| H  | -2.3045484855 | 2.7973122787  | 3.2779633551  |
| H  | -3.0067215660 | 1.9638103019  | 1.8735764035  |
| C  | -1.8452624162 | 4.4843806296  | 1.2438279256  |

|   |               |              |              |
|---|---------------|--------------|--------------|
| H | -2.8703908527 | 4.3870201748 | 0.8628117567 |
| H | -1.9064078129 | 5.0120193598 | 2.2086613363 |
| H | -1.2762409772 | 5.1286926466 | 0.5571685209 |
| C | 0.1661363661  | 3.3387906518 | 2.1682563341 |
| H | 0.7176558242  | 2.3963245008 | 2.2982416076 |
| H | 0.8132939689  | 4.0496735472 | 1.6348211246 |
| H | -0.0196247803 | 3.7570860682 | 3.1696510223 |

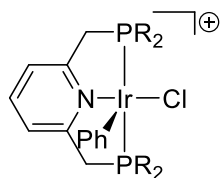

**(tBuL1)Ir(Cl)(Ph)**

R = tBu

82

**(tBuL1)Ir(Cl)(Ph)**

|    |               |               |               |
|----|---------------|---------------|---------------|
| Ir | -0.0064331912 | -0.0087245518 | 0.2959029776  |
| P  | 2.3230729046  | 0.4255393985  | 0.1558248229  |
| P  | -2.3379334338 | 0.0231434369  | 0.1001562744  |
| N  | -0.0568080169 | 0.6157377180  | -1.6712311872 |
| C  | 2.2629906302  | 1.4050984174  | -1.4116199375 |
| C  | 1.0503275283  | 1.1487357727  | -2.2500179182 |
| C  | 1.0374597047  | 1.5550713377  | -3.5829264411 |
| C  | -0.1353459727 | 1.4780859461  | -4.3202624928 |
| C  | -1.2793733561 | 0.9931213021  | -3.6987843521 |
| C  | -1.2176036026 | 0.5528239847  | -2.3806310965 |
| C  | -2.4161048506 | -0.0671586170 | -1.7378299898 |
| C  | 2.9436536823  | 1.7024333193  | 1.4097964411  |
| C  | -2.8705045460 | 1.7725047011  | 0.5716438220  |
| C  | -3.5309650009 | -1.3006260033 | 0.7201650591  |
| H  | 1.9516357151  | 1.9570218105  | -4.0218802780 |
| H  | -0.1617259167 | 1.8036849435  | -5.3621214971 |
| H  | -2.2268791233 | 0.9289349129  | -4.2352372243 |
| H  | -3.3476030371 | 0.3214998450  | -2.1706916200 |
| H  | -2.3835696536 | -1.1472093028 | -1.9556776326 |
| H  | 0.0535324077  | -5.0334552831 | 1.2030972024  |
| C  | 0.0227836600  | -4.2900612307 | 0.4025984110  |
| C  | -0.0688332534 | -4.6956330930 | -0.9271307310 |
| H  | -0.1125440917 | -5.7559271299 | -1.1838145624 |
| C  | -0.0926382815 | -3.7243473946 | -1.9231320172 |
| H  | -0.1465287833 | -4.0163856459 | -2.9750018064 |
| C  | -0.0393635234 | -2.3673298460 | -1.5963642657 |
| H  | -0.0302265186 | -1.6506292793 | -2.4168610786 |
| C  | 0.0285095692  | -1.9468614674 | -0.2593091289 |
| C  | 0.0713208352  | -2.9366022287 | 0.7372079341  |
| H  | 0.1407154673  | -2.6494414852 | 1.7851860021  |
| H  | 3.1817145844  | 1.3104454424  | -2.0072289257 |
| H  | 2.2129301113  | 2.4623199736  | -1.1010229890 |
| Cl | -0.0057225111 | -0.2757937559 | 2.6287963463  |
| C  | -1.6810976017 | 2.6780063860  | 0.2278678279  |

|   |               |               |               |
|---|---------------|---------------|---------------|
| H | -1.8943714485 | 3.7020489991  | 0.5730184988  |
| H | -0.7579757359 | 2.3635340492  | 0.7455147388  |
| H | -1.4808838307 | 2.7276907495  | -0.8514573916 |
| C | -4.0937537782 | 2.2760845552  | -0.1920087352 |
| H | -3.9239615742 | 2.2956495089  | -1.2786434315 |
| H | -4.9966722584 | 1.6885930983  | 0.0074355431  |
| H | -4.3014404357 | 3.3125281912  | 0.1187401457  |
| C | -3.0965057512 | 1.8300787716  | 2.0846443753  |
| H | -3.9990070972 | 1.2873353452  | 2.3936135431  |
| H | -2.2378885646 | 1.4212776801  | 2.6388827633  |
| H | -3.2284063409 | 2.8811494294  | 2.3860649773  |
| C | -4.9865601704 | -0.8377382196 | 0.6342406173  |
| H | -5.2758959950 | -0.5494619373 | -0.3875446477 |
| H | -5.6333093689 | -1.6790254758 | 0.9285190310  |
| H | -5.2101590541 | -0.0052717205 | 1.3132253401  |
| C | -3.1614076512 | -1.6438777252 | 2.1660756392  |
| H | -3.8553342142 | -2.4180707289 | 2.5288113868  |
| H | -2.1386207927 | -2.0330136734 | 2.2396742401  |
| H | -3.2353374135 | -0.7835208982 | 2.8422314850  |
| C | -3.3798342149 | -2.5596270642 | -0.1416639446 |
| H | -3.7916160162 | -2.4260861420 | -1.1526413661 |
| H | -2.3424825650 | -2.9064369805 | -0.2194856229 |
| H | -3.9613814742 | -3.3643638919 | 0.3336742694  |
| C | 1.7684678031  | 2.6437493660  | 1.6967960569  |
| H | 1.3968449671  | 3.1474353491  | 0.7900851391  |
| H | 0.9398236176  | 2.1153876041  | 2.1880020258  |
| H | 2.1088983908  | 3.4359392963  | 2.3816264775  |
| C | 4.1125534025  | 2.5460838550  | 0.8905705823  |
| H | 3.8676295412  | 3.1003284314  | -0.0273269013 |
| H | 4.3561727904  | 3.2979857863  | 1.6574830657  |
| H | 5.0208701795  | 1.9634052389  | 0.7079993065  |
| C | 3.3378799646  | 0.9951335452  | 2.7087722766  |
| H | 2.5260020145  | 0.3548363240  | 3.0815797238  |
| H | 4.2492354804  | 0.3932138154  | 2.5957699260  |
| H | 3.5457281537  | 1.7569627253  | 3.4765233967  |
| C | 5.0239465282  | -0.4224185881 | -0.1727717515 |
| H | 5.6830355427  | -1.2529929024 | -0.4705206392 |
| H | 5.1697726808  | 0.3852061416  | -0.9057386669 |
| H | 5.3673923595  | -0.0737367794 | 0.8091218171  |
| C | 3.5869631412  | -0.9421542401 | -0.1443974811 |
| C | 3.4317606639  | -1.9989014106 | 0.9526986408  |
| H | 4.1698882741  | -2.7978824265 | 0.7799593256  |
| H | 3.6082464234  | -1.5942280574 | 1.9571190816  |
| H | 2.4349239781  | -2.4551703014 | 0.9362750209  |
| C | 3.2762393749  | -1.5698285243 | -1.5061444232 |
| H | 3.4409271900  | -0.8710872096 | -2.3396578174 |
| H | 3.9588247003  | -2.4200813457 | -1.6593911525 |
| H | 2.2536591242  | -1.9580792621 | -1.5639049186 |

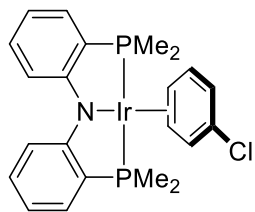

**(L3)Ir-SC-1**

52

**(L3)Ir-SC-1**

|    |          |          |          |
|----|----------|----------|----------|
| Ir | -0.17498 | -0.54454 | 0.32688  |
| P  | -0.92237 | 1.62121  | -0.01401 |
| P  | 1.09623  | -2.37079 | 0.83300  |
| N  | 1.62525  | 0.41062  | 0.56945  |
| C  | -1.23968 | 2.25366  | -1.70317 |
| H  | -1.29764 | 3.35214  | -1.70278 |
| H  | -0.41778 | 1.93135  | -2.35614 |
| H  | -2.18108 | 1.82979  | -2.07734 |
| C  | -2.28533 | 2.35387  | 0.96080  |
| H  | -2.14417 | 2.09119  | 2.01756  |
| H  | -2.30053 | 3.44722  | 0.85091  |
| H  | -3.24132 | 1.94021  | 0.62002  |
| C  | 0.99149  | -3.90041 | -0.16638 |
| H  | 1.15654  | -3.64928 | -1.22273 |
| H  | 1.73580  | -4.64428 | 0.15230  |
| H  | -0.01155 | -4.33860 | -0.05511 |
| C  | 1.03671  | -3.00687 | 2.54875  |
| H  | 1.82351  | -3.75662 | 2.71881  |
| H  | 0.05303  | -3.45690 | 2.74719  |
| H  | 1.17932  | -2.16178 | 3.23494  |
| Cl | -4.79498 | 0.46717  | -2.19172 |
| C  | -3.69820 | -0.34155 | -1.11138 |
| C  | -3.99746 | -0.35956 | 0.28702  |
| H  | -4.89833 | 0.12330  | 0.66912  |
| C  | -3.15189 | -1.00395 | 1.14026  |
| H  | -3.38160 | -1.04747 | 2.20591  |
| C  | -1.96272 | -1.68855 | 0.69856  |
| H  | -1.69738 | -2.55737 | 1.30918  |
| C  | -1.67561 | -1.66415 | -0.72025 |
| H  | -1.14683 | -2.50611 | -1.17803 |
| C  | -2.58817 | -0.96999 | -1.59721 |
| H  | -2.39873 | -0.99546 | -2.67347 |
| C  | 0.52755  | 2.55911  | 0.55712  |
| C  | 1.66149  | 1.77176  | 0.86222  |
| C  | 2.80238  | -0.31731 | 0.41084  |
| C  | 2.76328  | -1.72395 | 0.57973  |
| C  | 2.73275  | 2.41764  | 1.51694  |
| C  | 2.70528  | 3.78518  | 1.75893  |
| C  | 1.61506  | 4.56743  | 1.37298  |
| C  | 0.52228  | 3.93468  | 0.78859  |
| H  | 3.58673  | 1.83375  | 1.85991  |
| H  | 3.55238  | 4.24731  | 2.27283  |

|   |          |          |          |
|---|----------|----------|----------|
| H | 1.60381  | 5.64330  | 1.55721  |
| H | -0.36170 | 4.52298  | 0.52562  |
| C | 3.90926  | -2.50814 | 0.45277  |
| C | 5.13010  | -1.93307 | 0.11403  |
| C | 5.16955  | -0.55809 | -0.12803 |
| C | 4.03833  | 0.23643  | 0.01123  |
| H | 3.84222  | -3.58974 | 0.60168  |
| H | 6.02648  | -2.54679 | 0.00801  |
| H | 6.10441  | -0.09015 | -0.44796 |
| H | 4.10359  | 1.29947  | -0.21935 |

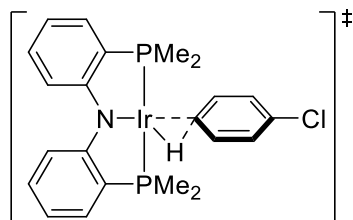

**(L3)Ir-H-TS**

52

**(L3)Ir-H-TS**

|    |          |          |          |
|----|----------|----------|----------|
| Ir | 0.06844  | -0.36483 | -0.43318 |
| P  | -1.27898 | -2.19064 | -0.61119 |
| P  | 0.91108  | 1.74865  | -0.16771 |
| N  | -1.67840 | 0.54239  | 0.12046  |
| C  | -1.85917 | -2.71921 | -2.26854 |
| H  | -2.67035 | -3.45780 | -2.18189 |
| H  | -2.22585 | -1.83530 | -2.80661 |
| H  | -1.02484 | -3.15797 | -2.83516 |
| C  | -0.83082 | -3.79435 | 0.15990  |
| H  | -0.61697 | -3.63084 | 1.22505  |
| H  | -1.63973 | -4.53373 | 0.06601  |
| H  | 0.06919  | -4.19495 | -0.33038 |
| C  | 1.84640  | 2.58533  | -1.50399 |
| H  | 1.31999  | 2.43661  | -2.45608 |
| H  | 1.93646  | 3.66257  | -1.30238 |
| H  | 2.85332  | 2.15322  | -1.57302 |
| C  | 1.91549  | 2.14924  | 1.31145  |
| H  | 2.07319  | 3.23446  | 1.40101  |
| H  | 2.88804  | 1.64121  | 1.24153  |
| H  | 1.38733  | 1.78158  | 2.20085  |
| C  | -4.79584 | -1.96462 | 1.52047  |
| C  | -3.77477 | -2.45407 | 0.71384  |
| C  | -2.74089 | -1.62205 | 0.28242  |
| C  | -2.71351 | -0.24070 | 0.60687  |
| C  | -3.72614 | 0.21859  | 1.48262  |
| C  | -4.73787 | -0.62530 | 1.91816  |
| H  | -5.60031 | -2.61762 | 1.86377  |
| H  | -3.76863 | -3.51063 | 0.42974  |
| H  | -3.69754 | 1.24464  | 1.84792  |
| H  | -5.49402 | -0.22901 | 2.60134  |
| C  | -3.02191 | 2.61544  | -0.07636 |

|    |          |          |          |
|----|----------|----------|----------|
| C  | -1.79372 | 1.92085  | 0.03425  |
| C  | -0.61528 | 2.70693  | -0.02458 |
| C  | -0.67262 | 4.10105  | -0.06731 |
| C  | -1.89225 | 4.76682  | -0.10240 |
| C  | -3.06167 | 4.00100  | -0.13623 |
| H  | -3.95375 | 2.05484  | -0.14422 |
| H  | 0.25770  | 4.67672  | -0.09157 |
| H  | -1.93408 | 5.85694  | -0.13969 |
| H  | -4.03248 | 4.49572  | -0.22716 |
| C  | 4.38189  | -0.66866 | 0.67059  |
| C  | 3.34622  | -1.39629 | 1.24141  |
| H  | 3.41110  | -1.71417 | 2.28266  |
| C  | 2.23613  | -1.72759 | 0.45121  |
| C  | 2.16030  | -1.26042 | -0.86842 |
| C  | 3.22335  | -0.53895 | -1.42533 |
| H  | 3.14840  | -0.18151 | -2.45454 |
| C  | 4.35175  | -0.25578 | -0.66899 |
| H  | 5.19679  | 0.29327  | -1.08652 |
| H  | 1.28489  | -1.52488 | -1.52881 |
| H  | 1.47070  | -2.39058 | 0.85392  |
| Cl | 5.76519  | -0.25952 | 1.63725  |

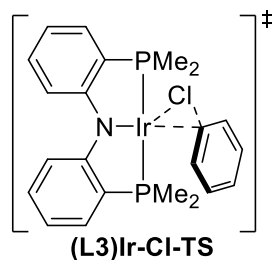

52

**(L3)Ir-Cl-TS**

|    |          |          |          |
|----|----------|----------|----------|
| Ir | -0.41598 | -0.33295 | -0.57159 |
| P  | 0.72760  | -2.27898 | -0.27047 |
| P  | -0.65328 | 1.81902  | -1.30954 |
| N  | 1.24876  | 0.49613  | 0.25511  |
| C  | 0.41357  | -3.62272 | 0.94604  |
| H  | 1.27881  | -4.29968 | 1.00510  |
| H  | 0.23301  | -3.17880 | 1.93388  |
| H  | -0.46748 | -4.20738 | 0.64366  |
| C  | 0.98222  | -3.25256 | -1.80383 |
| H  | 1.33645  | -2.57489 | -2.59103 |
| H  | 1.71468  | -4.05972 | -1.65268 |
| H  | 0.02255  | -3.68884 | -2.11788 |
| C  | -2.17014 | 2.81906  | -1.55754 |
| H  | -2.66867 | 2.98792  | -0.59415 |
| H  | -1.93023 | 3.79242  | -2.01028 |
| H  | -2.85366 | 2.27928  | -2.22896 |
| C  | 0.24294  | 2.12962  | -2.87979 |
| H  | 0.35267  | 3.20880  | -3.06626 |
| H  | -0.29995 | 1.65987  | -3.71262 |
| H  | 1.23361  | 1.66342  | -2.80064 |

|    |          |          |          |
|----|----------|----------|----------|
| C  | 1.17706  | 1.82462  | 0.66226  |
| C  | 1.87015  | 2.35951  | 1.76600  |
| C  | 1.72250  | 3.69687  | 2.11791  |
| C  | 0.88500  | 4.54961  | 1.39647  |
| C  | 0.16545  | 4.02895  | 0.32231  |
| C  | 0.29573  | 2.68866  | -0.03343 |
| H  | 2.50093  | 1.70827  | 2.37153  |
| H  | 2.26202  | 4.07596  | 2.98993  |
| H  | 0.77518  | 5.59731  | 1.68319  |
| H  | -0.51776 | 4.67491  | -0.23601 |
| C  | 3.50358  | -2.43414 | 0.28010  |
| C  | 4.74847  | -1.86722 | 0.52402  |
| C  | 4.82905  | -0.47500 | 0.63694  |
| C  | 3.70101  | 0.32691  | 0.55168  |
| C  | 2.41543  | -0.23520 | 0.35528  |
| C  | 2.35818  | -1.64191 | 0.17808  |
| H  | 3.42114  | -3.51749 | 0.14751  |
| H  | 5.64273  | -2.48878 | 0.59735  |
| H  | 5.80219  | 0.00210  | 0.78202  |
| H  | 3.81469  | 1.40896  | 0.61090  |
| H  | -2.73433 | -2.48314 | 3.40961  |
| C  | -2.85738 | -1.67846 | 2.68064  |
| C  | -2.54607 | -1.92248 | 1.34791  |
| H  | -2.20149 | -2.90088 | 1.01884  |
| C  | -2.66332 | -0.87482 | 0.42466  |
| Cl | -2.52696 | -1.26436 | -1.32660 |
| C  | -3.23601 | 0.34962  | 0.79491  |
| H  | -3.42442 | 1.10997  | 0.04021  |
| C  | -3.53697 | 0.56978  | 2.13483  |
| H  | -3.94632 | 1.53760  | 2.43387  |
| C  | -3.33364 | -0.43028 | 3.08675  |
| H  | -3.57417 | -0.24806 | 4.13579  |

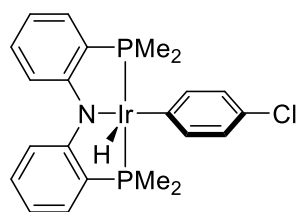

**(L3)Ir(H)(Ar)**

52

**(L3)Ir(H)(Ar)**

|    |               |               |               |
|----|---------------|---------------|---------------|
| Ir | 0.1145333101  | 0.0662317379  | -0.2674152466 |
| P  | -0.0687904062 | -2.1794118568 | -0.6430000610 |
| P  | -0.2711618216 | 2.2998596805  | 0.0270356165  |
| N  | -1.9313891511 | -0.0903565178 | 0.1700282087  |
| C  | -0.0654568271 | -2.7901706322 | -2.3631928378 |
| H  | -0.3501546887 | -3.8518553344 | -2.4013489770 |
| H  | -0.7804316043 | -2.1982247450 | -2.9493848445 |
| H  | 0.9403196914  | -2.6640581756 | -2.7889365469 |
| C  | 1.0776565123  | -3.3091103716 | 0.2169718424  |

|    |               |               |               |
|----|---------------|---------------|---------------|
| H  | 1.0311041602  | -3.1097771218 | 1.2958424890  |
| H  | 0.8377103456  | -4.3653014258 | 0.0274366879  |
| H  | 2.0972247043  | -3.0900780583 | -0.1324834968 |
| C  | 0.2380303693  | 3.4449711707  | -1.2967728344 |
| H  | -0.1753162758 | 3.0889381500  | -2.2493925530 |
| H  | -0.1082136344 | 4.4707497681  | -1.1051785300 |
| H  | 1.3357243329  | 3.4324365606  | -1.3573532252 |
| C  | 0.3081083950  | 3.1292047287  | 1.5500380194  |
| H  | -0.0823795035 | 4.1557266319  | 1.6132023969  |
| H  | 1.4073889298  | 3.1500892009  | 1.5519300853  |
| H  | -0.0392429530 | 2.5585241805  | 2.4218520589  |
| C  | 4.9379767204  | 0.0957153837  | 0.4078100947  |
| C  | 4.0422415767  | 0.2718380966  | 1.4592257328  |
| H  | 4.4150675649  | 0.3945032061  | 2.4781995221  |
| C  | 2.6751877542  | 0.2897317174  | 1.1878512450  |
| C  | 2.1475137573  | 0.1295098307  | -0.1107570901 |
| C  | 3.0985087677  | -0.0434086980 | -1.1364326087 |
| H  | 2.7607504962  | -0.1730814070 | -2.1687795204 |
| C  | 4.4723725790  | -0.0624842779 | -0.8936837699 |
| H  | 5.1834375944  | -0.1992697552 | -1.7111665428 |
| H  | 0.5197715804  | 0.2913335070  | -1.7325850628 |
| H  | 1.9898236544  | 0.4293525474  | 2.0329467830  |
| Cl | 6.6534724730  | 0.0769919274  | 0.7256715146  |
| C  | -3.4001971088 | -3.9941743452 | 0.9577893869  |
| C  | -2.2056477592 | -3.7903067418 | 0.2746741704  |
| C  | -1.7188449995 | -2.5033093258 | 0.0429568967  |
| C  | -2.4480385701 | -1.3513284378 | 0.4536599468  |
| C  | -3.6192962922 | -1.5877003079 | 1.2079516358  |
| C  | -4.0807411989 | -2.8766716494 | 1.4445738684  |
| H  | -3.7743484549 | -5.0030098076 | 1.1408395915  |
| H  | -1.6251892601 | -4.6525276308 | -0.0673860253 |
| H  | -4.1584185426 | -0.7457644855 | 1.6407524758  |
| H  | -4.9903522028 | -3.0096073642 | 2.0363311745  |
| C  | -4.1231868491 | 1.0552638340  | -0.0858312473 |
| C  | -2.7202926495 | 1.0525082455  | 0.0859286321  |
| C  | -2.0849215827 | 2.3271868144  | 0.0754501379  |
| C  | -2.8240554938 | 3.5087581402  | 0.0101402620  |
| C  | -4.2109779404 | 3.4838529526  | -0.0932645038 |
| C  | -4.8422163867 | 2.2413434516  | -0.1691179953 |
| H  | -4.6553561616 | 0.1108456346  | -0.1893212095 |
| H  | -2.2999675804 | 4.4693614445  | 0.0189551837  |
| H  | -4.7849790414 | 4.4105831420  | -0.1482152146 |
| H  | -5.9253992376 | 2.1898655495  | -0.3087431584 |

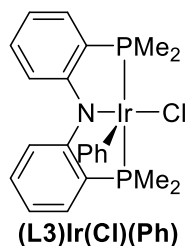

52

**(L3)Ir(Cl)(Ph)**

|    |          |          |          |
|----|----------|----------|----------|
| Ir | 0.18288  | -0.62487 | -0.70465 |
| P  | -2.10884 | -0.83115 | -0.75762 |
| P  | 2.37687  | 0.03936  | -0.50482 |
| N  | -0.24181 | 1.31081  | -0.16201 |
| C  | -2.57299 | 0.69811  | 0.08588  |
| C  | -1.50392 | 1.60137  | 0.33809  |
| C  | 0.77288  | 2.25131  | -0.25217 |
| C  | 2.12859  | 1.82160  | -0.31893 |
| C  | -2.91899 | -0.84244 | -2.39273 |
| H  | -4.01331 | -0.79609 | -2.29243 |
| H  | -2.57188 | 0.02421  | -2.97128 |
| H  | -2.62875 | -1.76275 | -2.91980 |
| C  | -2.88993 | -2.20765 | 0.13867  |
| H  | -2.52649 | -2.20521 | 1.17455  |
| H  | -3.98592 | -2.12531 | 0.12310  |
| H  | -2.58265 | -3.14680 | -0.34302 |
| C  | 3.43796  | -0.18998 | -1.96958 |
| H  | 2.95070  | 0.26932  | -2.83980 |
| H  | 4.43120  | 0.25900  | -1.82574 |
| H  | 3.53482  | -1.26955 | -2.15305 |
| C  | 3.40016  | -0.55896 | 0.87733  |
| H  | 4.35533  | -0.01555 | 0.91277  |
| H  | 3.58741  | -1.63289 | 0.73608  |
| H  | 2.85207  | -0.41834 | 1.81768  |
| H  | 0.35269  | -4.14095 | 2.97091  |
| C  | 0.29740  | -3.06345 | 2.79264  |
| C  | 0.26568  | -2.17633 | 3.86774  |
| H  | 0.29169  | -2.54721 | 4.89501  |
| C  | 0.20344  | -0.80948 | 3.60964  |
| H  | 0.17954  | -0.09458 | 4.43667  |
| C  | 0.17063  | -0.33019 | 2.29846  |
| H  | 0.12970  | 0.74558  | 2.13458  |
| C  | 0.19607  | -1.21598 | 1.20998  |
| C  | 0.26434  | -2.59434 | 1.47961  |
| H  | 0.29865  | -3.30276 | 0.65106  |
| Cl | 0.63574  | -2.62117 | -1.89881 |
| C  | 1.60471  | 4.54264  | -0.43330 |
| H  | 1.38188  | 5.60898  | -0.52500 |
| C  | 2.93390  | 4.11009  | -0.40488 |
| H  | 3.75763  | 4.82472  | -0.44872 |
| C  | 3.17816  | 2.74322  | -0.37075 |
| H  | 4.20874  | 2.37721  | -0.40779 |
| C  | -3.08270 | 2.92461  | 1.65291  |
| C  | -4.13944 | 2.07105  | 1.32823  |
| H  | -5.14836 | 2.26070  | 1.69863  |
| C  | -3.86246 | 0.94715  | 0.55897  |
| H  | -4.66131 | 0.23355  | 0.33665  |
| H  | -3.25835 | 3.78246  | 2.30737  |
| C  | -1.79722 | 2.69954  | 1.17946  |
| H  | -0.99652 | 3.36767  | 1.49430  |

|   |          |         |          |
|---|----------|---------|----------|
| C | 0.54994  | 3.64455 | -0.36754 |
| H | -0.47020 | 4.02014 | -0.43666 |

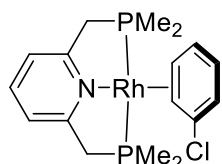

**Rh-SC-1**

46

**Rh-SC-1**

|    |               |               |               |
|----|---------------|---------------|---------------|
| Rh | -0.0018574783 | 0.2997037345  | 0.2837914084  |
| P  | -0.7014496717 | -1.9066835060 | 0.2229041213  |
| P  | 1.2825079981  | 2.1758115899  | 0.1615992433  |
| N  | 1.8571694760  | -0.6154709942 | -0.0782568808 |
| C  | 0.8856740553  | -2.6692834179 | 0.7862468653  |
| C  | 2.0420387205  | -1.9283150604 | 0.2004224832  |
| C  | 3.2628534554  | -2.5554957542 | -0.0389174847 |
| C  | 4.3218620658  | -1.8187796661 | -0.5537170998 |
| C  | 4.1279203078  | -0.4708028376 | -0.8320730200 |
| C  | 2.8824894056  | 0.1053594009  | -0.5987346304 |
| C  | 2.6119071021  | 1.5370271816  | -0.9406276716 |
| C  | -1.9123632275 | -2.8574957018 | 1.2029336137  |
| H  | -1.6741963472 | -3.9294986189 | 1.1310958563  |
| H  | -1.8835267624 | -2.5406299540 | 2.2534241306  |
| H  | -2.9239293445 | -2.6966967836 | 0.8128166277  |
| C  | -0.9226777823 | -2.5615119396 | -1.4665104528 |
| H  | -0.0950540077 | -2.2141897276 | -2.1004908560 |
| H  | -0.9587851133 | -3.6610096277 | -1.4722448108 |
| H  | -1.8570463534 | -2.1604342071 | -1.8849316340 |
| C  | 2.1493251881  | 2.6965544415  | 1.6808559242  |
| H  | 2.6181228273  | 1.8197193041  | 2.1486915275  |
| H  | 2.9170085053  | 3.4543299162  | 1.4639808344  |
| H  | 1.4221505812  | 3.1149528908  | 2.3912920396  |
| C  | 0.7594795762  | 3.7437620607  | -0.6082526235 |
| H  | 1.6015652514  | 4.4472449285  | -0.6854142865 |
| H  | -0.0290852830 | 4.2081155618  | 0.0018211087  |
| H  | 0.3567009895  | 3.5515908018  | -1.6125287460 |
| H  | 0.8991841919  | -2.5580896760 | 1.8845888187  |
| H  | 0.9435909641  | -3.7456774409 | 0.5645586595  |
| H  | 3.3750369225  | -3.6154715842 | 0.1930443683  |
| H  | 5.2892571023  | -2.2903908421 | -0.7388989408 |
| H  | 4.9321462350  | 0.1394078741  | -1.2454077092 |
| H  | 3.5308130497  | 2.1418939978  | -0.9191555970 |
| H  | 2.2024965819  | 1.5902720507  | -1.9645355927 |
| H  | -4.2253365521 | -0.6847397446 | 2.1493949008  |
| C  | -3.5465661949 | -0.1267364229 | 1.5006058616  |
| C  | -3.7280402921 | -0.1934115697 | 0.0990822381  |
| H  | -4.5344298524 | -0.7902330570 | -0.3310232052 |
| C  | -2.8878911888 | 0.5169583421  | -0.7257386206 |
| Cl | -3.1006483228 | 0.4683434292  | -2.4418620218 |

|   |               |              |               |
|---|---------------|--------------|---------------|
| C | -1.8579438685 | 1.3573478455 | -0.2045006555 |
| H | -1.4979538694 | 2.1527085907 | -0.8591280552 |
| C | -1.6924103280 | 1.4123853557 | 1.2060274972  |
| H | -1.1717396581 | 2.2552571308 | 1.6667315964  |
| C | -2.5415852017 | 0.6368024365 | 2.0467120778  |
| H | -2.4322912612 | 0.7132629401 | 3.1304301442  |

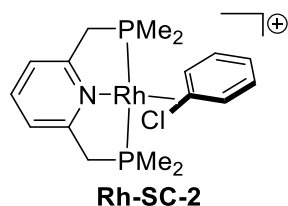

46

**Rh-SC-2**

|    |               |               |               |
|----|---------------|---------------|---------------|
| Rh | 0.3021720417  | 0.3888920612  | -0.0969682613 |
| P  | 1.7075105555  | 2.1763424881  | 0.0388439796  |
| P  | -0.6132547579 | -1.7095710537 | -0.1633414954 |
| N  | 2.0357737730  | -0.6605315022 | 0.1030834514  |
| C  | 3.0172554278  | 1.3608262642  | 1.0507859680  |
| C  | 3.1461475984  | -0.0643399790 | 0.6126860148  |
| C  | 4.3469275173  | -0.7572138636 | 0.7378224980  |
| C  | 4.4133087743  | -2.0938701151 | 0.3637655530  |
| C  | 3.2717898721  | -2.7010077766 | -0.1446035127 |
| C  | 2.0993729625  | -1.9626150427 | -0.2808251384 |
| C  | 0.8633896014  | -2.5603802638 | -0.8750757307 |
| C  | 2.5752066044  | 2.7391083183  | -1.4647393050 |
| H  | 3.3940726442  | 3.4321059392  | -1.2197688281 |
| H  | 2.9773894550  | 1.8658894673  | -1.9969881679 |
| H  | 1.8595920446  | 3.2436791501  | -2.1289646281 |
| C  | 1.3159922184  | 3.7151106580  | 0.9328058081  |
| H  | 0.8622197122  | 3.4695462831  | 1.9025878584  |
| H  | 2.2151202418  | 4.3295440504  | 1.0894054139  |
| H  | 0.5877958633  | 4.2954292734  | 0.3480653584  |
| C  | -1.9956901063 | -2.2468764106 | -1.2227854355 |
| H  | -1.8919458301 | -1.8024261472 | -2.2218776526 |
| H  | -2.0199409540 | -3.3437013806 | -1.3066209396 |
| H  | -2.9421970409 | -1.9022291497 | -0.7835777996 |
| C  | -0.9011948603 | -2.6023232074 | 1.4046106189  |
| H  | -1.0436459455 | -3.6788682629 | 1.2263293544  |
| H  | -1.7978883920 | -2.1986207146 | 1.8936785344  |
| H  | -0.0415066649 | -2.4504593560 | 2.0719287075  |
| H  | 3.9864805252  | 1.8813983014  | 1.0270771691  |
| H  | 2.6489779417  | 1.3879659688  | 2.0909308736  |
| H  | 5.2191918214  | -0.2429258087 | 1.1436484534  |
| H  | 5.3441865519  | -2.6552453279 | 0.4661529929  |
| H  | 3.2818191509  | -3.7465051047 | -0.4559046380 |
| H  | 0.8410573208  | -2.3441319095 | -1.9572322062 |
| H  | 0.8444090827  | -3.6539970362 | -0.7536832927 |
| H  | -6.0413855980 | -0.1160620330 | -1.3081576860 |
| C  | -5.2409029420 | -0.0039976512 | -0.5737753934 |

|    |               |               |               |
|----|---------------|---------------|---------------|
| C  | -5.3630009516 | -0.5794963338 | 0.6903909686  |
| H  | -6.2624290368 | -1.1422817435 | 0.9480575587  |
| C  | -4.3430608050 | -0.4277215239 | 1.6312003258  |
| C  | -3.1923071005 | 0.2912064754  | 1.3121557278  |
| H  | -2.3814386101 | 0.4249824451  | 2.0303665308  |
| C  | -3.0932560273 | 0.8418713467  | 0.0394381411  |
| Cl | -1.6338625884 | 1.7262158188  | -0.3877140243 |
| C  | -4.0960711863 | 0.7178620292  | -0.9136079892 |
| H  | -3.9822809500 | 1.1677843394  | -1.9011802414 |
| H  | -4.4460509363 | -0.8644028452 | 2.6272048773  |

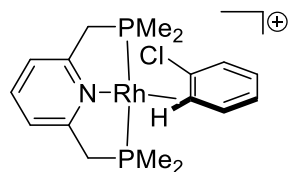

**Rh-SC-3**

46

**Rh-SC-3**

|    |               |               |               |
|----|---------------|---------------|---------------|
| Rh | 0.0928965078  | 0.2729141443  | 0.1163773358  |
| P  | -0.3690909839 | -1.9667018182 | -0.0990410561 |
| P  | 1.1344685244  | 2.2893699094  | 0.3251795188  |
| N  | 2.0184450970  | -0.3916884664 | -0.1382583159 |
| C  | 1.0638008140  | -2.3641462854 | -1.1977364312 |
| C  | 2.2551591443  | -1.5871790944 | -0.7363667516 |
| C  | 3.5527449273  | -2.0574849552 | -0.9224370575 |
| C  | 4.6303688645  | -1.2810052782 | -0.5152836421 |
| C  | 4.3807656366  | -0.0516997941 | 0.0832339489  |
| C  | 3.0671145274  | 0.3672444801  | 0.2730502806  |
| C  | 2.7484158867  | 1.6583731216  | 0.9587100952  |
| C  | -0.1174971676 | -3.0579762736 | 1.3403103816  |
| H  | -0.1019106289 | -4.1151360395 | 1.0357904989  |
| H  | 0.8334558663  | -2.8008382972 | 1.8272310892  |
| H  | -0.9306088652 | -2.8949612890 | 2.0597102737  |
| C  | -1.7970041037 | -2.6835954380 | -0.9738742052 |
| H  | -2.0082390723 | -2.0962152154 | -1.8778848832 |
| H  | -1.5981927136 | -3.7302750599 | -1.2478568844 |
| H  | -2.6778928247 | -2.6487921233 | -0.3191251355 |
| C  | 0.6377532450  | 3.5763562988  | 1.5155607892  |
| H  | 0.4571115299  | 3.1184058486  | 2.4977329973  |
| H  | 1.4089333075  | 4.3554229947  | 1.6080400314  |
| H  | -0.2976418932 | 4.0420196945  | 1.1729440271  |
| C  | 1.5791271262  | 3.2252209613  | -1.1794233116 |
| H  | 2.3004736160  | 4.0242074810  | -0.9507589383 |
| H  | 0.6761700818  | 3.6759542598  | -1.6151055250 |
| H  | 2.0128408263  | 2.5383716171  | -1.9194223625 |
| H  | 1.2825634438  | -3.4407908798 | -1.2618382059 |
| H  | 0.7748801683  | -2.0225595254 | -2.2067434049 |
| H  | 3.7058011086  | -3.0262200736 | -1.4000313872 |
| H  | 5.6545324702  | -1.6298256131 | -0.6626544319 |
| H  | 5.1991314216  | 0.5855870533  | 0.4211470213  |

|    |               |               |               |
|----|---------------|---------------|---------------|
| H  | 2.5938719789  | 1.4674989706  | 2.0348679071  |
| H  | 3.5714536197  | 2.3827019550  | 0.8648964465  |
| H  | -1.3142332857 | 1.1341139932  | 0.8421752946  |
| C  | -2.0935574440 | 0.8473437344  | 0.0456585124  |
| C  | -2.2595157392 | 1.5868073142  | -1.1332717634 |
| H  | -1.4691678702 | 2.2687972872  | -1.4515106815 |
| C  | -3.4145289793 | 1.4472836084  | -1.8986263728 |
| C  | -4.4411179480 | 0.6144994764  | -1.4548290131 |
| H  | -5.3584300524 | 0.5170227723  | -2.0397040673 |
| C  | -4.3239032604 | -0.0792471848 | -0.2501366272 |
| H  | -5.1365445470 | -0.7072036029 | 0.1184096481  |
| C  | -3.1532473674 | 0.0432478424  | 0.4895513250  |
| Cl | -2.9995926183 | -0.8173650477 | 1.9853862047  |
| H  | -3.5245799324 | 2.0062001917  | -2.8297420498 |

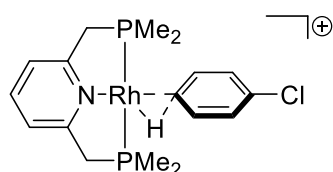

**Rh-H-TS**

46

**Rh-H-TS**

|    |               |               |               |
|----|---------------|---------------|---------------|
| Rh | 0.3259462168  | -0.0677487114 | -0.3187799268 |
| P  | 0.2321966852  | 2.2167649535  | -0.3532626834 |
| P  | 1.0392826864  | -2.2482932213 | -0.3127781146 |
| N  | 2.3480139782  | 0.2831544809  | 0.2621517679  |
| C  | 2.0384028885  | 2.5921613534  | -0.4853505931 |
| C  | 2.8733476591  | 1.5274825490  | 0.1626752339  |
| C  | 4.1691334355  | 1.7931573980  | 0.5995008128  |
| C  | 4.9423830801  | 0.7565731913  | 1.1099206704  |
| C  | 4.4017065999  | -0.5222385426 | 1.1823965879  |
| C  | 3.0901470602  | -0.7327126158 | 0.7633662075  |
| C  | 2.4429809658  | -2.0825513418 | 0.8824580534  |
| C  | -0.5284457246 | 3.2481784150  | -1.6445118349 |
| H  | -0.1923058790 | 4.2916249927  | -1.5526033246 |
| H  | -0.2637652807 | 2.8609254548  | -2.6376679135 |
| H  | -1.6204150055 | 3.2191924206  | -1.5302042289 |
| C  | -0.3063920885 | 2.9820463354  | 1.2106666976  |
| H  | 0.2414333668  | 2.5314085115  | 2.0501385636  |
| H  | -0.1440648503 | 4.0700535669  | 1.2075676418  |
| H  | -1.3767274374 | 2.7702033737  | 1.3476207740  |
| C  | 1.8220316058  | -2.7902209271 | -1.8674242661 |
| H  | 2.5048690712  | -2.0070802476 | -2.2245281219 |
| H  | 2.3769296242  | -3.7298295195 | -1.7275926144 |
| H  | 1.0422345151  | -2.9380490183 | -2.6277619712 |
| C  | 0.1212912101  | -3.7132021736 | 0.2579540283  |
| H  | 0.7522387734  | -4.6126811006 | 0.2079131697  |
| H  | -0.7599984005 | -3.8531284244 | -0.3840709040 |
| H  | -0.2239096451 | -3.5701891699 | 1.2906034906  |
| H  | 2.2633424002  | 2.5974056634  | -1.5667839065 |

|    |               |               |               |
|----|---------------|---------------|---------------|
| H  | 2.2941333713  | 3.5917378053  | -0.1018315925 |
| H  | 4.5694292933  | 2.8048605233  | 0.5199462516  |
| H  | 5.9644191359  | 0.9440395175  | 1.4464707995  |
| H  | 4.9842713305  | -1.3566538556 | 1.5754680928  |
| H  | 3.1856347477  | -2.8893393402 | 0.7844921067  |
| H  | 1.9984963953  | -2.1788856874 | 1.8888306431  |
| C  | -4.4386236767 | -0.3740619543 | 0.3308266906  |
| C  | -3.5220224381 | -1.1110720603 | 1.0791059528  |
| H  | -3.8689748942 | -1.7187622975 | 1.9167364897  |
| C  | -2.1712211987 | -1.0716728469 | 0.7419973926  |
| C  | -1.6974762610 | -0.2666086828 | -0.3083729740 |
| C  | -2.6513813104 | 0.4423014955  | -1.0582575692 |
| H  | -2.3406817594 | 1.0404541028  | -1.9177103493 |
| C  | -4.0089384763 | 0.3956420882  | -0.7470107449 |
| H  | -4.7356632179 | 0.9520603682  | -1.3414918414 |
| H  | -0.5547604362 | -0.4227041084 | -1.5189547787 |
| Cl | -6.1203697261 | -0.4305805439 | 0.7344879545  |
| H  | -1.4760630593 | -1.6631402072 | 1.3413152622  |

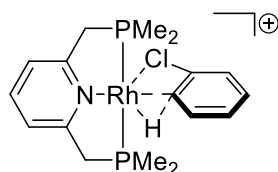

**Rh-H-TS'**

46

**Rh-H-TS'**

|    |               |               |               |
|----|---------------|---------------|---------------|
| Rh | 0.0225154872  | -0.0209935020 | -0.4248325744 |
| P  | 0.1467956036  | -2.2819886254 | -0.1771704375 |
| P  | -0.7291756352 | 2.1258533162  | -0.7402996289 |
| N  | -1.9864476304 | -0.3227253235 | 0.1332599161  |
| C  | -1.6481692067 | -2.6944570686 | -0.3530162021 |
| C  | -2.5044699578 | -1.5743532710 | 0.1596716864  |
| C  | -3.8021542302 | -1.7990859285 | 0.6123762101  |
| C  | -4.5816273118 | -0.7191377114 | 1.0122442909  |
| C  | -4.0448037813 | 0.5621760560  | 0.9642577342  |
| C  | -2.7317701835 | 0.7361623353  | 0.5325281781  |
| C  | -2.0834474593 | 2.0897605120  | 0.5178169044  |
| C  | 0.9983794267  | -3.3979551080 | -1.3322368852 |
| H  | 0.7304196222  | -4.4463952065 | -1.1345193262 |
| H  | 0.7352142222  | -3.1357583172 | -2.3658276860 |
| H  | 2.0827112070  | -3.2768680054 | -1.2025538485 |
| C  | 0.6236191343  | -2.8876052849 | 1.4738617502  |
| H  | 0.0287442813  | -2.3693226535 | 2.2388580658  |
| H  | 0.4817717552  | -3.9745393458 | 1.5666829196  |
| H  | 1.6819825443  | -2.6396400901 | 1.6400865729  |
| C  | -1.5938297877 | 2.4146902637  | -2.3195440493 |
| H  | -2.2707230847 | 1.5736443157  | -2.5237386600 |
| H  | -2.1668215233 | 3.3536301437  | -2.2933803105 |
| H  | -0.8542732751 | 2.4639227860  | -3.1310088158 |
| C  | 0.1822493099  | 3.6685242773  | -0.4352075256 |

|    |               |               |               |
|----|---------------|---------------|---------------|
| H  | -0.4843043311 | 4.5406709055  | -0.5045830138 |
| H  | 0.9752531176  | 3.7620715883  | -1.1907625313 |
| H  | 0.6512164516  | 3.6284011926  | 0.5561517264  |
| H  | -1.8257283111 | -2.8034721540 | -1.4375141506 |
| H  | -1.9181600864 | -3.6530761692 | 0.1154799428  |
| H  | -4.1983000839 | -2.8152468729 | 0.6340713814  |
| H  | -5.6051165281 | -0.8762664759 | 1.3597186980  |
| H  | -4.6305339761 | 1.4287452770  | 1.2739579545  |
| H  | -2.8272350611 | 2.8889362543  | 0.3783680374  |
| H  | -1.5905450946 | 2.2648641511  | 1.4902227939  |
| H  | 5.8883491360  | 0.1244670121  | 0.6179456525  |
| C  | 4.8314980699  | 0.1096618594  | 0.3445252066  |
| C  | 3.8905149515  | 0.6914904699  | 1.1909270986  |
| H  | 4.1899568805  | 1.1466504469  | 2.1368830776  |
| C  | 2.5450682885  | 0.6782848523  | 0.8347970586  |
| Cl | 1.4082401116  | 1.3481815324  | 1.9893460802  |
| C  | 2.0788582977  | 0.0856842227  | -0.3534549691 |
| C  | 3.0595183458  | -0.4970234922 | -1.1777343073 |
| H  | 2.7512670751  | -0.9539609606 | -2.1215250719 |
| C  | 4.4119344780  | -0.4896579526 | -0.8397181185 |
| H  | 5.1394734364  | -0.9477810904 | -1.5131247184 |
| H  | 1.0990700229  | 0.3867904948  | -1.4645282205 |

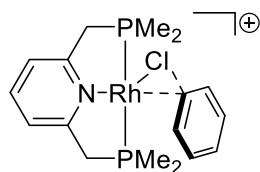

**Rh-Cl-TS**

46

**Rh-Cl-TS**

|    |               |               |               |
|----|---------------|---------------|---------------|
| Rh | -0.1199999619 | -0.0493190752 | -0.5791059514 |
| P  | 0.6457235243  | -2.2253516184 | -0.6223980851 |
| P  | -0.0551598592 | 2.2523504353  | -0.5677034710 |
| N  | 1.6968324335  | 0.1848131840  | 0.3854239658  |
| C  | 1.5103030740  | -2.1603159644 | 1.0091035341  |
| C  | 2.2351855317  | -0.8525149228 | 1.0759946508  |
| C  | 3.4279230112  | -0.7038346498 | 1.7788962617  |
| C  | 4.0812244484  | 0.5227985640  | 1.7683048014  |
| C  | 3.5467357823  | 1.5646350526  | 1.0177161870  |
| C  | 2.3613308268  | 1.3665557361  | 0.3165318350  |
| C  | 1.7840276180  | 2.4121389946  | -0.5846174903 |
| C  | -0.2165960434 | -3.8315975267 | -0.6652617139 |
| H  | 0.5144317685  | -4.6475064939 | -0.7601367307 |
| H  | -0.8045361281 | -3.9924187147 | 0.2472684023  |
| H  | -0.8940407990 | -3.8544856787 | -1.5308432266 |
| C  | 1.9820232599  | -2.4485567434 | -1.8464918539 |
| H  | 2.6546468809  | -1.5803944296 | -1.8230158111 |
| H  | 2.5568954635  | -3.3662655609 | -1.6516097131 |
| H  | 1.5346692544  | -2.5071665719 | -2.8490216089 |
| C  | -0.4943427457 | 3.2242005695  | 0.9149092106  |

|    |               |               |               |
|----|---------------|---------------|---------------|
| H  | -0.0948295316 | 2.7211016002  | 1.8067877183  |
| H  | -0.0740166530 | 4.2385463057  | 0.8444657804  |
| H  | -1.5833485953 | 3.2920788534  | 1.0234094925  |
| C  | -0.6459819309 | 3.2473586624  | -1.9707139219 |
| H  | -0.3108843826 | 4.2920859013  | -1.8934382562 |
| H  | -1.7449186137 | 3.2232706035  | -1.9880093518 |
| H  | -0.2827900744 | 2.8050921961  | -2.9082305994 |
| H  | 0.7092088263  | -2.1892389896 | 1.7690576622  |
| H  | 2.1900066785  | -3.0052417221 | 1.1949998048  |
| H  | 3.8330297848  | -1.5525347358 | 2.3316288687  |
| H  | 5.0106509223  | 0.6605982934  | 2.3247843376  |
| H  | 4.0521112465  | 2.5292879023  | 0.9549111348  |
| H  | 2.1357018650  | 3.4201474134  | -0.3199160775 |
| H  | 2.1076964688  | 2.2059929412  | -1.6197703991 |
| H  | -3.0493700794 | -2.3049423908 | 2.7499274613  |
| C  | -2.9644698089 | -1.3906375749 | 2.1576578956  |
| C  | -2.2977120055 | -1.4363876359 | 0.9333301475  |
| H  | -1.9230113348 | -2.3803991352 | 0.5477889252  |
| C  | -2.1509497357 | -0.2583474213 | 0.1922124675  |
| Cl | -2.0638424762 | -0.4303398683 | -1.8244766612 |
| C  | -2.8310992052 | 0.9045790375  | 0.5803064060  |
| H  | -2.8562106368 | 1.7672122698  | -0.0860918802 |
| C  | -3.4987625792 | 0.9299917399  | 1.7992044565  |
| H  | -4.0086026732 | 1.8455559110  | 2.1090142503  |
| C  | -3.5482755759 | -0.2083215584 | 2.6069191042  |
| H  | -4.0826883696 | -0.1849884177 | 3.5582525450  |

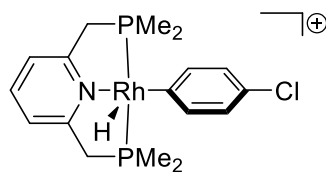

**Rh(H)(Ar)**

46

**Rh(H)(Ar)**

|    |               |               |               |
|----|---------------|---------------|---------------|
| Rh | 0.3102746550  | -0.0058545867 | -0.0663548851 |
| P  | 0.5160167137  | 2.2596578553  | -0.0447230941 |
| P  | 0.6670476203  | -2.2667252674 | -0.2417440261 |
| N  | 2.4504992026  | 0.0400441747  | 0.1417452879  |
| C  | 2.3187914195  | 2.4179230899  | -0.4379126087 |
| C  | 3.1110799558  | 1.2062289568  | -0.0230634926 |
| C  | 4.4964286075  | 1.2647326034  | 0.1189432625  |
| C  | 5.2012241362  | 0.0973162886  | 0.3921257267  |
| C  | 4.5095266016  | -1.1023262159 | 0.5241815013  |
| C  | 3.1210687656  | -1.1025197010 | 0.4060550620  |
| C  | 2.3154688029  | -2.3591789622 | 0.6067502455  |
| C  | -0.3448843692 | 3.3352179656  | -1.2253227661 |
| H  | -0.0143156799 | 4.3798820965  | -1.1337228481 |
| H  | -0.1665323714 | 2.9769698801  | -2.2482707229 |
| H  | -1.4233228944 | 3.2728201650  | -1.0210033434 |
| C  | 0.2953881401  | 3.0623669116  | 1.5766328881  |

|    |               |               |               |
|----|---------------|---------------|---------------|
| H  | 0.8936829605  | 2.5394853646  | 2.3362284427  |
| H  | 0.5999521319  | 4.1189305142  | 1.5396985964  |
| H  | -0.7644335612 | 2.9994850691  | 1.8623459868  |
| C  | 0.9493863593  | -2.9281817570 | -1.9123895403 |
| H  | 1.6845997913  | -2.2997939890 | -2.4336212316 |
| H  | 1.3134100384  | -3.9652918841 | -1.8721195375 |
| H  | 0.0038493398  | -2.8946080398 | -2.4717926907 |
| C  | -0.3718620678 | -3.5045394273 | 0.5904063653  |
| H  | 0.0547475331  | -4.5144374418 | 0.5033037887  |
| H  | -1.3684226703 | -3.4857426027 | 0.1265451083  |
| H  | -0.4862924925 | -3.2437083039 | 1.6513684858  |
| H  | 2.3787432360  | 2.5040526911  | -1.5376009523 |
| H  | 2.7561003989  | 3.3412352387  | -0.0281263701 |
| H  | 5.0158437918  | 2.2163519017  | -0.0045392769 |
| H  | 6.2882497149  | 0.1211477067  | 0.4953300502  |
| H  | 5.0377309466  | -2.0342291990 | 0.7316452028  |
| H  | 2.8900922419  | -3.2504907279 | 0.3112095674  |
| H  | 2.0957228057  | -2.4724542861 | 1.6835782003  |
| C  | -4.4853439944 | -0.0440186832 | 0.1461036640  |
| C  | -3.6881371155 | -0.4375848179 | 1.2188367434  |
| H  | -4.1519172139 | -0.7411036968 | 2.1591171091  |
| C  | -2.3017912358 | -0.4463833824 | 1.0647317966  |
| C  | -1.6855564048 | -0.0480808753 | -0.1327910727 |
| C  | -2.5184693777 | 0.3407129693  | -1.1919823465 |
| H  | -2.0884850707 | 0.6523350393  | -2.1474861435 |
| C  | -3.9073300293 | 0.3400327630  | -1.0621586739 |
| H  | -4.5458279543 | 0.6406878722  | -1.8950260962 |
| H  | 0.3297898636  | 0.0740689560  | -1.5672574718 |
| Cl | -6.2110903335 | -0.0364915267 | 0.3162649586  |
| H  | -1.6961772842 | -0.7763843651 | 1.9195709393  |

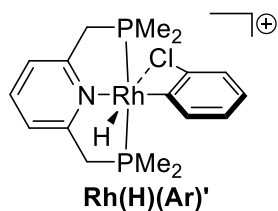

46

**Rh(H)(Ar)'**

|    |               |               |               |
|----|---------------|---------------|---------------|
| H  | -0.0881399767 | 0.1262491999  | 1.7765178579  |
| Rh | 0.0719579578  | 0.0291879584  | 0.2695637209  |
| P  | -0.1669253995 | -2.2401533595 | 0.4444272526  |
| P  | -0.2585247686 | 2.2823321859  | 0.2370523410  |
| N  | -2.0375166802 | -0.0427310026 | -0.0480339213 |
| C  | -1.7140143152 | -2.4082140734 | -0.5637340267 |
| C  | -2.6138383572 | -1.2141960666 | -0.3924378564 |
| C  | -3.9868143833 | -1.2914162125 | -0.6187406267 |
| C  | -4.7571611365 | -0.1380983496 | -0.5136663223 |
| C  | -4.1462810528 | 1.0615401311  | -0.1637642614 |
| C  | -2.7749104251 | 1.0799292713  | 0.0843029814  |
| C  | -2.0799387356 | 2.3231786237  | 0.5697810597  |

|    |               |               |               |
|----|---------------|---------------|---------------|
| C  | 1.0241975180  | -3.3971359676 | -0.2900804254 |
| H  | 0.6354357040  | -4.4256286899 | -0.3052868034 |
| H  | 1.2651599034  | -3.0704398015 | -1.3108906236 |
| H  | 1.9469546599  | -3.3641740975 | 0.3064309544  |
| C  | -0.5792018044 | -2.9368014732 | 2.0728692964  |
| H  | -1.3981926265 | -2.3552571333 | 2.5182252518  |
| H  | -0.8773907178 | -3.9921628969 | 1.9895850943  |
| H  | 0.2991851872  | -2.8567958841 | 2.7284502432  |
| C  | -0.0219090453 | 3.1523829609  | -1.3440527928 |
| H  | -0.5697085070 | 2.6282029658  | -2.1390496102 |
| H  | -0.3668798036 | 4.1950668272  | -1.2818598355 |
| H  | 1.0478043528  | 3.1354610387  | -1.5968977873 |
| C  | 0.4920125982  | 3.3636135884  | 1.4871397412  |
| H  | 0.1043935655  | 4.3906059648  | 1.4232041998  |
| H  | 1.5788918567  | 3.3728934287  | 1.3221607664  |
| H  | 0.2999357599  | 2.9531589168  | 2.4875590933  |
| H  | -1.3752005217 | -2.4480240600 | -1.6145962671 |
| H  | -2.2531982898 | -3.3473886849 | -0.3669672899 |
| H  | -4.4398937096 | -2.2462481766 | -0.8895395965 |
| H  | -5.8326040062 | -0.1746617490 | -0.7004704090 |
| H  | -4.7285736189 | 1.9788290124  | -0.0639865290 |
| H  | -2.5608698160 | 3.2313102110  | 0.1758058111  |
| H  | -2.1788099668 | 2.3637539383  | 1.6692109302  |
| H  | 5.1342473661  | 0.2937068012  | 1.8339124792  |
| C  | 4.3930833697  | 0.1978703514  | 1.0368120100  |
| C  | 3.0315055617  | 0.2031532221  | 1.3582020985  |
| H  | 2.7231066426  | 0.3022821278  | 2.4023374122  |
| C  | 2.0675987962  | 0.0794002405  | 0.3519473084  |
| C  | 2.5538431496  | -0.0421421865 | -0.9468518541 |
| Cl | 1.2395662719  | -0.1886945932 | -2.1486539142 |
| C  | 3.8879122195  | -0.0536921846 | -1.3173403975 |
| H  | 4.1920589835  | -0.1534010887 | -2.3609536211 |
| C  | 4.8215553418  | 0.0705042194  | -0.2855727259 |
| H  | 5.8876455944  | 0.0673484135  | -0.5213385600 |

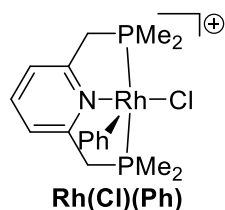

46

**Rh(Cl)(Ph)**

|    |               |               |               |
|----|---------------|---------------|---------------|
| Rh | 0.2089899715  | -0.1921974227 | -0.7231371087 |
| P  | -0.9653975184 | -2.1541580724 | -0.4424522762 |
| P  | 1.0538769958  | 1.9369028196  | -0.8532066831 |
| N  | -1.4499517855 | 0.7213872862  | 0.0636630798  |
| C  | -2.6515412468 | -1.4020990585 | -0.2970608611 |
| C  | -2.6067776171 | 0.0229704776  | 0.1834069275  |
| C  | -3.7497510803 | 0.6295807502  | 0.6998043807  |
| C  | -3.7124653457 | 1.9694113159  | 1.0655462134  |

|    |               |               |               |
|----|---------------|---------------|---------------|
| C  | -2.5239385749 | 2.6755155468  | 0.9214289219  |
| C  | -1.3923520156 | 2.0268857102  | 0.4347217847  |
| C  | -0.0666511317 | 2.7298376010  | 0.3769846886  |
| C  | -1.0612367053 | -3.3283749883 | -1.8215416816 |
| H  | -1.8146485404 | -4.1074413635 | -1.6353157087 |
| H  | -1.2944623235 | -2.7914161350 | -2.7508346699 |
| H  | -0.0705560601 | -3.7893606181 | -1.9409690398 |
| C  | -0.7036343485 | -3.1646011333 | 1.0422913889  |
| H  | -0.7645276792 | -2.5358916144 | 1.9399287024  |
| H  | -1.4442421292 | -3.9757006792 | 1.0934800732  |
| H  | 0.3087589659  | -3.5907666498 | 0.9959505184  |
| C  | 0.7813522167  | 2.7859822093  | -2.4369966840 |
| H  | -0.2734436395 | 2.6926652789  | -2.7318238409 |
| H  | 1.0504144118  | 3.8504594398  | -2.3706756457 |
| H  | 1.4008073720  | 2.2957926522  | -3.2018577217 |
| C  | 2.7472725331  | 2.3280352390  | -0.3506409348 |
| H  | 2.9174936843  | 3.4142217832  | -0.3380733579 |
| H  | 3.4316648732  | 1.8562648832  | -1.0701486440 |
| H  | 2.9380873623  | 1.9016995260  | 0.6434763072  |
| H  | -4.6669081846 | 0.0467537842  | 0.7971821216  |
| H  | -4.6039678939 | 2.4603002123  | 1.4614887157  |
| H  | -2.4581088060 | 3.7269339285  | 1.2046177522  |
| H  | -0.1932373254 | 3.8114010287  | 0.2231552835  |
| H  | 0.4330822694  | 2.5937995813  | 1.3530945819  |
| H  | 4.0147209806  | -1.2651817113 | 2.4363266298  |
| C  | 2.9735051458  | -0.9346258868 | 2.4045108821  |
| C  | 2.2865658348  | -0.6655791101 | 3.5868438132  |
| H  | 2.7823612894  | -0.7792990603 | 4.5529792533  |
| C  | 0.9585561273  | -0.2557721161 | 3.5204594471  |
| H  | 0.4003892113  | -0.0472081850 | 4.4367325702  |
| C  | 0.3187568193  | -0.1102479382 | 2.2855766679  |
| H  | -0.7280380126 | 0.1945464582  | 2.2832110290  |
| C  | 1.0130021123  | -0.3702933265 | 1.0981419742  |
| C  | 2.3482607410  | -0.7904127347 | 1.1645220789  |
| H  | 2.9005620102  | -1.0093387755 | 0.2507970615  |
| H  | -3.3342215422 | -2.0017379415 | 0.3239846981  |
| H  | -3.0745602437 | -1.4101233826 | -1.3175662284 |
| Cl | 1.8018532835  | -1.1100735516 | -2.1301862442 |

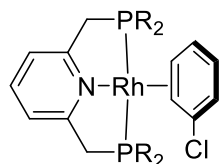

**(tBuL1)Rh-SC-1**

R = tBu

82

**(tBuL1)Rh-SC-1**

|    |               |               |              |
|----|---------------|---------------|--------------|
| Rh | -0.1114988113 | -0.1126675083 | 0.1431065767 |
| P  | 2.1484575552  | 0.6360635923  | 0.2290684847 |
| P  | -2.4523304048 | -0.0662181932 | 0.0555721979 |

|    |               |               |               |
|----|---------------|---------------|---------------|
| N  | -0.4124733952 | 1.8494048842  | -0.5808097721 |
| C  | 1.7356190274  | 2.4375688605  | 0.3619318577  |
| C  | 0.5254758912  | 2.8058384261  | -0.4104288187 |
| C  | 0.3506482639  | 4.1035909175  | -0.8904705323 |
| C  | -0.8259278524 | 4.4405020104  | -1.5435381789 |
| C  | -1.8006334906 | 3.4618035260  | -1.6960218023 |
| C  | -1.5669037628 | 2.1787142868  | -1.2100136201 |
| C  | -2.5787900060 | 1.1020429323  | -1.3675285490 |
| C  | 3.2836237505  | 0.5160942574  | 1.7538719366  |
| C  | 3.1345420721  | 0.5533661328  | -1.3873534068 |
| C  | -3.1488416252 | 0.8718234515  | 1.5570923990  |
| C  | -3.6379153600 | -1.4477552353 | -0.5006772121 |
| H  | 1.5158300288  | 2.6056750212  | 1.4294223093  |
| H  | 2.5823849835  | 3.0881657132  | 0.1069958893  |
| H  | 1.1392539262  | 4.8403919136  | -0.7321747703 |
| H  | -0.9853757434 | 5.4518162063  | -1.9232574081 |
| H  | -2.7444879070 | 3.6785348135  | -2.1979846770 |
| H  | -3.5845759283 | 1.5113506333  | -1.5325982474 |
| H  | -2.3116356349 | 0.5023702316  | -2.2512008853 |
| H  | 2.7479894055  | -3.7081032459 | 2.1512770596  |
| C  | 1.9621323540  | -3.2857575831 | 1.5212317033  |
| C  | 2.0186239517  | -3.4944595402 | 0.1244164948  |
| H  | 2.8377302903  | -4.0605566410 | -0.3218722682 |
| C  | 0.9972408884  | -3.0205686174 | -0.6623907879 |
| Cl | 0.9578293837  | -3.3634850640 | -2.3599788830 |
| C  | -0.1115371530 | -2.3231885135 | -0.1130359166 |
| H  | -1.0141892040 | -2.3344095254 | -0.7167776250 |
| C  | -0.1465734256 | -2.1055740025 | 1.2873316290  |
| H  | -1.0894978540 | -1.8850887532 | 1.7906178506  |
| C  | 0.9133237100  | -2.6017532712 | 2.0916653385  |
| H  | 0.8461442016  | -2.5123227887 | 3.1776103738  |
| C  | -4.3038290755 | 1.8061624799  | 1.1943712306  |
| H  | -4.6431304858 | 2.3224633106  | 2.1067017916  |
| H  | -3.9896803054 | 2.5855315652  | 0.4849439230  |
| H  | -5.1701770355 | 1.2819745388  | 0.7744022683  |
| C  | -2.0156066979 | 1.7165310558  | 2.1579441423  |
| H  | -1.7240049326 | 2.5509068526  | 1.5066097827  |
| H  | -2.3682607164 | 2.1504381697  | 3.1072024585  |
| H  | -1.1170161010 | 1.1118162068  | 2.3612170279  |
| C  | -3.5877685867 | -0.1330940912 | 2.6253956780  |
| H  | -4.4687807410 | -0.7165034545 | 2.3300803922  |
| H  | -2.7795556102 | -0.8314867477 | 2.8923076111  |
| H  | -3.8545056149 | 0.4166526760  | 3.5415574766  |
| C  | -5.0985679135 | -0.9895246411 | -0.5043575543 |
| H  | -5.4957749970 | -0.8321688473 | 0.5064872775  |
| H  | -5.2512254485 | -0.0700976409 | -1.0873287021 |
| H  | -5.7109749594 | -1.7760684037 | -0.9731744595 |
| C  | -3.2659124536 | -1.8302151671 | -1.9432055541 |
| H  | -3.7458216133 | -2.7902254818 | -2.1877897892 |
| H  | -3.6344136876 | -1.0941189904 | -2.6709386428 |
| H  | -2.1856053512 | -1.9536172463 | -2.1113604418 |
| C  | -3.5083974347 | -2.6876883365 | 0.3938335389  |

|   |               |               |               |
|---|---------------|---------------|---------------|
| H | -4.2419037002 | -3.4372880321 | 0.0575752629  |
| H | -2.5192399043 | -3.1569694764 | 0.3329434313  |
| H | -3.7224874607 | -2.4776287359 | 1.4484415925  |
| C | 2.3467647867  | 0.3727480524  | 2.9565442816  |
| H | 1.6423767724  | 1.2153673069  | 3.0387295242  |
| H | 1.7578076913  | -0.5476341645 | 2.9014756753  |
| H | 2.9426592363  | 0.3530769835  | 3.8828862144  |
| C | 4.1446273776  | 1.7662102197  | 1.9701892037  |
| H | 4.7860076182  | 2.0063241128  | 1.1143709892  |
| H | 3.5514497006  | 2.6556967530  | 2.2211691320  |
| H | 4.8067503299  | 1.5780017194  | 2.8303697625  |
| C | 4.2071066795  | -0.6972665634 | 1.6598077970  |
| H | 3.6636408593  | -1.6120446645 | 1.3979064297  |
| H | 5.0083510384  | -0.5441883950 | 0.9236398214  |
| H | 4.6894735976  | -0.8605554542 | 2.6366026027  |
| C | 3.5442923379  | -0.8904398572 | -1.6732063554 |
| H | 2.6686050430  | -1.5389624523 | -1.7772319854 |
| H | 4.0896615157  | -0.9214647364 | -2.6296668605 |
| H | 4.2022682217  | -1.3112763920 | -0.9037759790 |
| C | 2.1698742236  | 0.9958685566  | -2.4941442219 |
| H | 1.2362102965  | 0.4125631121  | -2.4685305643 |
| H | 1.9162068861  | 2.0640097434  | -2.4323429823 |
| H | 2.6495555007  | 0.8297901414  | -3.4715016539 |
| C | 4.3756663895  | 1.4439683752  | -1.4058545625 |
| H | 4.8043609089  | 1.4291761405  | -2.4205589500 |
| H | 4.1592129416  | 2.4949837977  | -1.1653954249 |
| H | 5.1558103801  | 1.0831686340  | -0.7225232945 |

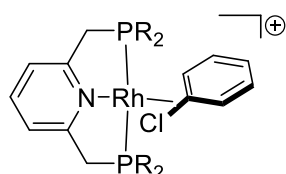

**(tBuL1)Rh-SC-2**

R = tBu

82

**(tBuL1)Rh-SC-2**

|    |               |               |               |
|----|---------------|---------------|---------------|
| Rh | 0.0119317143  | -0.1862918546 | 0.1279565347  |
| P  | -2.2196424778 | -0.7669086223 | 0.2241101057  |
| P  | 2.3317617119  | -0.1951739314 | 0.0525102904  |
| N  | 0.2371874127  | -2.0260941417 | -0.7310797279 |
| C  | -1.9854864789 | -2.5959384776 | 0.1079033251  |
| C  | -0.7589189898 | -2.9451442078 | -0.6665293424 |
| C  | -0.6286117622 | -4.2032983143 | -1.2509550149 |
| C  | 0.5554057311  | -4.5500416361 | -1.8870982974 |
| C  | 1.5850544958  | -3.6186811467 | -1.9209259008 |
| C  | 1.4013470916  | -2.3643744466 | -1.3448478351 |
| C  | 2.4771987430  | -1.3333162554 | -1.3987083385 |
| C  | -3.1388821237 | -0.5901972597 | 1.8653494547  |
| C  | -3.2910943617 | -0.3337852568 | -1.2673277198 |
| C  | 3.0573665335  | -1.1659394998 | 1.5138291849  |

|    |               |               |               |
|----|---------------|---------------|---------------|
| C  | 3.4338505969  | 1.2660478427  | -0.4303339285 |
| H  | -1.8330973841 | -2.9345745602 | 1.1459874683  |
| H  | -2.8661000517 | -3.1334345249 | -0.2723602580 |
| H  | -1.4581038654 | -4.9085822980 | -1.1830868475 |
| H  | 0.6772013012  | -5.5346794238 | -2.3429952748 |
| H  | 2.5367629140  | -3.8481909735 | -2.4020080434 |
| H  | 3.4670968387  | -1.7927220950 | -1.5253909835 |
| H  | 2.2969365328  | -0.6967008131 | -2.2785900964 |
| H  | -0.6346987839 | 4.6864310169  | 1.7075182037  |
| C  | -0.5736507443 | 4.5252271449  | 0.6298901286  |
| C  | -0.4107342821 | 3.2462957092  | 0.1105932089  |
| Cl | -0.2983591944 | 1.9036540093  | 1.2423821085  |
| C  | -0.3244106058 | 2.9950323912  | -1.2523894476 |
| H  | -0.2008310880 | 1.9638512800  | -1.5956562404 |
| C  | -0.4049471879 | 4.0747045586  | -2.1304631968 |
| H  | -0.3401099470 | 3.8982250992  | -3.2064203677 |
| C  | -0.5681111349 | 5.3693859961  | -1.6396495443 |
| H  | -0.6303412037 | 6.2114780910  | -2.3317168012 |
| C  | -0.6525671997 | 5.5911296931  | -0.2649870264 |
| H  | -0.7804107629 | 6.6047502079  | 0.1207434234  |
| C  | 3.0460547348  | 1.6797281383  | -1.8549854318 |
| H  | 3.4719939022  | 2.6731505252  | -2.0647190973 |
| H  | 3.4431862692  | 0.9920408882  | -2.6149262764 |
| H  | 1.9568161666  | 1.7578246970  | -1.9811199042 |
| C  | 4.9267137711  | 0.9409596262  | -0.4065026028 |
| H  | 5.4838840354  | 1.7999939527  | -0.8132030420 |
| H  | 5.3029979710  | 0.7646992265  | 0.6095896778  |
| H  | 5.1763178627  | 0.0681594312  | -1.0280286233 |
| C  | 3.3390729954  | -0.1934064056 | 2.6616168900  |
| H  | 4.1793076613  | 0.4806385323  | 2.4486864964  |
| H  | 2.4546002355  | 0.4158911283  | 2.9049579677  |
| H  | 3.6023144847  | -0.7683383748 | 3.5635158600  |
| C  | 4.3129833763  | -1.9639137251 | 1.1610905992  |
| H  | 5.1445191904  | -1.3389009994 | 0.8162669176  |
| H  | 4.6568415084  | -2.5014591208 | 2.0594448125  |
| H  | 4.1093881315  | -2.7251932746 | 0.3938155414  |
| C  | 1.9794825962  | -2.1524206898 | 1.9820505590  |
| H  | 2.3298010767  | -2.6502772789 | 2.9003836999  |
| H  | 1.0283021835  | -1.6399313230 | 2.1947288532  |
| H  | 1.7832905626  | -2.9370574838 | 1.2378038047  |
| C  | -2.0809190146 | -0.7551553221 | 2.9635656431  |
| H  | -1.3228319246 | 0.0388235128  | 2.9306951331  |
| H  | -2.5740395505 | -0.7137089322 | 3.9477984315  |
| H  | -1.5557245825 | -1.7205607379 | 2.9021158130  |
| C  | -3.7621896767 | 0.8030749675  | 1.9728970985  |
| H  | -3.0424776728 | 1.6007569803  | 1.7385311449  |
| H  | -4.6339345324 | 0.9149709015  | 1.3139858529  |
| H  | -4.1127790430 | 0.9618906743  | 3.0049378768  |
| C  | -4.2211588304 | -1.6547649639 | 2.0638134683  |
| H  | -4.7164024827 | -1.4803756457 | 3.0324066385  |
| H  | -4.9961030438 | -1.6222675711 | 1.2892818808  |
| H  | -3.8093600296 | -2.6735516623 | 2.0956820448  |

|   |               |               |               |
|---|---------------|---------------|---------------|
| C | -3.4301990524 | 1.1870195303  | -1.3646588094 |
| H | -2.4546122106 | 1.6884667398  | -1.3233184562 |
| H | -3.8997137282 | 1.4460357764  | -2.3269970193 |
| H | -4.0591553062 | 1.6060334398  | -0.5701264515 |
| C | -4.6721119163 | -0.9845614044 | -1.2545306418 |
| H | -5.3170483980 | -0.5719431031 | -0.4669983387 |
| H | -5.1718997748 | -0.7904082713 | -2.2171551501 |
| H | -4.6254911833 | -2.0766323839 | -1.1292039213 |
| C | -2.4990729379 | -0.8278245514 | -2.4840595961 |
| H | -1.4797211401 | -0.4112845011 | -2.4950439579 |
| H | -2.4198962864 | -1.9242028524 | -2.5186989574 |
| H | -3.0133345518 | -0.5075152224 | -3.4037469817 |
| C | 3.1342572388  | 2.4438857140  | 0.5023477466  |
| H | 3.7895969947  | 3.2873564387  | 0.2337912187  |
| H | 2.0970558186  | 2.7834313737  | 0.3939684866  |
| H | 3.3099223328  | 2.2122837098  | 1.5597036598  |

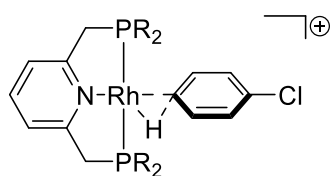

**(tBuL1)Rh-H-TS**

R = tBu

82

**(tBuL1)Rh-H-TS**

|    |               |               |               |
|----|---------------|---------------|---------------|
| Rh | 0.2439804725  | 0.0788859077  | -0.0578455330 |
| P  | -1.2353595347 | 1.8809526168  | -0.2108033022 |
| P  | 2.1930309825  | -1.1873985102 | -0.0447149076 |
| N  | 1.5731342206  | 1.5485329230  | 0.6981965080  |
| C  | 0.0431275241  | 3.2254575962  | -0.1832476279 |
| C  | 1.2655561614  | 2.8587086603  | 0.5917975312  |
| C  | 2.1023493143  | 3.8394834948  | 1.1230021369  |
| C  | 3.2886167794  | 3.4619379524  | 1.7393281618  |
| C  | 3.6158903903  | 2.1120651369  | 1.8065098095  |
| C  | 2.7349396752  | 1.1704343930  | 1.2808369753  |
| C  | 3.0299910689  | -0.2944513712 | 1.3482357261  |
| C  | -2.1415490315 | 2.2533120444  | -1.8262008919 |
| C  | -2.2841106129 | 2.2199708715  | 1.3189481409  |
| C  | 3.2479461507  | -0.8143126015 | -1.5769282642 |
| C  | 2.2697002522  | -3.0106795967 | 0.4415617828  |
| H  | -0.3581166740 | 4.1963321951  | 0.1403272870  |
| H  | 1.8258195671  | 4.8907112205  | 1.0315756047  |
| H  | 3.9604446368  | 4.2157016463  | 2.1557985164  |
| H  | 4.5454042962  | 1.7805460333  | 2.2711122536  |
| H  | 4.1108816961  | -0.4808022746 | 1.4164957481  |
| H  | 2.5761012636  | -0.6977314279 | 2.2668302981  |
| C  | -3.4245259481 | -3.0780406702 | 0.2585928296  |
| C  | -2.5504990314 | -2.7550716709 | 1.2971631292  |
| H  | -2.7103543037 | -3.1733261262 | 2.2925283082  |
| C  | -1.4812634940 | -1.8992407009 | 1.0525705483  |

|    |               |               |               |
|----|---------------|---------------|---------------|
| C  | -1.2672378728 | -1.3196841330 | -0.2128123097 |
| C  | -2.1575180420 | -1.6791940148 | -1.2353851943 |
| H  | -2.0246309055 | -1.2875866069 | -2.2463923416 |
| C  | -3.2271109047 | -2.5475276767 | -1.0110411014 |
| H  | -3.9040296183 | -2.8141742574 | -1.8244419212 |
| H  | -0.1506838468 | -0.8810498062 | -1.1917712430 |
| Cl | -4.7509307009 | -4.1502183964 | 0.5534588575  |
| H  | -0.8225310840 | -1.6535324705 | 1.8888893284  |
| C  | 2.9329573739  | 0.6159508665  | -2.0329589370 |
| H  | 3.4567070839  | 0.8034728897  | -2.9836887766 |
| H  | 1.8537354744  | 0.7625546374  | -2.1909972437 |
| H  | 3.2820593232  | 1.3699601224  | -1.3138503837 |
| C  | 2.8370187408  | -1.7705640404 | -2.6985083390 |
| H  | 3.1217061213  | -2.8104086650 | -2.4934138150 |
| H  | 1.7526322076  | -1.7357566871 | -2.8863402124 |
| H  | 3.3437604765  | -1.4695603409 | -3.6287519916 |
| C  | 4.7506933415  | -0.9077530896 | -1.3082883005 |
| H  | 5.0735747102  | -1.9020697231 | -0.9811633511 |
| H  | 5.2915250629  | -0.6764398113 | -2.2397380990 |
| H  | 5.0784821535  | -0.1717541264 | -0.5595046002 |
| C  | 3.6595037610  | -3.6317827518 | 0.3028819712  |
| H  | 3.6265263939  | -4.6565165632 | 0.7053855332  |
| H  | 3.9872896417  | -3.7069405816 | -0.7421712921 |
| H  | 4.4244738312  | -3.0837403825 | 0.8728732217  |
| C  | 1.8402486692  | -3.1126750321 | 1.9097684883  |
| H  | 1.6422886129  | -4.1694462534 | 2.1462744990  |
| H  | 2.6236992209  | -2.7687573985 | 2.6000925212  |
| H  | 0.9166574289  | -2.5554124775 | 2.1141778424  |
| C  | 1.2583386486  | -3.7778703447 | -0.4187915478 |
| H  | 1.2680887905  | -4.8369636828 | -0.1171520390 |
| H  | 0.2374475365  | -3.3989563217 | -0.2806165359 |
| H  | 1.4968392994  | -3.7403125629 | -1.4888301933 |
| H  | 0.3517052549  | 3.3497450379  | -1.2350047163 |
| C  | -1.2622637943 | 1.6790570631  | -2.9422162240 |
| H  | -1.1690003810 | 0.5879172562  | -2.8706415965 |
| H  | -1.7099739382 | 1.9234581091  | -3.9184024195 |
| H  | -0.2446267162 | 2.0992652282  | -2.9335448565 |
| C  | -3.5077041793 | 1.5652332695  | -1.8421625470 |
| H  | -3.4498882430 | 0.5064556086  | -1.5565718172 |
| H  | -4.2234779451 | 2.0646489948  | -1.1754921170 |
| H  | -3.9221739317 | 1.6176709859  | -2.8612753673 |
| C  | -2.3280080077 | 3.7542415598  | -2.0696199276 |
| H  | -2.8817996171 | 3.8882060085  | -3.0123543959 |
| H  | -2.9074297668 | 4.2456429070  | -1.2787039464 |
| H  | -1.3742258323 | 4.2880164236  | -2.1827052350 |
| C  | -3.3178872399 | 1.1044810183  | 1.4993281911  |
| H  | -2.8525384751 | 0.1111897301  | 1.5281218863  |
| H  | -3.8417110540 | 1.2608041281  | 2.4555700941  |
| H  | -4.0765702901 | 1.0996625886  | 0.7080402801  |
| C  | -2.9864190328 | 3.5759190810  | 1.2929063088  |
| H  | -3.7747015803 | 3.6165194130  | 0.5297146707  |
| H  | -3.4700344681 | 3.7469114801  | 2.2678151454  |

|   |               |              |              |
|---|---------------|--------------|--------------|
| H | -2.2945354156 | 4.4143435429 | 1.1238919403 |
| C | -1.3056804801 | 2.1711521045 | 2.4991281597 |
| H | -0.7424554112 | 1.2249443080 | 2.5209744743 |
| H | -0.5845343724 | 3.0015342172 | 2.4863317654 |
| H | -1.8738479111 | 2.2461706196 | 3.4393884147 |

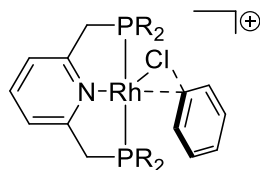

**(tBuL1)Rh-Cl-TS**

R = tBu

82

**(tBuL1)Rh-Cl-TS**

|    |               |               |               |
|----|---------------|---------------|---------------|
| Rh | 0.0607256832  | 0.1520513017  | 0.2091639656  |
| P  | 2.4221788399  | -0.0915411855 | 0.0522723667  |
| P  | -2.1867172528 | -0.5158026977 | 0.3711855885  |
| N  | 0.1794999273  | -1.5583228761 | -0.9756690994 |
| C  | 2.4031851263  | -0.8441903965 | -1.6405530538 |
| C  | 1.2677599518  | -1.8026833362 | -1.7436340347 |
| C  | 1.3442598600  | -2.9318441331 | -2.5567587346 |
| C  | 0.2983056762  | -3.8458204713 | -2.5622025840 |
| C  | -0.7709526176 | -3.6373417644 | -1.6991027561 |
| C  | -0.7907627353 | -2.5016871377 | -0.8945398426 |
| C  | -1.8077562852 | -2.3137459922 | 0.1728150213  |
| C  | 3.8374683306  | 1.1923067598  | -0.0790250489 |
| C  | 2.9105380270  | -1.4588081955 | 1.2864595657  |
| C  | -3.3970673825 | -0.2257131957 | -1.0833049301 |
| C  | -3.0437003965 | -0.4812545207 | 2.0547979884  |
| H  | 2.2263155911  | 0.0044010643  | -2.3203211194 |
| H  | 3.3495175668  | -1.3172901554 | -1.9391271560 |
| H  | 2.2300883136  | -3.0848838628 | -3.1745451787 |
| H  | 0.3330291506  | -4.7286377273 | -3.2039245835 |
| H  | -1.5807998212 | -4.3637179129 | -1.6189326816 |
| H  | -2.6887996304 | -2.9467254406 | 0.0193696018  |
| H  | -1.3403900672 | -2.6269352057 | 1.1197288564  |
| H  | 0.8793466127  | 3.9934631881  | -2.7527785208 |
| C  | 0.1374730304  | 3.6542146131  | -2.0255394012 |
| C  | 0.5390094988  | 2.8009437904  | -0.9978159088 |
| H  | 1.5780067478  | 2.5194591963  | -0.8918466625 |
| C  | -0.4054256978 | 2.3163444367  | -0.0926325222 |
| Cl | 0.1569400372  | 1.8940233159  | 1.7789769225  |
| C  | -1.7097205736 | 2.8268820678  | -0.1092076151 |
| H  | -2.4078320448 | 2.5524982581  | 0.6777288605  |
| C  | -2.0900341390 | 3.6985292197  | -1.1224309287 |
| H  | -3.1137319609 | 4.0805840243  | -1.1374670627 |
| C  | -1.1796234940 | 4.0987869845  | -2.1030863486 |
| H  | -1.4863783807 | 4.7855718208  | -2.8938443897 |
| C  | -4.4268361894 | 0.8655378510  | -0.7834691971 |
| H  | -3.9697160205 | 1.8164870115  | -0.4946394141 |

|   |               |               |               |
|---|---------------|---------------|---------------|
| H | -5.0099268992 | 1.0523844967  | -1.6989750518 |
| H | -5.1380022433 | 0.5637563847  | -0.0028692238 |
| C | -4.1634478932 | -1.5003826703 | -1.4548678505 |
| H | -4.7353700623 | -1.9227679296 | -0.6169686960 |
| H | -4.8866165549 | -1.2476846768 | -2.2462107988 |
| H | -3.5076163941 | -2.2799922096 | -1.8665247456 |
| C | -2.5391494450 | 0.1880469439  | -2.2856098940 |
| H | -1.9759100019 | 1.1103704955  | -2.0983283799 |
| H | -1.8232954536 | -0.5972786442 | -2.5672500067 |
| H | -3.1986245614 | 0.3574622070  | -3.1516543358 |
| C | -3.3953454127 | 0.9554326762  | 2.4519158468  |
| H | -2.4939738764 | 1.5782127358  | 2.5353318043  |
| H | -4.1015373624 | 1.4327094832  | 1.7614227059  |
| H | -3.8733820306 | 0.9389013305  | 3.4439235949  |
| C | -4.2955203847 | -1.3583000630 | 2.0792005628  |
| H | -4.7108021313 | -1.3630159498 | 3.0994623077  |
| H | -5.0814297776 | -0.9852987579 | 1.4097216243  |
| H | -4.0810969548 | -2.4036651750 | 1.8133937212  |
| C | -2.0274003351 | -1.0060526314 | 3.0771719507  |
| H | -1.0729377257 | -0.4633064358 | 3.0134864020  |
| H | -2.4354629152 | -0.8582053443 | 4.0890835749  |
| H | -1.8293634054 | -2.0817084604 | 2.9685087706  |
| C | 1.7110338118  | -2.3862167897 | 1.5231107924  |
| H | 1.9601481532  | -3.0599168443 | 2.3579001074  |
| H | 0.8066980851  | -1.8203760344 | 1.7950326385  |
| H | 1.4883629525  | -3.0162492268 | 0.6514826724  |
| C | 3.2082807076  | -0.7725449392 | 2.6247951669  |
| H | 4.1054729844  | -0.1429149331 | 2.6033724928  |
| H | 2.3590172759  | -0.1508400024 | 2.9490855878  |
| H | 3.3692099791  | -1.5433722671 | 3.3946181714  |
| C | 4.0713705893  | -2.3388253038 | 0.8194670640  |
| H | 5.0215813563  | -1.8063654686 | 0.7245278018  |
| H | 4.2208262767  | -3.1441427820 | 1.5563672161  |
| H | 3.8470524717  | -2.8249522048 | -0.1422854311 |
| C | 3.5793195454  | 2.3034156478  | 0.9461451442  |
| H | 4.3909522479  | 3.0450643312  | 0.8820160429  |
| H | 2.6294929465  | 2.8266547891  | 0.7829953974  |
| H | 3.5626931575  | 1.9192837919  | 1.9747405553  |
| C | 5.2309309252  | 0.6055090318  | 0.1668872269  |
| H | 5.9669693146  | 1.4090926212  | 0.0068042482  |
| H | 5.3772196329  | 0.2381658695  | 1.1890744364  |
| H | 5.4757616231  | -0.1998453336 | -0.5395014761 |
| C | 3.8902063740  | 1.7736629906  | -1.5015160667 |
| H | 4.3153180741  | 1.0535240583  | -2.2145127572 |
| H | 2.9293858319  | 2.1115616897  | -1.9071671141 |
| H | 4.5593277653  | 2.6479919769  | -1.4896671904 |

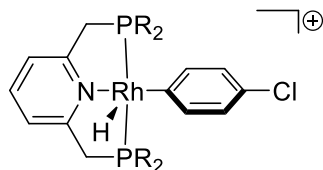

**(tBuL1)Rh(H)(Ar)**

R = tBu

82

**(tBuL1)Rh(H)(Ar)**

|    |               |               |               |
|----|---------------|---------------|---------------|
| H  | 0.2462941717  | 0.0411290268  | 1.4904999813  |
| Rh | 0.2679462766  | -0.0467779998 | -0.0037730051 |
| P  | 1.1877020692  | 2.0876510955  | -0.0644066060 |
| P  | -0.0684479498 | -2.3277808093 | 0.1557745546  |
| N  | 2.3395895361  | -0.6193448397 | -0.0763069223 |
| C  | 2.8173703521  | 1.6465483832  | -0.8418698334 |
| C  | 3.2733718941  | 0.2634288810  | -0.4802566884 |
| C  | 4.6126690353  | -0.1114663839 | -0.5871290635 |
| C  | 4.9778902966  | -1.4175663426 | -0.2829638277 |
| C  | 4.0045299126  | -2.3135836825 | 0.1486507299  |
| C  | 2.6852945967  | -1.8799335717 | 0.2608037354  |
| C  | 1.6097995514  | -2.7589559105 | 0.8218770386  |
| C  | 0.4648384762  | 3.3323321690  | -1.2775959408 |
| C  | 1.6431142632  | 2.8243053606  | 1.6077524377  |
| C  | -0.1005234191 | -3.1198356486 | -1.5636062417 |
| C  | -1.2633254930 | -3.1003898626 | 1.3851882066  |
| H  | 2.6480368060  | 1.6847127695  | -1.9308663843 |
| H  | 3.6024183775  | 2.3872126686  | -0.6288477398 |
| H  | 5.3547949728  | 0.6167771324  | -0.9179016777 |
| H  | 6.0191094059  | -1.7348589924 | -0.3727702891 |
| H  | 4.2635340969  | -3.3390640002 | 0.4161550040  |
| H  | 1.8646175495  | -3.8216552357 | 0.7198894385  |
| H  | 1.5474057726  | -2.5492238599 | 1.9021167660  |
| H  | -4.2805430220 | 1.6421436570  | 1.9265502371  |
| C  | -3.7506322008 | 1.2594261500  | 1.0522424308  |
| C  | -2.3912205711 | 0.9527557879  | 1.1221534568  |
| H  | -1.8882066910 | 1.1084465138  | 2.0781697306  |
| C  | -1.6800689097 | 0.4552436690  | 0.0182961059  |
| C  | -2.4133159292 | 0.2741336216  | -1.1678424741 |
| H  | -1.9270098393 | -0.1284310549 | -2.0630540941 |
| C  | -3.7705476368 | 0.5798756960  | -1.2641890048 |
| H  | -4.3138426384 | 0.4305105128  | -2.1991079319 |
| C  | -4.4366321820 | 1.0733769056  | -0.1450762073 |
| Cl | -6.1268965667 | 1.4496788165  | -0.2430109517 |
| C  | 0.6680465579  | -4.4396232706 | -1.6289815618 |
| H  | 0.2846588648  | -5.1889260821 | -0.9234871559 |
| H  | 0.5682397450  | -4.8617297132 | -2.6419167355 |
| H  | 1.7434246218  | -4.3044382160 | -1.4436906509 |
| C  | -1.5407735224 | -3.3332932440 | -2.0323258738 |
| H  | -2.0311805497 | -4.1527968601 | -1.4910034318 |
| H  | -2.1570818734 | -2.4294826826 | -1.9245463345 |
| H  | -1.5291872378 | -3.6079846164 | -3.0989241560 |

|   |               |               |               |
|---|---------------|---------------|---------------|
| C | 0.5781708018  | -2.1035096705 | -2.4942370733 |
| H | 0.5207654687  | -2.4636873528 | -3.5338384007 |
| H | 0.0776145214  | -1.1192471188 | -2.4695829036 |
| H | 1.6405557769  | -1.9592719989 | -2.2543643853 |
| C | -0.9743484922 | -2.4522388172 | 2.7443285899  |
| H | -1.0681531710 | -1.3577766538 | 2.6966626363  |
| H | -1.7157006677 | -2.8186489754 | 3.4708512724  |
| H | 0.0172329503  | -2.7065329774 | 3.1448941924  |
| C | -2.7097722421 | -2.7622204699 | 1.0057922252  |
| H | -3.3685579297 | -3.1033176617 | 1.8195226397  |
| H | -2.8612805229 | -1.6818334300 | 0.8812334007  |
| H | -3.0380227043 | -3.2661186926 | 0.0906808544  |
| C | -1.0761574183 | -4.6153017637 | 1.4766042521  |
| H | -1.7411151085 | -5.0136148035 | 2.2589397054  |
| H | -1.3416217671 | -5.1209117786 | 0.5381539386  |
| H | -0.0483919406 | -4.8999030376 | 1.7473420433  |
| C | 0.0309786588  | 2.5060850812  | -2.4940756701 |
| H | -0.7474043928 | 1.7811297886  | -2.2256281311 |
| H | -0.3932564255 | 3.1811900432  | -3.2535683858 |
| H | 0.8682216148  | 1.9739043060  | -2.9728848794 |
| C | 1.4592365306  | 4.4018159638  | -1.7340570338 |
| H | 0.9713417002  | 5.0282430524  | -2.4975343035 |
| H | 1.7771516647  | 5.0665001118  | -0.9231215330 |
| H | 2.3576690027  | 3.9711713657  | -2.2000647577 |
| C | -0.7739888263 | 3.9760188955  | -0.6502104720 |
| H | -1.4895789201 | 3.2210226310  | -0.2916476212 |
| H | -0.5166333945 | 4.6448367465  | 0.1830024665  |
| H | -1.2851558001 | 4.5863633749  | -1.4109629664 |
| C | 0.3887436172  | 2.8859509137  | 2.4823511728  |
| H | -0.0050065802 | 1.8793688586  | 2.6788495437  |
| H | 0.6488954133  | 3.3397965207  | 3.4513269921  |
| H | -0.4169640187 | 3.4832302905  | 2.0367335332  |
| C | 2.2724197256  | 4.2118669569  | 1.4956882275  |
| H | 1.5515958545  | 4.9669349794  | 1.1560348009  |
| H | 2.6264870739  | 4.5232486637  | 2.4909835228  |
| H | 3.1411582690  | 4.2294198655  | 0.8213035772  |
| C | 2.6464654450  | 1.8694081720  | 2.2646691793  |
| H | 2.2622533502  | 0.8404670956  | 2.3213136153  |
| H | 3.6154316054  | 1.8501716135  | 1.7454918180  |
| H | 2.8366483473  | 2.2122040861  | 3.2936486024  |

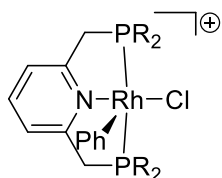

**(tBuL1)Rh(Cl)(Ph)**

R = tBu

82

**(tBuL1)Rh(Cl)(Ph)**

|    |               |              |              |
|----|---------------|--------------|--------------|
| Rh | -0.0035338822 | 0.1583816586 | 0.3198111972 |
|----|---------------|--------------|--------------|

|    |               |               |               |
|----|---------------|---------------|---------------|
| P  | 2.3728032790  | 0.3532097464  | 0.1535193309  |
| P  | -2.3111370392 | 0.3614584381  | 0.1024085415  |
| N  | 0.0086810693  | 0.5683147518  | -1.7068877019 |
| C  | 2.3667016903  | 1.2226323497  | -1.4805985713 |
| C  | 1.1529658250  | 0.9607730816  | -2.3150043004 |
| C  | 1.1795277540  | 1.2277844020  | -3.6838761503 |
| C  | 0.0075367419  | 1.1545886906  | -4.4229830554 |
| C  | -1.1743087087 | 0.8201623007  | -3.7720132439 |
| C  | -1.1500973239 | 0.5182393730  | -2.4136245363 |
| C  | -2.3937818185 | 0.0717623174  | -1.7143596047 |
| C  | 3.1439609703  | 1.6512202508  | 1.2936262508  |
| C  | -2.6645022557 | 2.1994658551  | 0.3654675868  |
| C  | -3.6379433225 | -0.7564758338 | 0.8425501301  |
| H  | 2.1213734506  | 1.5197095936  | -4.1504544693 |
| H  | 0.0105708692  | 1.3713317059  | -5.4932791725 |
| H  | -2.1203994716 | 0.7721669393  | -4.3127168676 |
| H  | -3.2919545735 | 0.4857010819  | -2.1922515306 |
| H  | -2.4520309119 | -1.0245687640 | -1.8091682096 |
| H  | -0.3883401032 | -4.6616332489 | 1.8955957972  |
| C  | -0.3621858435 | -4.0307283182 | 1.0036571618  |
| C  | -0.5001157452 | -4.5982051092 | -0.2611383314 |
| H  | -0.6362555859 | -5.6754534550 | -0.3751810458 |
| C  | -0.4533900140 | -3.7696844026 | -1.3778951260 |
| H  | -0.5444470006 | -4.1920577472 | -2.3817811863 |
| C  | -0.2820522252 | -2.3900758832 | -1.2347447484 |
| H  | -0.2255163544 | -1.7918061578 | -2.1431944627 |
| C  | -0.1604796894 | -1.8129380174 | 0.0355122642  |
| C  | -0.1948641578 | -2.6534708104 | 1.1578008054  |
| H  | -0.0945065050 | -2.2361368783 | 2.1583388690  |
| H  | 3.2868775263  | 1.0524767218  | -2.0576932179 |
| H  | 2.3563744192  | 2.2995434189  | -1.2406782275 |
| Cl | -0.0548575210 | 0.1980286284  | 2.6588798019  |
| C  | -1.3717649698 | 2.9386767658  | -0.0052488341 |
| H  | -1.4974644646 | 4.0112239268  | 0.2130189151  |
| H  | -0.5142994612 | 2.6012461194  | 0.6023140450  |
| H  | -1.1174621298 | 2.8483335135  | -1.0701744699 |
| C  | -3.7956048773 | 2.7369581020  | -0.5105762083 |
| H  | -3.5750207240 | 2.6294771241  | -1.5829454472 |
| H  | -4.7632805509 | 2.2643282375  | -0.3060101866 |
| H  | -3.9103532155 | 3.8149824378  | -0.3135038609 |
| C  | -2.9453390868 | 2.4519189213  | 1.8492968071  |
| H  | -3.9041960846 | 2.0277181021  | 2.1728165470  |
| H  | -2.1476750445 | 2.0427655882  | 2.4874323779  |
| H  | -2.9944672284 | 3.5389668060  | 2.0195263119  |
| C  | -5.0366628353 | -0.1710585921 | 0.6387376463  |
| H  | -5.2658047499 | 0.0029039674  | -0.4233152353 |
| H  | -5.7726894098 | -0.8991615548 | 1.0138247723  |
| H  | -5.1947995258 | 0.7630572579  | 1.1918348933  |
| C  | -3.3391942504 | -0.9417454908 | 2.3322855749  |
| H  | -4.1009228582 | -1.6112946392 | 2.7610367854  |
| H  | -2.3505556207 | -1.3891684541 | 2.4913372908  |
| H  | -3.3676412535 | 0.0006824145  | 2.8918909990  |

|   |               |               |               |
|---|---------------|---------------|---------------|
| C | -3.5930679435 | -2.1259122776 | 0.1539971029  |
| H | -3.9476355109 | -2.0848579698 | -0.8859236228 |
| H | -2.5987510535 | -2.5865722211 | 0.1761971096  |
| H | -4.2790708514 | -2.7951630994 | 0.6956263153  |
| C | 2.0796122691  | 2.7304851394  | 1.5202962599  |
| H | 1.7633682608  | 3.2167687175  | 0.5835846856  |
| H | 1.2002432572  | 2.3280245190  | 2.0408362507  |
| H | 2.5098302330  | 3.5211649356  | 2.1545721448  |
| C | 4.3831235332  | 2.3247131533  | 0.6969668238  |
| H | 4.1750486335  | 2.8340932669  | -0.2555437302 |
| H | 4.7228921593  | 3.1000757548  | 1.4018727564  |
| H | 5.2206379469  | 1.6373726240  | 0.5432090748  |
| C | 3.4831518263  | 0.9957716506  | 2.6345764429  |
| H | 2.6190488465  | 0.4562616442  | 3.0481400826  |
| H | 4.3344103154  | 0.3061338342  | 2.5555735680  |
| H | 3.7659396197  | 1.7805295345  | 3.3535165108  |
| C | 4.9715397689  | -0.7803106592 | -0.1974060275 |
| H | 5.5320960078  | -1.6945883056 | -0.4484979079 |
| H | 5.1740217144  | -0.0494056123 | -0.9948022709 |
| H | 5.3833541247  | -0.3980285916 | 0.7450156880  |
| C | 3.4915566814  | -1.1457396036 | -0.0877701618 |
| C | 3.2744299319  | -2.1043610452 | 1.0862361270  |
| H | 3.8944710156  | -3.0012801411 | 0.9318061872  |
| H | 3.5622454220  | -1.6628389252 | 2.0486613674  |
| H | 2.2281851471  | -2.4251205182 | 1.1551289816  |
| C | 3.0668029771  | -1.8302849608 | -1.3899151003 |
| H | 3.2573911070  | -1.2066697240 | -2.2757237233 |
| H | 3.6620666620  | -2.7489592044 | -1.5090245411 |
| H | 2.0117047290  | -2.1249035207 | -1.3804210255 |

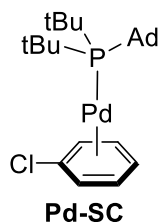

65

**Pd-SC**

|   |           |           |           |
|---|-----------|-----------|-----------|
| P | -0.573296 | -1.209615 | 0.085261  |
| C | -1.453366 | -2.656565 | -0.835083 |
| C | -0.350596 | -1.717356 | 1.933760  |
| C | -2.625254 | -3.319613 | -0.091527 |
| H | -3.071454 | -4.087525 | -0.735860 |
| H | -2.306810 | -3.817190 | 0.825920  |
| H | -3.412373 | -2.608303 | 0.164590  |
| C | -1.956179 | -2.153372 | -2.202506 |
| H | -1.157768 | -1.654212 | -2.758570 |
| H | -2.284516 | -3.017893 | -2.791595 |
| H | -2.806115 | -1.475099 | -2.122607 |
| C | -0.381055 | -3.720424 | -1.161899 |
| H | -0.828100 | -4.486297 | -1.807752 |

|    |           |           |           |
|----|-----------|-----------|-----------|
| H  | 0.459826  | -3.265013 | -1.694036 |
| H  | 0.012329  | -4.223046 | -0.280774 |
| C  | 0.735098  | -0.804988 | 2.550948  |
| H  | 0.441153  | 0.240150  | 2.616296  |
| H  | 0.948092  | -1.155132 | 3.568823  |
| H  | 1.656431  | -0.853606 | 1.963710  |
| C  | -1.620448 | -1.672033 | 2.800975  |
| H  | -2.012732 | -0.660059 | 2.912361  |
| H  | -2.418558 | -2.301411 | 2.404055  |
| H  | -1.381241 | -2.037861 | 3.807376  |
| C  | 0.237954  | -3.140460 | 1.995005  |
| H  | -0.477692 | -3.912615 | 1.710638  |
| H  | 1.125395  | -3.228936 | 1.361907  |
| H  | 0.542674  | -3.346284 | 3.027811  |
| Pd | 1.498802  | -0.682333 | -0.798858 |
| C  | -1.698798 | 0.345314  | 0.009539  |
| C  | -1.193695 | 1.378442  | 1.050398  |
| C  | -3.209880 | 0.115027  | 0.241046  |
| C  | -1.495395 | 1.006022  | -1.384779 |
| H  | -1.321451 | 0.994228  | 2.063507  |
| H  | -0.125097 | 1.557892  | 0.895479  |
| C  | -1.969549 | 2.705075  | 0.947469  |
| H  | -3.384945 | -0.331374 | 1.224115  |
| H  | -3.610660 | -0.580632 | -0.500660 |
| C  | -3.982632 | 1.447384  | 0.135487  |
| H  | -0.424558 | 1.188422  | -1.529587 |
| H  | -1.809606 | 0.337717  | -2.185493 |
| C  | -2.286068 | 2.322699  | -1.497253 |
| H  | -1.584120 | 3.390456  | 1.712144  |
| C  | -3.464120 | 2.436154  | 1.193747  |
| C  | -1.775434 | 3.319055  | -0.446411 |
| H  | -5.048377 | 1.249040  | 0.304688  |
| C  | -3.782743 | 2.046643  | -1.267623 |
| H  | -2.137149 | 2.733859  | -2.503416 |
| H  | -4.031851 | 3.373884  | 1.143645  |
| H  | -3.612830 | 2.022970  | 2.199984  |
| H  | -0.714189 | 3.535163  | -0.615580 |
| H  | -2.320126 | 4.269019  | -0.522340 |
| H  | -4.160105 | 1.352663  | -2.030005 |
| H  | -4.358111 | 2.975974  | -1.365412 |
| C  | 3.020908  | 1.810569  | 0.124973  |
| C  | 3.817825  | 1.238750  | 1.105644  |
| C  | 4.444967  | 0.010406  | 0.843596  |
| C  | 4.301976  | -0.609529 | -0.393734 |
| C  | 3.532742  | 0.000257  | -1.414916 |
| C  | 2.852228  | 1.215142  | -1.140392 |
| H  | 3.578397  | -0.376493 | -2.433364 |
| H  | 2.341969  | 1.759106  | -1.926082 |
| H  | 5.051622  | -0.451683 | 1.615871  |
| H  | 4.813913  | -1.543637 | -0.599810 |
| H  | 3.935980  | 1.730688  | 2.064078  |
| Cl | 2.197436  | 3.330530  | 0.453278  |

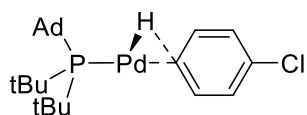

**Pd-H-TS**

65

**Pd-H-TS**

|    |               |               |               |
|----|---------------|---------------|---------------|
| Pd | -1.0993756209 | -0.2935143054 | -0.1158158061 |
| P  | 1.1627196404  | -0.9600547194 | 0.0329523457  |
| C  | 1.2924697740  | -1.8262967119 | 1.7369335329  |
| C  | 1.6061333938  | -2.2165977674 | -1.3369710510 |
| C  | 2.4985062415  | -2.7434330229 | 1.9371206703  |
| C  | 1.2819657009  | -0.7745127139 | 2.8521790715  |
| C  | -0.0106713798 | -2.6218684569 | 1.9197521256  |
| C  | 1.0497510162  | -1.6720690517 | -2.6626222576 |
| C  | 3.0961549188  | -2.5287630361 | -1.4844559654 |
| C  | 0.8442785651  | -3.5214553760 | -1.0811123098 |
| C  | 2.3714516725  | 0.5072327217  | -0.0249565801 |
| C  | 2.5368980959  | 0.9781213713  | -1.4844032759 |
| C  | 3.7681666195  | 0.2469223553  | 0.5643546249  |
| C  | 1.7072348918  | 1.6811408117  | 0.7328594275  |
| C  | 3.4023681234  | 2.2405598315  | -1.5642420726 |
| C  | 4.6248116602  | 1.5175771520  | 0.4864785463  |
| C  | 2.5779347377  | 2.9391499099  | 0.6688618773  |
| C  | 4.7826424637  | 1.9435396829  | -0.9737690767 |
| C  | 2.7415115537  | 3.3755377262  | -0.7851692340 |
| C  | 3.9508161924  | 2.6413138929  | 1.2769338607  |
| H  | 2.4731116095  | -3.1602190176 | 2.9580403922  |
| H  | 2.5024262183  | -3.5923183924 | 1.2419890388  |
| H  | 3.4505437522  | -2.2080907077 | 1.8235894165  |
| H  | 0.4273241279  | -0.0880568856 | 2.7566349528  |
| H  | 1.1808658988  | -1.2958193224 | 3.8181395135  |
| H  | 2.2037435274  | -0.1823087170 | 2.8980996444  |
| H  | -0.0406186197 | -3.0353439176 | 2.9415915852  |
| H  | -0.8977767118 | -1.9704572025 | 1.8128664940  |
| H  | -0.1230684880 | -3.4565736508 | 1.2212972887  |
| H  | 1.5482008815  | -0.7595859369 | -3.0037012276 |
| H  | 1.1871104232  | -2.4386101371 | -3.4431747118 |
| H  | -0.0247455878 | -1.4530998554 | -2.5738604755 |
| H  | 3.6803212069  | -1.6508018483 | -1.7897931143 |
| H  | 3.5377055027  | -2.9245844836 | -0.5606143024 |
| H  | 3.2289565662  | -3.2931137154 | -2.2683056598 |
| H  | 1.2195978420  | -4.0821902104 | -0.2159797496 |
| H  | -0.2330738775 | -3.3390379100 | -0.9488955592 |
| H  | 0.9624608713  | -4.1704220868 | -1.9638731143 |
| H  | 3.0168075684  | 0.1980532945  | -2.0907277127 |
| H  | 1.5423764205  | 1.1708436298  | -1.9193852937 |
| H  | 4.2688530610  | -0.5701786798 | 0.0238568715  |
| H  | 3.6926108285  | -0.0673086547 | 1.6151081826  |
| H  | 0.7157359406  | 1.8724487218  | 0.2904028573  |
| H  | 1.5342295455  | 1.4250797364  | 1.7837354725  |

|    |               |               |               |
|----|---------------|---------------|---------------|
| H  | 3.5045210552  | 2.5242649943  | -2.6247827706 |
| H  | 5.6154842854  | 1.3009749249  | 0.9196400013  |
| H  | 2.0811245582  | 3.7370129329  | 1.2450635416  |
| H  | 5.4264309120  | 2.8364921603  | -1.0426723424 |
| H  | 5.2802088670  | 1.1449663728  | -1.5504746725 |
| H  | 1.7578248690  | 3.6147059486  | -1.2221381549 |
| H  | 3.3546651392  | 4.2905314144  | -0.8479691367 |
| H  | 3.8421472303  | 2.3483770619  | 2.3353745237  |
| H  | 4.5805390966  | 3.5468097879  | 1.2596387825  |
| C  | -3.0066083046 | 0.2909624138  | -0.2269963021 |
| C  | -3.9538740116 | -0.4598634454 | -0.9442907437 |
| C  | -3.4882862731 | 1.3189333410  | 0.6019650746  |
| C  | -5.3235050040 | -0.2419920516 | -0.7984070419 |
| C  | -4.8537710563 | 1.5524136799  | 0.7611358566  |
| C  | -5.7614308484 | 0.7630837688  | 0.0598965913  |
| Cl | -7.4712590119 | 1.0479428354  | 0.2477288082  |
| H  | -2.7840533921 | 1.9537369262  | 1.1468633494  |
| H  | -5.2167385767 | 2.3444931300  | 1.4188853355  |
| H  | -1.3815783432 | 0.7338954308  | -1.2122115707 |
| H  | -3.6214802077 | -1.2427896215 | -1.6314818701 |
| H  | -6.0506857014 | -0.8414294997 | -1.3494729319 |

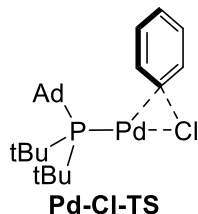

65

**Pd-CI-TS**

|    |               |               |               |
|----|---------------|---------------|---------------|
| Pd | -1.7581152269 | 0.7883025392  | -0.6802556199 |
| P  | 0.4085517025  | 1.4312572890  | -0.2251936955 |
| C  | 1.1132016587  | 2.4197956493  | -1.7115488610 |
| C  | 0.4143830649  | 2.5765624331  | 1.3146291264  |
| C  | 2.3485435018  | 3.2721749339  | -1.4169549401 |
| C  | 1.4373955026  | 1.4459977473  | -2.8495663106 |
| C  | -0.0105085879 | 3.3179320446  | -2.2519318479 |
| C  | -0.5619230361 | 1.9834355256  | 2.3413548169  |
| C  | 1.7811344900  | 2.8025217054  | 1.9640911198  |
| C  | -0.1826053397 | 3.9353771983  | 0.9333818449  |
| C  | 1.5467822864  | -0.0623854609 | 0.1156462076  |
| C  | 1.2143062712  | -0.6478833968 | 1.5044717546  |
| C  | 3.0578600166  | 0.2228338358  | 0.0500476314  |
| C  | 1.2016145426  | -1.1695351737 | -0.9067592768 |
| C  | 2.0296867055  | -1.9165626664 | 1.7793715488  |
| C  | 3.8607797578  | -1.0551151033 | 0.3237705042  |
| C  | 2.0223984345  | -2.4367454393 | -0.6455926935 |
| C  | 3.5217812731  | -1.5861711463 | 1.7175448300  |
| C  | 1.6959073957  | -2.9849595848 | 0.7416541287  |
| C  | 3.5148158609  | -2.1100554737 | -0.7292132024 |
| H  | 2.6863081055  | 3.7505340274  | -2.3515953116 |

|    |               |               |               |
|----|---------------|---------------|---------------|
| H  | 2.1398183732  | 4.0779357815  | -0.7019870566 |
| H  | 3.1877914157  | 2.6819902344  | -1.0278570714 |
| H  | 0.5821225185  | 0.7888785220  | -3.0683727404 |
| H  | 1.6501379959  | 2.0319872948  | -3.7585535629 |
| H  | 2.3188799514  | 0.8244840160  | -2.6493254308 |
| H  | 0.3387572063  | 3.8005929831  | -3.1800276211 |
| H  | -0.9068466064 | 2.7231006211  | -2.4896317583 |
| H  | -0.3090597771 | 4.1109863182  | -1.5593217906 |
| H  | -0.2805849566 | 0.9884358259  | 2.6991223833  |
| H  | -0.6095438543 | 2.6567543291  | 3.2136631645  |
| H  | -1.5687975742 | 1.9052237539  | 1.9061159778  |
| H  | 2.2037457387  | 1.8817163017  | 2.3853492049  |
| H  | 2.5145816497  | 3.2239248678  | 1.2649288767  |
| H  | 1.6693446852  | 3.5174410063  | 2.7965296512  |
| H  | 0.4769213601  | 4.5358661143  | 0.2948256623  |
| H  | -1.1545600446 | 3.8175136536  | 0.4309435285  |
| H  | -0.3522462948 | 4.5108757615  | 1.8580607617  |
| H  | 1.4417949719  | 0.0790509206  | 2.2951585870  |
| H  | 0.1369427522  | -0.8742278266 | 1.5610564320  |
| H  | 3.3412785142  | 0.9967892345  | 0.7778706481  |
| H  | 3.3354010303  | 0.6026783844  | -0.9436372977 |
| H  | 0.1253373216  | -1.3897923330 | -0.8374364532 |
| H  | 1.3894348133  | -0.8328947418 | -1.9321857491 |
| H  | 1.7693203276  | -2.2815199911 | 2.7869076370  |
| H  | 4.9353562146  | -0.8129743284 | 0.2688189017  |
| H  | 1.7611346771  | -3.1838497190 | -1.4136445694 |
| H  | 4.1211908776  | -2.4852037271 | 1.9399642866  |
| H  | 3.7784821621  | -0.8328800531 | 2.4824235116  |
| H  | 0.6284610308  | -3.2453260715 | 0.8042274184  |
| H  | 2.2726838687  | -3.9048549275 | 0.9392808667  |
| H  | 3.7678276888  | -1.7359068204 | -1.7362317498 |
| H  | 4.1149624844  | -3.0213619940 | -0.5661629891 |
| C  | -2.0419170224 | -3.1637334471 | 0.3313610834  |
| C  | -2.0831835150 | -3.0585061350 | 1.7232109852  |
| C  | -2.5322690586 | -1.8711678592 | 2.3064863907  |
| C  | -2.9283555569 | -0.7940796157 | 1.5205138440  |
| C  | -2.8094013680 | -0.8868986724 | 0.1229505099  |
| C  | -2.4200141440 | -2.0968894463 | -0.4776481981 |
| H  | -1.7167632930 | -4.0955393188 | -0.1386286696 |
| H  | -1.7888847395 | -3.9033578972 | 2.3489710306  |
| H  | -2.5907581663 | -1.7834771493 | 3.3944373749  |
| H  | -3.3112329244 | 0.1215565724  | 1.9724836763  |
| Cl | -4.0374921537 | 0.1851032054  | -0.9210280296 |
| H  | -2.4099759601 | -2.1827061115 | -1.5651264112 |

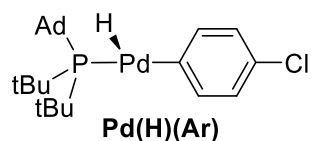

65  
**Pd(H)(Ar)**

|   |               |               |               |
|---|---------------|---------------|---------------|
| P | -1.1668090118 | -0.9460551265 | -0.0228253396 |
| C | -1.2780992096 | -1.8104938472 | -1.7287012077 |
| C | -1.6062017212 | -2.2073323846 | 1.3430138969  |
| C | -2.4686461937 | -2.7460511512 | -1.9343775900 |
| H | -2.4337140213 | -3.1609873496 | -2.9557608554 |
| H | -2.4626965254 | -3.5954345404 | -1.2400475432 |
| H | -3.4285507305 | -2.2243255406 | -1.8233969390 |
| C | -1.2785676609 | -0.7607134627 | -2.8458444973 |
| H | -0.4347132782 | -0.0613098920 | -2.7493977634 |
| H | -1.1660237631 | -1.2827819559 | -3.8101530584 |
| H | -2.2089544497 | -0.1825864066 | -2.8969397033 |
| C | 0.0397938720  | -2.5841015849 | -1.9024685612 |
| H | 0.0787015525  | -3.0095262742 | -2.9191015264 |
| H | 0.9157362559  | -1.9138640112 | -1.8103296738 |
| H | 0.1705220158  | -3.4069770809 | -1.1932924471 |
| C | -1.0606661957 | -1.6600462554 | 2.6720265309  |
| H | -1.5642135585 | -0.7491738898 | 3.0097382135  |
| H | -1.2008262373 | -2.4268160671 | 3.4517705555  |
| H | 0.0136496706  | -1.4385734497 | 2.5908461502  |
| C | -3.0947759482 | -2.5299864814 | 1.4822440307  |
| H | -3.6862952744 | -1.6559214565 | 1.7847342228  |
| H | -3.5287899990 | -2.9286450331 | 0.5560213605  |
| H | -3.2263151769 | -3.2953353880 | 2.2652897030  |
| C | -0.8322805535 | -3.5058724724 | 1.0908579702  |
| H | -1.1933602705 | -4.0670907370 | 0.2200750624  |
| H | 0.2450969935  | -3.3149752543 | 0.9716417706  |
| H | -0.9549882737 | -4.1583294249 | 1.9703854199  |
| C | -2.3821119628 | 0.5141508594  | 0.0305528557  |
| C | -2.5550401483 | 0.9854311452  | 1.4890170950  |
| C | -3.7762159641 | 0.2449220293  | -0.5619864786 |
| C | -1.7225496794 | 1.6901546323  | -0.7281786490 |
| H | -3.0330371121 | 0.2030967049  | 2.0940558985  |
| H | -1.5637002797 | 1.1845681380  | 1.9280578857  |
| C | -3.4271690676 | 2.2434306066  | 1.5647228380  |
| H | -4.2740440022 | -0.5737260991 | -0.0211705203 |
| H | -3.6965717207 | -0.0708606453 | -1.6120333315 |
| C | -4.6396674745 | 1.5112748108  | -0.4883262378 |
| H | -0.7321192918 | 1.8873727559  | -0.2867048853 |
| H | -1.5485568350 | 1.4334244941  | -1.7786423607 |
| C | -2.5999206980 | 2.9436904727  | -0.6669960388 |
| H | -3.5336491202 | 2.5278377852  | 2.6246262725  |
| C | -4.8041474994 | 1.9384907207  | 0.9708090468  |
| C | -2.7695441552 | 3.3806589128  | 0.7861578406  |
| H | -5.6278705819 | 1.2886814837  | -0.9240507841 |
| C | -3.9695789490 | 2.6377000993  | -1.2782683005 |
| H | -2.1058794394 | 3.7435503091  | -1.2427254560 |
| H | -5.4526926762 | 2.8282131356  | 1.0364585236  |
| H | -5.2993469140 | 1.1382935936  | 1.5473014272  |
| H | -1.7882647442 | 3.6250876929  | 1.2255976193  |
| H | -3.3871788406 | 4.2927665831  | 0.8463887303  |
| H | -3.8566797833 | 2.3443651140  | -2.3361476706 |
| H | -4.6042980505 | 3.5397304972  | -1.2635618865 |

|    |              |               |               |
|----|--------------|---------------|---------------|
| Pd | 1.0985541926 | -0.2982358401 | 0.1083118701  |
| C  | 3.0213555659 | 0.2447656645  | 0.1825914049  |
| C  | 3.9658110260 | -0.5125734934 | 0.8976284453  |
| C  | 3.5127296847 | 1.2822212466  | -0.6294349336 |
| C  | 5.3367931255 | -0.2856567402 | 0.7752418219  |
| C  | 4.8792386396 | 1.5265247764  | -0.7661663290 |
| H  | 2.8154776021 | 1.9208320473  | -1.1795699836 |
| C  | 5.7813915343 | 0.7337376498  | -0.0621294178 |
| H  | 5.2470596027 | 2.3287993558  | -1.4088724836 |
| H  | 1.1393729445 | 0.7146150445  | 1.2387904183  |
| H  | 3.6318817676 | -1.3092987225 | 1.5687069682  |
| Cl | 7.4929863827 | 1.0301869675  | -0.2221396694 |
| H  | 6.0595288134 | -0.8892526191 | 1.3278151013  |

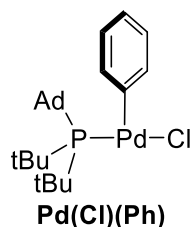

65

**Pd(Cl)(Ph)**

|   |               |               |               |
|---|---------------|---------------|---------------|
| P | 0.0327013457  | 1.1515446064  | -0.1564711810 |
| C | 0.2481073655  | 2.5417536509  | 1.1481624947  |
| C | 0.1060136962  | 1.9387670164  | -1.9006739471 |
| C | -0.5286645509 | 3.8288943958  | 0.8729374088  |
| H | -0.3535994740 | 4.5346249559  | 1.7019855373  |
| H | -0.2101599356 | 4.3302185570  | -0.0492270517 |
| H | -1.6108479296 | 3.6553988097  | 0.8111734212  |
| C | -0.1412540407 | 2.0170933272  | 2.5343389471  |
| H | 0.3832106602  | 1.0809855323  | 2.7764863492  |
| H | 0.1592047474  | 2.7684255906  | 3.2824474191  |
| H | -1.2208608823 | 1.8593992724  | 2.6465147298  |
| C | 1.7561668058  | 2.8396716398  | 1.2271815458  |
| H | 1.9339986016  | 3.5759999978  | 2.0284747961  |
| H | 2.3413184768  | 1.9435161762  | 1.5187659764  |
| H | 2.1816426801  | 3.2475382237  | 0.3062889631  |
| C | 0.4545840399  | 0.8352389247  | -2.9079319655 |
| H | -0.2720474722 | 0.0175029268  | -2.9421219498 |
| H | 0.5052259936  | 1.2831022948  | -3.9137958269 |
| H | 1.4413205746  | 0.4098210813  | -2.6775786003 |
| C | -1.1739730065 | 2.6565504453  | -2.3326596505 |
| H | -2.0207373818 | 1.9698846067  | -2.4548991190 |
| H | -1.4737039438 | 3.4457186313  | -1.6317330022 |
| H | -0.9994577353 | 3.1323885093  | -3.3116412374 |
| C | 1.2773189315  | 2.9255818396  | -1.9715954669 |
| H | 1.1214323418  | 3.8326280111  | -1.3764833383 |
| H | 2.2229866287  | 2.4537592030  | -1.6651450260 |
| H | 1.3951929999  | 3.2409162314  | -3.0206392484 |
| C | -1.6366344214 | 0.2795650765  | 0.0897722709  |
| C | -1.9362609398 | -0.5956844323 | -1.1460898919 |

|    |               |               |               |
|----|---------------|---------------|---------------|
| C  | -2.8295288092 | 1.2249666239  | 0.3248152530  |
| C  | -1.5175537024 | -0.6748475825 | 1.2986486747  |
| H  | -2.0552547052 | 0.0294320115  | -2.0412249115 |
| H  | -1.0960163319 | -1.2828781308 | -1.3271271196 |
| C  | -3.2262583922 | -1.3977186232 | -0.9496835165 |
| H  | -2.9525162778 | 1.9183670803  | -0.5190347753 |
| H  | -2.6609956674 | 1.8382544738  | 1.2217826008  |
| C  | -4.1197557703 | 0.4136212510  | 0.5145137552  |
| H  | -0.6813677498 | -1.3654666875 | 1.1361179469  |
| H  | -1.3009043640 | -0.1201288563 | 2.2174057434  |
| C  | -2.8115051877 | -1.4699695864 | 1.4953960631  |
| H  | -3.4016890474 | -1.9948925446 | -1.8595612978 |
| C  | -4.3907862213 | -0.4309051578 | -0.7319192724 |
| C  | -3.0788093353 | -2.3227407195 | 0.2566275474  |
| H  | -4.9527484185 | 1.1178548920  | 0.6760831957  |
| C  | -3.9755260696 | -0.5058692339 | 1.7285973133  |
| H  | -2.6838821004 | -2.1213252311 | 2.3755259939  |
| H  | -5.3346817169 | -0.9887762533 | -0.6126074747 |
| H  | -4.5144213538 | 0.2208189692  | -1.6140743266 |
| H  | -2.2450546968 | -3.0260818048 | 0.0947847396  |
| H  | -3.9941284897 | -2.9233738436 | 0.3921185926  |
| H  | -3.7974886489 | 0.0919431324  | 2.6389742643  |
| H  | -4.9113566518 | -1.0663833647 | 1.8920363869  |
| Pd | 2.0036288991  | 0.0381496415  | 0.2429361883  |
| Cl | 4.1509323838  | -0.6123481378 | 0.7707417471  |
| C  | 1.4394849800  | -1.7888001933 | -0.1666721301 |
| C  | 1.2726225118  | -2.6557027223 | 0.9186427473  |
| C  | 1.2676341278  | -2.2679258861 | -1.4648001111 |
| C  | 0.8715409664  | -3.9744946529 | 0.7026381958  |
| H  | 1.4597035952  | -2.3068836974 | 1.9360224095  |
| C  | 0.8705907706  | -3.5923010675 | -1.6722174207 |
| H  | 1.4402377680  | -1.6238464811 | -2.3260141894 |
| C  | 0.6559190761  | -4.4451867955 | -0.5924051314 |
| H  | 0.7378844792  | -4.6405380545 | 1.5591048019  |
| H  | 0.7333595063  | -3.9549033719 | -2.6944645605 |
| H  | 0.3430649056  | -5.4785003409 | -0.7590697356 |

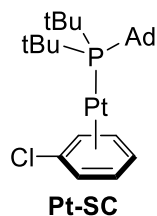

65

**Pt-SC**

|   |               |              |               |
|---|---------------|--------------|---------------|
| P | -0.6300453193 | 1.1291538827 | -0.2443132354 |
| C | -1.2247976704 | 2.6963274317 | 0.6834368888  |
| C | -0.4364557007 | 1.5492250554 | -2.1069394892 |
| C | -2.3286005367 | 3.4954916842 | -0.0110047577 |
| H | -2.6251884195 | 4.3367015554 | 0.6377574758  |
| H | -1.9985511114 | 3.9275900209 | -0.9647400380 |

|    |               |               |               |
|----|---------------|---------------|---------------|
| H  | -3.2283124915 | 2.8961434438  | -0.2018597264 |
| C  | -1.7045169973 | 2.2907926675  | 2.0814122888  |
| H  | -0.9456730583 | 1.6881066307  | 2.6022099791  |
| H  | -1.8705995838 | 3.2071054274  | 2.6711587698  |
| H  | -2.6505442344 | 1.7357817089  | 2.0688305107  |
| C  | 0.0000070019  | 3.5944000954  | 0.9136531606  |
| H  | -0.2916223351 | 4.4297700319  | 1.5720471333  |
| H  | 0.8064409897  | 3.0264277632  | 1.4046146448  |
| H  | 0.4052308619  | 4.0244096425  | -0.0076433379 |
| C  | 0.4680844276  | 0.4843552604  | -2.7484404357 |
| H  | 0.0145998090  | -0.5108459191 | -2.7950252744 |
| H  | 0.6956329759  | 0.7966945312  | -3.7814546975 |
| H  | 1.4117201228  | 0.3925801876  | -2.1882340953 |
| C  | -1.7446376516 | 1.6626510793  | -2.8898867554 |
| H  | -2.2836519928 | 0.7081413955  | -2.9443366108 |
| H  | -2.4259224131 | 2.4132344328  | -2.4694372294 |
| H  | -1.5179258334 | 1.9650211750  | -3.9258941158 |
| C  | 0.3388352970  | 2.8651155367  | -2.2317967188 |
| H  | -0.2416045738 | 3.7418807984  | -1.9194817427 |
| H  | 1.2748475389  | 2.8306442432  | -1.6540115193 |
| H  | 0.6058246373  | 3.0117429741  | -3.2910351319 |
| Pt | 1.3516633895  | 0.3961277880  | 0.5671785284  |
| C  | -1.9337402128 | -0.2531925010 | -0.0496877180 |
| C  | -1.6272832400 | -1.3639402981 | -1.0753679157 |
| C  | -3.4010453319 | 0.1786539206  | -0.2142411754 |
| C  | -1.7517825479 | -0.8946594398 | 1.3459345460  |
| H  | -1.7497195957 | -0.9874389442 | -2.0990453433 |
| H  | -0.5783568744 | -1.6831773962 | -0.9612472545 |
| C  | -2.5661389443 | -2.5609151106 | -0.8954558986 |
| H  | -3.5662072151 | 0.6255518793  | -1.2056383036 |
| H  | -3.6638548362 | 0.9460958190  | 0.5283568384  |
| C  | -4.3341009055 | -1.0270187979 | -0.0305791026 |
| H  | -0.7013108664 | -1.2129972699 | 1.4482932333  |
| H  | -1.9332132972 | -0.1648060811 | 2.1426461760  |
| C  | -2.6994565674 | -2.0827205348 | 1.5340448937  |
| H  | -2.3170245850 | -3.3142702787 | -1.6611241273 |
| C  | -4.0123383467 | -2.0961673733 | -1.0765323104 |
| C  | -2.3831768053 | -3.1585541917 | 0.4976774176  |
| H  | -5.3757838690 | -0.6868181537 | -0.1551935274 |
| C  | -4.1465955972 | -1.6130252198 | 1.3702075833  |
| H  | -2.5530133340 | -2.4871503726 | 2.5494350688  |
| H  | -4.7042218516 | -2.9490938014 | -0.9722412419 |
| H  | -4.1565128831 | -1.6889849620 | -2.0921866129 |
| H  | -1.3464113480 | -3.5127301046 | 0.6224318641  |
| H  | -3.0451426284 | -4.0312133283 | 0.6310702194  |
| H  | -4.3887063116 | -0.8547164139 | 2.1346784430  |
| H  | -4.8417119867 | -2.4558380604 | 1.5241862897  |
| C  | 2.7800986042  | -2.0483624167 | -0.2212085173 |
| C  | 3.7179256640  | -1.5959628824 | -1.1220663319 |
| C  | 4.4408251512  | -0.4166518397 | -0.8368525612 |
| C  | 4.2384691092  | 0.2633790011  | 0.3473135670  |
| C  | 3.3026124759  | -0.2141782719 | 1.3100282508  |

|    |              |               |               |
|----|--------------|---------------|---------------|
| C  | 2.5228992498 | -1.3716304252 | 1.0076786291  |
| H  | 3.3465012365 | 0.1615864086  | 2.3361114874  |
| H  | 1.9839397771 | -1.9082177009 | 1.7922426858  |
| H  | 5.1695487301 | -0.0500761367 | -1.5628653603 |
| H  | 4.8234186677 | 1.1571435386  | 0.5751497473  |
| H  | 3.8868451936 | -2.1435338710 | -2.0504415583 |
| Cl | 1.8694475926 | -3.4904943468 | -0.5620583033 |

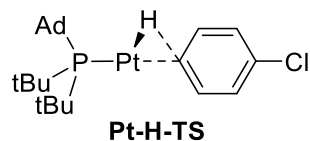

65

**Pt-H-TS**

|    |               |               |               |
|----|---------------|---------------|---------------|
| Pt | 0.9493503452  | -0.1796403380 | 0.2405791997  |
| Cl | 7.3560687253  | 1.0043616925  | -0.3050816482 |
| P  | -1.2294052855 | -0.9330656162 | -0.1102787233 |
| C  | -1.2506644127 | -1.7145965726 | -1.8589211048 |
| C  | -1.6970079330 | -2.2657579100 | 1.1798346598  |
| C  | -2.4253682962 | -2.6470153904 | -2.1523695507 |
| C  | -1.2205074914 | -0.6040815398 | -2.9150386434 |
| C  | 0.0770747864  | -2.4716206970 | -2.0277125789 |
| C  | -1.2265509386 | -1.7755472641 | 2.5586130558  |
| C  | -3.1815374717 | -2.6301202799 | 1.2352222159  |
| C  | -0.8775737834 | -3.5282745364 | 0.8923319520  |
| C  | -2.4784897127 | 0.5008385718  | -0.0367794632 |
| C  | -2.7152196386 | 0.8875572657  | 1.4374099488  |
| C  | -3.8423143690 | 0.2284634377  | -0.6939643464 |
| C  | -1.8256051711 | 1.7315546719  | -0.7086407322 |
| C  | -3.6210519908 | 2.1185318398  | 1.5475978526  |
| C  | -4.7422225052 | 1.4668264018  | -0.5827482469 |
| C  | -2.7382415793 | 2.9573098760  | -0.6142017917 |
| C  | -4.9682258932 | 1.8109275816  | 0.8903055847  |
| C  | -2.9686013200 | 3.3117051427  | 0.8529083476  |
| C  | -4.0776047031 | 2.6506628394  | -1.2885212749 |
| C  | 2.8978926271  | 0.3865957664  | 0.3501392490  |
| C  | 3.8488311187  | -0.4164170454 | 1.0075567304  |
| C  | 3.3773492042  | 1.4303398813  | -0.4638956426 |
| C  | 5.2150517833  | -0.2411806117 | 0.8028267877  |
| C  | 4.7400316670  | 1.6184379503  | -0.6789011531 |
| C  | 5.6497460551  | 0.7746396771  | -0.0454696345 |
| H  | -2.3489729224 | -3.0050711845 | -3.1926408269 |
| H  | -2.4304564179 | -3.5342131967 | -1.5065890761 |
| H  | -3.3960453932 | -2.1444371797 | -2.0477182955 |
| H  | -0.3937328019 | 0.0990645531  | -2.7362572930 |
| H  | -1.0542584081 | -1.0702363906 | -3.8998151994 |
| H  | -2.1580946860 | -0.0387368338 | -2.9775852142 |
| H  | 0.1523624934  | -2.8302009547 | -3.0677673928 |
| H  | 0.9391377948  | -1.8064672433 | -1.8419171344 |
| H  | 0.1779135323  | -3.3397475480 | -1.3692839717 |
| H  | -1.8041495834 | -0.9286575524 | 2.9420137982  |

|   |               |               |               |
|---|---------------|---------------|---------------|
| H | -1.3319001432 | -2.6034115424 | 3.2791176739  |
| H | -0.1694203853 | -1.4718091048 | 2.5207028349  |
| H | -3.8097020084 | -1.7859493287 | 1.5489805781  |
| H | -3.5638193194 | -2.9994265578 | 0.2747532207  |
| H | -3.3252945045 | -3.4328079531 | 1.9775407743  |
| H | -1.1895923457 | -4.0480277285 | -0.0217627460 |
| H | 0.1964193313  | -3.2979087546 | 0.8249062821  |
| H | -1.0161504448 | -4.2306819227 | 1.7300299071  |
| H | -3.1957242925 | 0.0624602743  | 1.9797189159  |
| H | -1.7442167027 | 1.0816915218  | 1.9217645235  |
| H | -4.3374130451 | -0.6309713327 | -0.2176038091 |
| H | -3.7166403903 | -0.0254015152 | -1.7562143633 |
| H | -0.8563500446 | 1.9250132975  | -0.2198868853 |
| H | -1.6060580103 | 1.5349873607  | -1.7637564363 |
| H | -3.7713776034 | 2.3437986806  | 2.6164353184  |
| H | -5.7085815154 | 1.2420991114  | -1.0641095399 |
| H | -2.2461858139 | 3.7986625141  | -1.1294174256 |
| H | -5.6432981948 | 2.6787084395  | 0.9791981590  |
| H | -5.4601047847 | 0.9681152712  | 1.4056739494  |
| H | -2.0092974697 | 3.5559916493  | 1.3384647202  |
| H | -3.6119446965 | 4.2037988211  | 0.9399301376  |
| H | -3.9208489334 | 2.4169913108  | -2.3555772507 |
| H | -4.7373016079 | 3.5339020738  | -1.2485226236 |
| H | 2.6661973420  | 2.1006033315  | -0.9524100644 |
| H | 5.1008871883  | 2.4174561031  | -1.3290321096 |
| H | 1.6307213903  | 0.7952501019  | 1.2668090847  |
| H | 3.5119526180  | -1.2061635959 | 1.6830577508  |
| H | 5.9441254546  | -0.8830513374 | 1.3005732836  |

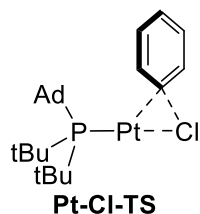

65

**Pt-Cl-TS**

|    |               |               |               |
|----|---------------|---------------|---------------|
| Pt | 1.4559018177  | -0.6972117829 | -0.3796869714 |
| Cl | 3.7355762610  | -0.0602403595 | -0.8024464983 |
| P  | -0.6286766047 | -1.1835358335 | 0.1627546873  |
| C  | -1.3112703649 | -2.6099928416 | -0.9304555314 |
| C  | -0.6958995697 | -1.7433358175 | 1.9989211608  |
| C  | -2.5734970428 | -3.2941390162 | -0.4024238504 |
| C  | -1.5839734126 | -2.0652888236 | -2.3366875581 |
| C  | -0.1992753487 | -3.6553368926 | -1.1041115769 |
| C  | 0.2571044981  | -0.8492039988 | 2.8062277434  |
| C  | -2.0853387620 | -1.7312826624 | 2.6407199874  |
| C  | -0.1121912077 | -3.1562191502 | 2.1096171941  |
| C  | -1.7529654827 | 0.3474991154  | -0.0518847759 |
| C  | -1.4498994021 | 1.3521704065  | 1.0790934075  |
| C  | -3.2643312679 | 0.0607967537  | -0.0653328200 |

|   |               |               |               |
|---|---------------|---------------|---------------|
| C | -1.3682928708 | 1.0562142799  | -1.3707240496 |
| C | -2.2530660478 | 2.6453996587  | 0.9026742691  |
| C | -4.0572658787 | 1.3622330262  | -0.2429830638 |
| C | -2.1784726685 | 2.3435256290  | -1.5593494127 |
| C | -3.7472302847 | 2.3180491899  | 0.9102750731  |
| C | -1.8798932408 | 3.3130228099  | -0.4182487056 |
| C | -3.6726129698 | 2.0144662326  | -1.5724836416 |
| C | 1.8519560708  | 3.4969249169  | -0.3985087920 |
| C | 1.8622414570  | 3.7054513280  | 0.9818326073  |
| C | 2.3665338974  | 2.7114038946  | 1.8240037651  |
| C | 2.8465487345  | 1.5138942843  | 1.3056937836  |
| C | 2.7530447899  | 1.2926901539  | -0.0762269833 |
| C | 2.3111394044  | 2.3021164699  | -0.9432230331 |
| H | -2.8968628386 | -4.0555697263 | -1.1318372968 |
| H | -2.4016288093 | -3.8154191341 | 0.5480226610  |
| H | -3.4110590930 | -2.5990706948 | -0.2622178645 |
| H | -0.7064739553 | -1.5308904038 | -2.7306192100 |
| H | -1.7880279750 | -2.9171703784 | -3.0056850055 |
| H | -2.4549377530 | -1.3998359260 | -2.3811375328 |
| H | -0.5394055975 | -4.4087378949 | -1.8343226577 |
| H | 0.7189686380  | -3.1815979266 | -1.4837341775 |
| H | 0.0546462250  | -4.1807228804 | -0.1781804763 |
| H | -0.0224485557 | 0.2091848666  | 2.8114111332  |
| H | 0.2694374866  | -1.2029620964 | 3.8510501761  |
| H | 1.2741052475  | -0.9191928000 | 2.3939065825  |
| H | -2.5027191088 | -0.7198875882 | 2.7273981935  |
| H | -2.8090357479 | -2.3517939708 | 2.0974271390  |
| H | -2.0076668130 | -2.1367593545 | 3.6634437292  |
| H | -0.7644835640 | -3.9294259765 | 1.6854919127  |
| H | 0.8738483801  | -3.2154526167 | 1.6254990912  |
| H | 0.0212785154  | -3.3928513278 | 3.1779097949  |
| H | -1.7094446340 | 0.9241428714  | 2.0557762988  |
| H | -0.3697191578 | 1.5720983136  | 1.0906228550  |
| H | -3.5776281942 | -0.4350729506 | 0.8644679209  |
| H | -3.5174792875 | -0.6196817055 | -0.8904751984 |
| H | -0.2887594414 | 1.2728201078  | -1.3477295559 |
| H | -1.5359669595 | 0.4016516898  | -2.2331568243 |
| H | -2.0131318932 | 3.3191215287  | 1.7422156443  |
| H | -5.1331433170 | 1.1195222685  | -0.2455515356 |
| H | -1.8892338758 | 2.7982850290  | -2.5215829317 |
| H | -4.3417026573 | 3.2419615177  | 0.8097800023  |
| H | -4.0319445549 | 1.8559979419  | 1.8713413525  |
| H | -0.8109770672 | 3.5748130383  | -0.4143685833 |
| H | -2.4484482596 | 4.2500402017  | -0.5485602985 |
| H | -3.9054069435 | 1.3328343493  | -2.4086150217 |
| H | -4.2649017700 | 2.9316516126  | -1.7319339548 |
| H | 2.3990878670  | 2.8725561388  | 2.9042587494  |
| H | 3.2595354435  | 0.7397348414  | 1.9527297635  |
| H | 1.4980541522  | 4.6466038225  | 1.3983686479  |
| H | 1.4876028270  | 4.2792142935  | -1.0687397415 |
| H | 2.3108429084  | 2.1300368368  | -2.0199868817 |

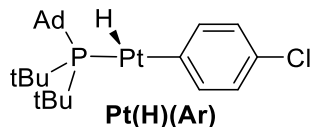

65

**Pt(H)(Ar)**

|   |               |               |               |
|---|---------------|---------------|---------------|
| P | -1.2683532894 | -0.8674242644 | -0.0118900930 |
| C | -1.2730317593 | -1.6730310378 | -1.7503878513 |
| C | -1.7243213980 | -2.1872344105 | 1.2914983577  |
| C | -2.3973193667 | -2.6660555257 | -2.0361970107 |
| H | -2.2884774179 | -3.0531264707 | -3.0632772391 |
| H | -2.3845369616 | -3.5307396320 | -1.3616051638 |
| H | -3.3873390980 | -2.1952019608 | -1.9656530281 |
| C | -1.2868111719 | -0.5946478372 | -2.8400492100 |
| H | -0.4849688742 | 0.1438061172  | -2.6940830001 |
| H | -1.1116367702 | -1.0858788671 | -3.8112326591 |
| H | -2.2444825206 | -0.0654746322 | -2.9131732101 |
| C | 0.0995523918  | -2.3575158558 | -1.8748806662 |
| H | 0.2235428533  | -2.7507272401 | -2.8977120015 |
| H | 0.9293232054  | -1.6290092500 | -1.7371447379 |
| H | 0.2545292135  | -3.1849559523 | -1.1761783947 |
| C | -1.2537701393 | -1.6712037010 | 2.6610981132  |
| H | -1.7976118517 | -0.7871627849 | 3.0077929149  |
| H | -1.4064382687 | -2.4688545473 | 3.4066769141  |
| H | -0.1829894286 | -1.4216593377 | 2.6349156057  |
| C | -3.2069359495 | -2.5578155398 | 1.3524560804  |
| H | -3.8370281076 | -1.7135957378 | 1.6622536804  |
| H | -3.5887874150 | -2.9322979463 | 0.3935585247  |
| H | -3.3477059603 | -3.3571420092 | 2.0989222197  |
| C | -0.8957770516 | -3.4502704509 | 1.0305383524  |
| H | -1.1893921664 | -3.9866074716 | 0.1199286359  |
| H | 0.1781467205  | -3.2162878158 | 0.9779920304  |
| H | -1.0427887793 | -4.1417758341 | 1.8758376099  |
| C | -2.5229703007 | 0.5559594154  | 0.0401168274  |
| C | -2.7621928370 | 0.9777475523  | 1.5044128234  |
| C | -3.8876078102 | 0.2601609436  | -0.6075740808 |
| C | -1.8762888800 | 1.7717121357  | -0.6649742592 |
| H | -3.2390777483 | 0.1638209250  | 2.0669705739  |
| H | -1.7954929711 | 1.1915829929  | 1.9888809144  |
| C | -3.6730030309 | 2.2075413006  | 1.5833964872  |
| H | -4.3782588429 | -0.5873946198 | -0.1062303937 |
| H | -3.7619687611 | -0.0246037195 | -1.6619854311 |
| C | -4.7920906608 | 1.4973227473  | -0.5293154379 |
| H | -0.9060546854 | 1.9868737921  | -0.1898989069 |
| H | -1.6611459651 | 1.5480841214  | -1.7153918777 |
| C | -2.7941900310 | 2.9955772345  | -0.5997798790 |
| H | -3.8239582604 | 2.4593153549  | 2.6461344596  |
| C | -5.0190215579 | 1.8780970585  | 0.9346545759  |
| C | -3.0252130216 | 3.3852177349  | 0.8583309969  |
| H | -5.7576828239 | 1.2566590915  | -1.0043319363 |
| C | -4.1322965100 | 2.6652487215  | -1.2653721735 |
| H | -2.3064120359 | 3.8259980648  | -1.1360952376 |

|    |               |               |               |
|----|---------------|---------------|---------------|
| H  | -5.6968041368 | 2.7456058898  | 1.0017613394  |
| H  | -5.5080796666 | 1.0472636427  | 1.4716532627  |
| H  | -2.0668195959 | 3.6461419479  | 1.3371342294  |
| H  | -3.6718920981 | 4.2765600739  | 0.9236704265  |
| H  | -3.9748162060 | 2.4052502655  | -2.3261992802 |
| H  | -4.7955010438 | 3.5464872278  | -1.2480478747 |
| Pt | 0.9671831585  | -0.2361770791 | 0.1578271139  |
| C  | 2.9423802211  | 0.2052436082  | 0.1330333728  |
| C  | 3.8849758025  | -0.5588676761 | 0.8488156996  |
| C  | 3.4554880827  | 1.2262101879  | -0.6913735439 |
| C  | 5.2578634729  | -0.3442906574 | 0.7335934539  |
| C  | 4.8237110360  | 1.4597012569  | -0.8223915889 |
| H  | 2.7672102881  | 1.8635984707  | -1.2540486166 |
| C  | 5.7161883680  | 0.6664606965  | -0.1067722371 |
| H  | 5.2009212786  | 2.2530083249  | -1.4707645836 |
| H  | 0.8616280368  | 0.7563098660  | 1.3075167276  |
| H  | 3.5418087389  | -1.3508770627 | 1.5206899899  |
| Cl | 7.4311430021  | 0.9485886307  | -0.2587484473 |
| H  | 5.9722583947  | -0.9514789101 | 1.2930470944  |

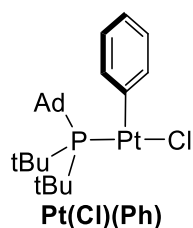

65

**Pt(Cl)(Ph)**

|   |               |               |               |
|---|---------------|---------------|---------------|
| P | -0.1774444224 | 1.1496359440  | -0.1650906253 |
| C | 0.0526627371  | 2.5613469682  | 1.1135573835  |
| C | -0.1294100425 | 1.9137860666  | -1.9213666992 |
| C | -0.7099254263 | 3.8536507742  | 0.8262186453  |
| H | -0.5163161212 | 4.5696744427  | 1.6420225465  |
| H | -0.3987203840 | 4.3375794024  | -0.1074238026 |
| H | -1.7949819511 | 3.6914206082  | 0.7824970945  |
| C | -0.3290370650 | 2.0670930152  | 2.5131287767  |
| H | 0.1880502844  | 1.1299506764  | 2.7653740654  |
| H | -0.0139317871 | 2.8295697296  | 3.2438061524  |
| H | -1.4091977526 | 1.9239540237  | 2.6378122829  |
| C | 1.5666130249  | 2.8338017770  | 1.1686851562  |
| H | 1.7740936967  | 3.5641225490  | 1.9684231131  |
| H | 2.1391299783  | 1.9256024316  | 1.4629538164  |
| H | 1.9883291776  | 3.2287899807  | 0.2407366102  |
| C | 0.2000538611  | 0.8006404107  | -2.9236490831 |
| H | -0.5176140793 | -0.0256521058 | -2.9268384391 |
| H | 0.2175166487  | 1.2368989216  | -3.9357319843 |
| H | 1.1967621744  | 0.3901604909  | -2.7137170724 |
| C | -1.4169238130 | 2.6268735582  | -2.3387527995 |
| H | -2.2624891572 | 1.9366192676  | -2.4493151504 |
| H | -1.7112216818 | 3.4183666623  | -1.6380033382 |
| H | -1.2550489762 | 3.0993352212  | -3.3214392055 |

|    |               |               |               |
|----|---------------|---------------|---------------|
| C  | 1.0418478414  | 2.8980487176  | -2.0247705485 |
| H  | 0.8951664378  | 3.8167568338  | -1.4452971254 |
| H  | 1.9885390037  | 2.4276088806  | -1.7207239616 |
| H  | 1.1461330760  | 3.1937204220  | -3.0809224206 |
| C  | -1.8453554180 | 0.2835827917  | 0.1129135383  |
| C  | -2.1595867823 | -0.6152366475 | -1.1024727017 |
| C  | -3.0310764712 | 1.2403178139  | 0.3402413915  |
| C  | -1.7217909880 | -0.6452876083 | 1.3409484591  |
| H  | -2.2839329538 | -0.0073110839 | -2.0085896198 |
| H  | -1.3247295696 | -1.3104522031 | -1.2793116608 |
| C  | -3.4525058779 | -1.4049960619 | -0.8779041752 |
| H  | -3.1596693436 | 1.9176235868  | -0.5153671905 |
| H  | -2.8498749720 | 1.8699267675  | 1.2233586352  |
| C  | -4.3241406318 | 0.4406177342  | 0.5573193945  |
| H  | -0.8921516726 | -1.3446213792 | 1.1858662203  |
| H  | -1.4931833690 | -0.0728863214 | 2.2458780401  |
| C  | -3.0182943929 | -1.4292610404 | 1.5647614302  |
| H  | -3.6396366377 | -2.0198814316 | -1.7735041614 |
| C  | -4.6096704215 | -0.4271488386 | -0.6698926841 |
| C  | -3.3003878001 | -2.3058317440 | 0.3460078614  |
| H  | -5.1516973804 | 1.1530166566  | 0.7110008337  |
| C  | -4.1752412559 | -0.4548655535 | 1.7885639296  |
| H  | -2.8861504561 | -2.0631216314 | 2.4569627143  |
| H  | -5.5556739693 | -0.9771616988 | -0.5320890818 |
| H  | -4.7367589263 | 0.2077355590  | -1.5637852130 |
| H  | -2.4720625116 | -3.0171100134 | 0.1915766161  |
| H  | -4.2179084665 | -2.8983252871 | 0.5013037091  |
| H  | -3.9860350534 | 0.1600942505  | 2.6851550178  |
| H  | -5.1127112323 | -1.0067012422 | 1.9710744291  |
| Pt | 1.7369538495  | 0.0158676164  | 0.2706359524  |
| Cl | 3.8655474210  | -0.6377099622 | 0.8871652976  |
| C  | 1.1891219289  | -1.8071491236 | -0.2231134091 |
| C  | 0.9568832073  | -2.7160275964 | 0.8194886416  |
| C  | 1.0913488267  | -2.2554349614 | -1.5433275769 |
| C  | 0.5625062957  | -4.0242109819 | 0.5402336472  |
| H  | 1.0869083965  | -2.4019267467 | 1.8566729082  |
| C  | 0.6993406305  | -3.5681701755 | -1.8149167012 |
| H  | 1.3215564306  | -1.5886926188 | -2.3722729370 |
| C  | 0.4166287055  | -4.4542155208 | -0.7781463390 |
| H  | 0.3777954077  | -4.7147659518 | 1.3673282678  |
| H  | 0.6217947321  | -3.8971966925 | -2.8546433314 |
| H  | 0.1069724641  | -5.4791044443 | -0.9949278604 |
